# Supplementary material for: On-Demand Isolation and Manipulation of C. elegans by In Vitro Maskless Photopatterning
Source: PLoS One. 2016 Jan 5;11(1):e0145935. doi: 10.1371/journal.pone.0145935 (PMC4701667; doi:10.1371/journal.pone.0145935)
Supplement: S1 Data — The raw data collected in the experiments shown is provided in tabular form. (XLSX) [file pone.0145935.s001.xlsx]

## Sheet: Fig. 2b and 2c
		Objective Magnification
Trial	Height	5		20		50
		Exposure time (s)	Resolution (um)	Exposure time (ms)	Resolution (um)	Exposure time (ms)	Resolution (um)
1	1000	0.35	100	0.35	11	NA	NA
2	1000	3	34	0.3	9.2	NA	NA
3	1000	0.37	26	0.25	7.8	NA	NA
4	1000	0.4	34.2	0.2	7.4	NA	NA
1	100	0.5	74.5	0.35	5.5	0.5	3.6
2	100	1	53.9	0.3	3.6	1	2.8
3	100	2	26.1	0.25	3.3	1.5	3.1
4	100	3	54.6	0.2	5.8	2	3.8
1	10	1	47.1	0.35	7.8	0.5	2.8
2	10	3	26.1	0.3	3.4	1	2.8
3	10	6	33	0.25	3.6	1.5	2.88
4	10	9	20.46	0.2	3.9	2	3.4
1	1	1	NA	0.9	5.5	0.5	7
2	1	3	107.9	0.35	5.5	1	4.8
3	1	6	67.1	0.3	4.1	2	2.3
4	1	9	46.5	0.25	4.6	2.5	1.5
NA	Data not available because exposure time exceeded 5 minutes or resolution was unmeasurable.

## Sheet: Fig. 3c-No Pillars
Worm centroid
X (pixel)	Y (pixel)
823.127	268.56
821.811	286.626
803.876	299.986
799.295	294.622
800.825	312.07
780.398	328.952
740.804	326.923
728.737	320.15
732.739	332.296
725.747	353.792
755.152	393.944
708.379	333.58
727.1	366.797
717.099	378.736
697.351	361.8
705.344	380.495
691.344	366.679
707.873	382.112
692.143	390.937
679.956	385.6
692.111	392.745
727.155	400.848
726.531	402.002
735.737	405.176
734.66	399.792
757.052	394.364
875.753	376.665
895.341	371.396
950.208	350.035
1003.28	369.831
999.407	371.732
1004.71	380.336
991.301	372.347
1001.7	381.713
998.081	382.608
1007.15	386.529
1007.5	386.79
1006.87	389.649
1005.39	383.049
1000.52	391.429
1004.16	411.169
996.747	402.592
991.424	415.213
958.098	419.088
955.471	415.506
1005.13	427.077
988.359	448.726
984.229	422.562
975.073	420.39
984.678	420.358
975.429	420.898
984.468	423.028
994.824	420.663
1001.6	412.096
1006.66	405.223
1018.34	403.908
1059.08	401.713
1052.28	395.418
1012.9	401.881
1018.75	411.815
1023.78	414.155
1038.83	420.058
1013.66	413.858
1025.64	420.445
1039.43	429.251
1032.64	426.143
997.84	419.434
1028.16	429.828
1019.68	432.726
1014.74	436.688
1028.24	432.621
1028.27	435.369
1019.76	439.05
1022.36	437.318
1027.14	435.991
1048.28	435.281
1052.17	432.644
1049.53	432.685
1060.71	427.953
1059.59	422.876
1054.15	422.74
1054.8	418.179
1054.57	423.753
1065.47	436.174
1039.83	425.489
1067.77	439.997
1072.24	440.546
1067.11	441.039
1075.14	442.908
1078.98	445.97
1077.06	443.942
1045.99	444.096
1045.76	445.744
1073.5	444.536
1072.53	446.894
1068.72	454.511
1103.13	448.598
1080.67	445.909
1066.74	454.972
1083.84	444.135
1086.44	443.607
1084	445.052
1076.85	447.402
1095.4	446.269
1101.33	444.447
1099.41	442.259
1064.81	439.383
1100.44	431.114
1096.41	432.311
1101.14	438.993
1106.08	443.291
1099.82	444.012
1102.17	446.374
1128.48	454.563
1120.01	452.342
1122.8	454.403
1124.38	457.074
1115.27	460.562
1112.9	464.077
1122.91	456.219
1124.08	456.877
1121.52	460.371
1117.41	463.074
1144.74	454.358
1155.5	463.382
1052.13	503.218
1026.58	529.476
924.189	532.245
861.177	547.736
858.491	546.993
862.039	552.87
865.288	554.581
871.51	559.228
868.888	561.271
894.038	566.21
889.646	567.995
889.097	570.014
885.537	573.888
882.467	575.79
921.109	570.375
917.729	570.107
892.652	573.282
879.275	579.084
888.13	576.307
907.588	571.361
905.541	569.621
910.752	566.615
911.318	560.073
908.797	555.639
904.835	553.774
922.808	574.683
954.523	557.816
947.505	505.145
951.338	494.066
954.964	483.074
961.092	487.184
956.991	498.218
965.844	485.08
972.395	466.207
1002.2	433.62
1018.42	420.043
978.816	426.015
974.065	428.082
976.06	428.331
971.989	425.954
1001.02	421.784
1006.84	417.171
999.67	412.896
996.975	408.931
995.086	411.555
1004.06	419.67
1008.19	423.474
993.219	421.246
998.084	424.175
989.654	423.684
984.178	426.476
978.204	428.671
971.327	430.032
1010.77	439.994
1015.07	431.588
1013.15	436.286
1006.83	439.456
1009.83	436.899
1010.14	437.683
1005.71	435.135
1032.83	427.171
1029.73	423.732
1028.31	418.571
1026.24	415.442
1026.18	420.436
1029.25	424.426
1033.12	425.932
1036.94	429.853
1028.02	428.299
1024.73	429.893
1052.51	437.004
1046.68	437.84
1043.5	440.082
1040.16	444.17
1013.04	446.401
1045.76	446.483
1002.98	443.79
845.889	232.438
1069.91	455.055
1037.37	448.566
1075.88	441.79
995.462	449.013
1009.37	459.169
1065.26	439.111
796.192	236.691
1077.29	435.058
1078.9	433.66
1113.66	411.285
1036.65	459.224
1064.78	445.713
1063.1	447.993
1071.87	440.691
1102.83	417.063
1166.11	707.23
989.487	449.39
1115.29	403.099
1104.87	412.627
1062.9	450.991
1102.13	414.063
1088.31	430.132
1047.46	462.357
1062.39	451.041
1077.88	436.577
1076.35	438.203
1074.53	440.661
998.282	446.738
1074.99	444.381
1048.7	467.799
1068.27	447.56
1003.8	453.372
994.607	439.452
1077.39	445.08
1081.12	441.524
1047.49	446.347
1013.51	449.856
1017.41	448.605
1060.04	451.493
1050.29	444.993
1064.36	451.72
1063.34	450.584
1016.58	444.461
1038.51	446.495
1035.9	446.464
1035.1	445.535
1031.51	443.747
1063.39	444.815
1031.89	443.339
1059.76	439.505
1054.45	436.335
1060.62	440.32
1064.88	441.614
1066.09	441.874
992.142	449.063
994.338	440.674
999.87	437.983
1051.7	441.392
1036.21	434.532
1042.91	432.323
1045.59	437.05
1040.59	439.386
1011.67	455.212
1006.01	462.768
1034.32	446.893
1004.61	469.828
1003.92	469.587
1031.5	449.469
1055.1	439.503
1025.51	452.276
1052.65	448.318
1018.54	470.179
1053.84	446.208
992.538	461.902
1023.14	455.058
997.538	459.51
1000.34	458.131
1006.32	461.45
1054.09	453.042
1002.95	456.249
1006.71	457.317
1005.72	455.341
1050.34	447.138
1012.99	462.171
1010.05	456.396
1011.27	457.488
1011.22	455.999
1048.69	442.179
1047.21	443.057
1030.21	448.379
1044.4	441.019
1022.08	470.821
1022.64	470.228
1027.22	457.488
1030.71	458.308
1031.57	456.42
1033.46	458.29
1034.76	457.371
1036.02	457.437
1037.91	459.053
1037.91	458.892
1039.29	460.272
1035.92	461.06
1035.92	462.563
1032.38	464.963
1035.58	464.256
1060.39	472.919
1059.71	471.635
1057.14	471.389
1046.4	461.462
1045.9	461.106
1040.64	458.325
1040.59	457.615
1038.14	456.877
1035.05	456.46
1025.08	450.247
1030.72	454.581
1031.74	456.296
1032.52	456.19
1030.38	456.726
1016.41	444.695
1017.42	447.797
1045.5	460.496
1008.71	446.476
1019.23	450.29
1019.78	449.018
1022.93	450.574
1013.36	445.004
1003.89	431.007
1011.18	435.408
1008.4	433.667
1027	449.177
1024.87	439.807
1006.69	427.581
1046.41	459.089
1049.51	466.94
1033.41	452.306
1054.45	473.893
1057.67	484.144
1024.99	449.034
1003.1	424.225
1039.77	455.875
1038.9	454.61
1035.97	452.988
1023.27	438.989
1031.53	452.03
1007.74	430.9
996.418	430.34
1001.87	436.833
977.639	438.959
1011.25	445.722
1013.46	443.551
1008.54	431.305
1007.68	428.374
1024.69	447.699
991.005	410.086
1006.68	426.598
1007.89	425.272
1003.19	420.682
1003.66	421.752
1020.29	434.388
1007.13	428.701
1005.61	423.986
1007.38	423.682
1019.74	435.075
1006.33	422.649
989.998	410.791
996.542	416.654
998.129	418.721
999.891	420.238
994.634	426.475
989.113	430.378
976.876	400.791
994.533	417.154
996.44	417.246
992.217	410.485
998.55	421.788
984.526	395.218
1006.68	417.753
979.513	389.992
973.194	369.7
985.016	376.633
988.999	402.536
987.939	402.212
997.186	406.767
998.061	412.607
978.563	397.1
983.869	410.116
972.381	396.984
968.166	394.93
963.028	395.872
966.209	406.722
968.293	398.738
974.009	400.417
971.472	397.771
971.144	393.187
974.34	395.329
964.906	377.124
966.712	374.977
965.945	375.668
986.321	399.26
989.373	406.597
977.335	380.512
971.691	375.984
989.944	392.552
986.94	381.866
975.304	377.94
965.475	368.145
958.414	362.642
951.359	358.28
951.985	361.194
946.125	363.059
924.421	349.196
948.046	371.522
951.623	364.352
950.5	357.839
954.567	362.512
956.638	363.503
956.045	352.355
947.873	340.146
949.382	341.344
953.851	345.107
960.757	347.74
964.488	350.479
956.925	346.12
972.542	357.064
964.634	350.014
959.687	347.158
948.264	337.336
938.834	332.732
928.699	327.222
935.853	335.437
905.657	313.194
932.13	345.13
937.303	349.372
942.471	340.402
940.496	333.392
945.354	347.892
936.694	314.957
946.989	337.663
938.363	318.726
955.611	351.031
959.206	359.038
961.787	360.492
952.476	338.162
934.361	299.453
950.222	326.79
959.181	336.767
956.91	335.113
947.853	328.956
948.578	332.97
925.51	304.814
928.633	313.119
929.229	322.874
911.637	314.231
939.571	350.345
945.488	343.375
947.748	344.972
937.345	320.75
943.182	332.032
937.321	315.771
938.177	316.593
941.097	321.122
964.22	358.921
955.904	334.87
959.753	335.263
947.955	325.909
966.533	334.973
958.113	329.894
953.914	328.647
936.137	312.533
930.677	311.651
922.753	306.757
921.562	309.244
926.828	317.591
927.776	326.252
935.162	344.099
923.694	333.809
939.066	338.139
943.155	359.306
942.1	342.219
938.679	326.324
940.287	321.691
940.22	319.339
942.919	323.486
961.133	363.874
962.052	371.931
934.193	295.905
957.654	332.757
954.634	329.727
954.923	331.282
927.762	303.699
950.658	333.515
929.19	312.131
924.295	311.938
924.141	315.342
905.352	289.757
911.319	311.258
933.789	352.718
939.528	348.093
939.387	336.512
935.396	315.888
935.803	315.687
936.933	319.273
937.035	312.975
953.459	354.784
956.448	360.161
949.609	327.57
944.099	323.905
939.565	306.895
952.541	330.379
949.097	328.66
945.888	331.292
942.649	336.194
928.507	321.911
924.79	325.898
896.844	300.911
924.475	333.711
927.952	340.51
933.129	344.996
935.468	348.396
926.73	327.219
934.523	338.539
930.54	322.958
933.787	322.442
938.31	328.471
959.772	363.469
947.619	334.472
933.077	321.017
935.939	321.134
946.221	330.815
941.284	327.976
924.243	311.77
918.643	309.043
935.637	339.735
916.627	322.711
918.214	331.347
921.604	336.325
926.105	348.782
925.691	338.512
927.709	341.532
916.284	309.162
923.37	321.037
921.063	313.131
940.68	343.126
923.875	309.509
932.835	320.713
938.644	325.109
942.058	327.065
929.425	317.769
941.827	324.942
935.396	319.859
935.476	322.447
926.22	319.008
912.822	311.997
909.626	314.211
912.414	323.733
883.082	302.891
914.633	328.255
924.44	343.145
921.757	335.929
923.915	336.882
918.026	326.254
923.812	329.445
918.71	312.757
915.21	304.098
922.582	310.159
952.333	344.855
933.894	317.505
920.195	311.692
923.497	312.496
934.315	318.892
928.345	316.059
911.442	304.583
922.178	318.308
913.592	309.989
931.046	329.981
900.49	319.903
875.971	310.52
910.961	339.362
913.482	339.734
920.432	348.761
918.381	338.87
907.869	320.442
920.224	332.831
909.726	308.958
913.913	311.016
918.419	310.494
946.683	345.036
917.714	314.265
918.816	310.362
931.11	317.528
925.061	313.409
908.626	303.961
906.578	306.068
918.609	321.516
897.293	314.569
929.611	338.508
898.255	327.039
903.998	333.282
901.434	324.393
910.75	334.316
910.471	330.122
902.318	318.773
891.332	306.284
890.137	301.71
891.932	300.519
926.046	323.888
880.652	274.066
885.978	278.363
895.078	300.906
895.514	300.876
906.962	304.534
900.823	303.419
879.625	295.356
897.672	312.484
900.842	320.352
880.098	314.656
882.467	322.869
887.146	328.959
882.874	316.317
894.016	330.302
884.058	317.296
875.7	308.12
886.604	313.067
873.809	296.496
872.743	294.042
881.316	297.272
917.922	321.84
855.694	280.978
881.508	296.507
878.721	295.551
891.206	299.541
882.409	297.611
866.696	293.715
882.852	306.416
862.819	303.548
824.35	297.069
860.832	310.727
865.161	312.13
865.131	310.471
876.065	318.429
866.632	309.128
861.444	304.644
852.57	296.701
854.43	293.153
853.653	288.858
891.403	304.875
866.362	288.522
859.564	288.521
850.48	286.346
867.457	288.43
861.69	288.425
858.383	289.886
853.026	293.503
857.218	300.653
871.908	306.706
842.878	308.386
847.791	313.467
851.462	313.206
851.281	310.152
858.473	311.853
842.176	300.338
835.168	294.106
831.203	292.516
831.357	288.717
861.384	294.534
871.785	298.902
810.505	263.337
836.817	284.41
852.389	282.208
843.581	283.997
836.666	285.044
830.1	287.623
807.049	286.196
828.856	298.878
840.079	306.297
774.825	305.77
812.424	305.771
800.113	304.854
819.734	313.826
807.75	299.576
812.731	296.175
799.502	288.033
793.546	286.352
784.683	283.09
786.536	291.471
776.775	300.82
798.856	299.605
778.552	311.181
818.927	294.647

## Sheet: Fig. 3c-Pillars
Worm centroid
X (pixel)	Y (pixel)
721.178	355.399
717.032	369.346
715.864	358.496
709.074	362.796
704.575	358.831
703.419	349.268
697.928	351.358
710.075	333.931
725.198	318.237
706.178	340.352
706.943	337.367
708.241	334.486
704.486	336.325
707.524	337.96
700.43	339.96
701.475	336.968
702.921	334.624
675.528	334.791
673.989	337.366
663.06	351.51
693.632	340.31
693.404	338.829
696.187	332.933
688.604	336.242
690.151	335.171
688.108	332.501
690.547	339.469
692.874	366.892
696.998	350.942
707.139	339.133
707.165	344.438
704.99	345.774
712.544	356.052
712.664	355.12
712.767	347.069
714.189	353.492
717.451	352.351
719.071	355.423
717.964	362.863
716.787	398.506
720.521	377.369
718.809	365.839
704.593	365.91
679.261	365.122
661.551	359.153
688.344	350.923
676.724	352.712
678.279	341.593
679.67	335.064
674.959	327.911
678.198	328.16
672.057	332.153
667.389	336.285
631.999	351.027
635.115	358.776
640.954	352.352
642.392	350.917
649.05	355.39
678.351	336.898
672.106	339.576
669.345	339.569
672.326	336.424
669.185	336.162
665.14	334.991
627.306	328.986
653.766	339.974
677.66	333.597
699.198	337.064
659.916	332.834
664.916	330.461
690.443	337.91
688.277	336.448
677.371	345.745
599.859	294.107
657.715	348.606
598.058	289.934
612.112	309.074
604.437	299.313
605.754	292.311
615.826	296.107
584.429	257.972
600.913	280.295
598.068	292.341
619.709	302.864
617.236	299.066
614.362	296.688
611.121	292.801
605.801	291.405
615.729	297.762
602.119	289.635
594.916	286.085
593.622	284.057
573.549	276.058
580.786	266.498
562.054	258.761
560.573	259.238
601.091	247.767
594.502	251.878
505.844	264.35
579.037	256.236
502.585	268.154
538.791	260.943
497.05	263.893
595.502	259.96
529.981	277.553
558.921	265.857
555.095	263.423
581.013	266.072
578.166	283.35
534.098	261.491
553.031	281.584
557.052	278.414
575.085	277.581
554.897	259.324
502.641	260.307
512.145	257.276
549.435	255.696
553.329	259.51
549.063	259.365
586.306	257.736
594.325	256.004
591.035	258.655
604.157	253.894
583.773	260.764
495.89	262.595
493.596	264.125
538.147	268.087
522.391	274.462
583.142	277.944
507.399	276.284
553.417	282.811
539.405	271.069
551.128	278.764
556.232	279.923
553.334	274.045
586.844	266.626
545.666	251.631
519.743	255.427
536.485	253.594
542.77	260.179
584.917	256.93
590.236	256.457
590.708	257.356
580.872	260.524
579.893	262.391
490.277	259.828
523.027	264.549
522.205	270.35
527.713	277.033
522.968	280.539
551.292	281.065
550.584	281.577
543.62	271.52
555.812	280.359
556.209	280.119
561.942	276.676
488.851	266.733
520.617	261.644
517.137	258.007
526.109	256.375
559.098	260.566
581.228	257.456
571.727	263.66
584.834	258.443
496.63	262.258
582.377	260.391
489.817	263.776
584.357	268.523
523.611	273.706
494.434	274.339
522.211	284.351
549.247	282.293
549.089	281.275
540.408	271.786
556.018	281.368
556.825	278.075
554.53	264.171
550.696	257.736
542.254	254.876
522.75	253.007
555.674	259.826
565.413	261.041
575.814	261.95
586.398	259.213
588.506	259.265
495.188	259.269
580.468	259.879
491.349	261.551
485.879	263.331
519.274	271.102
485.804	274.726
519.412	281.609
518.307	285.36
544.923	278.149
546.214	278.621
545.226	271.446
552.114	278.228
552.325	276.056
571.861	266.457
553.911	256.217
544.235	253.04
555.521	253.948
516.995	254.433
525.863	260.408
551.414	269.119
587.442	255.992
582.385	259.479
585.44	257.489
574.577	262.444
465.971	238.328
462.733	245.91
485.462	264.528
453.002	266.033
550.549	281.163
509.569	287.169
512.988	278.6
550.946	279.087
541.79	271.379
553.524	277.148
552.829	277.155
516.437	274.035
546.471	256.341
549.058	253.338
555.442	253.001
553.469	257.888
555.204	261.168
556.366	266.377
584.739	258.149
582.576	258.452
580.859	260.762
475.49	238.01
546.675	269.234
549.65	269.269
515.557	266.913
455.433	274.277
553.404	281.017
547.906	279.508
547.289	278.69
538.725	272.015
547.007	272.063
553.98	277.675
547.364	273.497
568.425	262.877
461.015	275.261
546.119	254.905
462.165	252.186
551.207	258.012
525.298	257.808
551.984	267.835
474.432	241.128
571.118	265.208
471.703	227.969
545.676	269.571
483.62	259.163
548.153	272.65
458.79	266.394
489.13	274.958
546.749	279.99
547.982	280.479
543.077	276.555
546.609	277.578
553.227	277.965
553.855	275.719
565.605	268.912
481.064	272.07
539.654	254.521
459.158	253.51
552.912	256.544
557.656	260.172
546.81	270.336
587.862	257.274
588.523	256.296
473.579	239.398
545.655	269.842
130.291	682.182
551.477	269.055
116.67	662.264
487.134	276.111
550.053	280.386
549.494	280.78
538.386	273.445
548.464	278.369
547.138	273.177
553.546	276.668
549.818	268.58
511.222	266.445
550.243	253.478
460.008	249.521
556.787	255.465
524.599	258.116
544.311	268.264
564.878	266.629
566.455	266.378
469.125	239.54
460.01	242.026
548.911	269.846
512.058	267.669
514.383	271.413
453.827	277.459
512.191	282.341
548.658	279.668
518.112	280.802
542.004	272.748
542.641	270.95
547.482	271.488
551.798	275.151
559.209	265.037
521.174	258.972
495.539	263.92
463.781	255.774
554.859	256.465
523.355	258.289
554.243	264.214
581.288	258.416
579.687	259.58
575.429	261.562
464.98	241.516
547.501	270.153
546.974	271.225
479.071	266.938
485.33	271.916
507.293	280.872
528.182	273.675
532.555	272.76
537.487	273.422
544.663	273.706
545.113	272.271
552.818	277.592
547.918	272.799
548.524	264.359
526.807	257.126
553.793	251.97
549.338	256.898
549.744	261.335
542.847	267.4
474.204	219.205
560.816	268.189
461.84	234.93
548.052	270.48
550.051	270.229
544.096	273.034
547.926	275.789
552.124	279.944
491.191	280.297
547.618	280.328
544.645	277.798
550.56	280.316
543.984	272.193
548.435	273.682
551.422	277.016
554.91	270.398
564.083	262.277
526.159	257.645
546.3	253.363
559.346	252.287
550.534	259.18
554.011	260.025
537.491	259.093
472.59	229.215
471.626	239.037
460.907	238.011
457.486	245.674
575.739	263.27
547.88	272.17
578.389	273.199
514.405	276.955
485.811	280.21
515.88	284.779
549.751	280.51
547.091	278.337
544.467	272.271
549.848	277.545
548.881	276.214
548.459	267.56
456.337	286.352
457.69	280.576
549.85	253.035
551.306	255.029
555.756	255.835
522.701	259.123
559.37	261.515
580.21	257.095
576.868	260.252
576.637	261.004
568.154	263.656
546.759	269.63
452.563	242.319
506.611	264.514
514.131	269.795
482.214	273.362
522.144	273.976
546.45	279.984
540.357	276.542
538.963	273.964
550.463	277.908
549.088	274.906
554.026	279.798
556.183	272.085
563.934	263.235
542.377	255.92
544.825	254.448
460.699	250.484
553.77	258.383
552.277	261.823
564.83	259.942
577.239	257.833
470.092	243.129
454.992	234.305
541.642	271.24
475.369	261.568
574.587	264.016
509.313	269.24
550.942	275.115
485.201	277.703
554.953	281.018
516.412	282.008
541.824	275.744
538.946	274.313
546.789	274.959
553.104	278.98
554.468	277.988
555.676	270.189
562.459	262.016
532.65	256.292
547.286	254.332
553.27	255.321
551.175	260.849
558.792	261.424
579.264	259.053
474.641	237.58
473.22	239.278
465.453	236.375
457.742	236.559
451.724	248.308
546.349	269.695
508.654	268.127
455.266	268.177
482.389	278.577
454.47	288.85
497.519	279.555
459.176	301.725
553.429	282.116
452.604	308.525
545.173	273.987
556.656	281.515
558.848	275.447
563.794	265.813
546.368	260.753
544.451	255.919
536.448	258.836
553.435	255.766
552.893	259.278
551.223	262.68
550.398	264.268
569.374	258.557
467.954	238.527
461.018	239.004
571.384	258.55
571.036	260.731
542.987	271.051
451.977	262.924
546.447	270.95
556.419	273.723
457.434	285.681
582.703	280.637
459.508	298.335
554.45	280.135
533.576	272.827
558.217	280.917
544.455	273.955
558.507	280.631
549.891	276.992
558.06	269.232
560.395	262.51
455.475	278.832
526.411	258.824
553.76	252.519
507.143	254.91
552.435	257.624
559.897	257.788
560.394	259.097
561.596	260.246
555.044	266.349
568.18	263.242
454.666	250.812
449.72	260.053
550.389	272.47
484.659	274.707
554.656	278.713
517.971	284.69
550.963	280.8
547.101	280.105
545.996	274.348
540.677	273.766
555.965	280.417
551.889	274.646
559.087	263.628
452.516	277.56
552.547	253.635
549.34	254.194
551.728	258.318
555.742	259.637
559.488	260.664
564.127	262.174
594.666	251.986
474.991	242.226
569.032	264.283
548.557	269.188
510.593	260.973
548.305	270.808
548.125	272.486
482.189	273.133
451.555	283.563
552.293	281.049
551.956	280.697
540.152	278.496
540.717	273.349
544.004	273.465
552.373	280.507
549.009	275.795
559.391	267.054
547.71	260.866
542.774	256.723
548.728	253.982
514.832	258.595
552.681	260.88
558.94	261.233
550.688	266.166
472.847	236.964
468.949	236.798
467.104	243.786
462.551	249.564
447.785	254.614
575.612	263.804
554.322	273.89
483.429	275.615
552.534	279.554
548.889	279.362
553.729	280.195
536.707	274.211
538.926	273.791
542.436	272.169
552.551	278.423
554.722	278.979
554.666	271.253
567.068	262.518
456.795	279.783
541.821	256.853
553.209	252.701
553.654	256.141
551.771	260.638
527.562	261.521
542.11	269.142
473.855	241.706
470.401	242.942
541.819	272.16
456.038	249.496
548.562	269.648
542.492	271.903
512.539	272.829
523.585	276.337
455.728	289.078
459.463	295.946
553.896	281.022
534.446	272.636
536.76	273.284
542.812	274.34
559.551	283.277
555.381	279.093
559.838	271.203
567.417	260.463
532.442	257.038
549.161	255.435
550.867	257.08
550.655	260.12
524.86	262.003
561.245	261.771
463.784	241.892
549.148	268.42
520.656	265.837
550.349	269.671
547.646	272.316
455.476	277.002
550.514	277.217
586.213	284.937
531.608	274.408
584.399	289.155
452.278	308.43
454.549	305.755
584.845	293.344
455.561	300.997
562.515	282.291
557.538	281.225
563.561	279.611
557.368	276.454
555.716	273.916
561.765	268.099
455.704	272.818
457.918	267.636
552.398	254.536
516.701	259.342
553.746	259.151
558.026	259.516
557.479	260.695
536.063	263.338
553.795	265.406
475.461	247.887
466.299	243.04
461.925	248.18
575.157	258.668
550.263	268.405
542.588	271.129
482.254	273.037
485.51	275.739
454.738	286.925
559.729	279.636
582.446	284.891
530.518	274.382
557.832	281.589
562.488	284.459
571.325	286.356
549.515	279.175
552.157	272.086
558.491	262.885
453.81	279.62
551.186	254.004
545.098	257.065
516.551	260.316
554.683	258.107
558.949	259.583
521.032	265.643
571.91	259.737
469.986	240.593
466.197	245.425
488.268	264.593
579.104	259.574
553.854	267.866
449.528	267.228
484.463	275.485
553.564	274.56
457.518	293.113
490.314	284.209
556.405	280.051
536.529	273.896
534.005	272.31
543.571	274.016
457.016	313.024
455.78	307.165
552.745	279.656
559.365	275.436
556.952	268.017
561.693	262.385
456.542	278.558
552.883	253.752
545.127	256.878
553.005	255.984
554.612	257.626
549.319	261.294
559.606	260.02
560.8	259.63
552.764	262.955
556.631	263.316
570.109	261.602
516.676	268.383
452.899	266.706
551.212	273.96
455.531	284.724
520.382	274.571
554.396	279.793
558.521	280.782
580.571	289.245
466.605	309.619
571.694	285.384
556.323	280.726
555.457	276.41
555.557	264.841
536.879	259.227
551.485	254.088
554.682	253.269
547.055	259.133
552.816	258.625
541.899	266.911
538.991	269.926
576.221	258.582
568.112	262.601
467.83	251.219
483.927	266.008
578.122	259.991
551.291	269.772
549.934	273.264
453.974	284.656
491.501	284.293
558.212	281.973
550.637	280.881
536.419	273.347
535.361	272.478
559.416	283.523
557.63	278.616
560.767	268.303
564.791	258.646
456.797	278.536
551.427	254.504
544.666	258.04
549.656	259.657
557.542	259.24
559.793	261.469
554.113	267.23
579.818	257.221
577.593	258.491
476.86	248.389
573.966	259.593
543.799	271.744
573.044	263.916
577.474	263.784
546.687	273.043
445.423	268.65
450.946	275.778
510.614	282.179
459.007	296.26
506.933	280.881
548.227	279.669
542.895	275.665
458.638	307.787
548.934	274.013
548.645	277.046
547.573	271.948
561.839	263.62
454.92	276.117
543.1	257.277
548.637	257.105
552.782	258.498
547.866	263.182
554.496	263.141
575.626	258.766
468.385	242.67
465.022	249.74
548.521	270.091
478.116	269.806
575.67	264.998
552.265	271.641
557.805	274.31
483.455	286.627
455.28	297.371
486.457	290.334
456.739	311.215
534.254	275.188
547.991	275.895
550.995	281.26
554.868	274.741
566.044	267.015
452.264	275.176
504.335	262.128
542.106	259.832
554.09	257.442
554.622	260.635
552.825	263.474
557.782	261.718
469.426	237.91
468.755	245.644
566.363	262.513
542.967	271.519
446.61	257.9
548.894	269.737
480.553	272.609
546.848	274.019
478.593	282.048
456.696	291.526
458.058	295.989
525.93	275.937
579.807	286.648
452.514	318.235
455.324	308.35
457.748	300.822
558.545	283.464
555.246	277.639
565.576	268.255
454.266	274.145
546.529	257.625
554.664	256.561
551.722	261.915
555.908	263.723
565.837	260.395
472.031	241.061
466.3	241.793
464.073	248.215
458.368	252.977
573.685	260.647
551.898	269.624
476.203	276.196
550.69	275.684
453.737	295.316
581.438	282.841
524.115	275.644
520.023	274.682
534.673	273.696
557.867	283.834
531.655	271.25
552.969	281.87
558.017	280.119
558.664	273.609
556.068	269.211
570.584	261.333
539.285	258.791
555.986	253.337
552.023	258.053
526.249	260.852
558.037	259.426
560.822	260.206
555.151	263.293
541.751	271.222
459.396	245.812
571.824	259.916
520.146	265.973
543.12	271.631
455.971	272.513
516.676	277.898
454.046	294.834
522.248	283.949
462.326	299.016
583.128	289.922
551.509	281.82
538.511	273.697
457.618	303.382
560.798	284.399
553.275	275.585
561.737	265.601
453.468	279.583
504.866	266.091
510.722	259.743
556.142	256.707
555.249	260.174
564.987	260.511
559.025	264.113
582.656	256.911
467.969	241.455
468.098	250.79
487.644	267.365
454.661	258.781
579.312	260.767
551.599	272.544
510.985	277.389
453.144	292.061
551.488	280.153
530.778	275.185
554.461	281.797
529.171	274.469
458.18	310.217
458.098	302.983
552.343	282.463
553.686	279.123
554.467	271.663
560.336	263.808
548.761	260.251
556.426	252.632
506.01	259.799
546.531	260.848
553.822	260.694
555.964	260.886
560.303	261.655
573.937	259.009
469.026	239.577
468.535	248.982
552.568	268.632
475.227	270.184
552.254	269.503
476.708	277.366
448.715	283.086
551.08	276.64
554.443	278.231
582.103	283.136
585.899	287.524
587.224	292.134
459.144	313.058
556.806	284.007
455.183	306.433
454.269	301.68
564.712	284.498
558.547	281.547
558.845	273.706
559.073	265.611
452.405	276.366
458.801	273.169
459.171	268.636
507.503	261.25
542.864	260.041
557.228	257.173
549.277	262.8
551	262.32
523.011	260.001
561.087	259.396
558.756	262.679
572.186	260.095
567.741	264.267
516.398	269.842
453.986	274.348
507.913	280.51
455.578	294.458
586.865	277.901
581.497	280.065
456.551	309.384
585.135	285.416
456.113	307.461
561.023	282.265
560.43	281.795
557.403	274.93
561.927	266.052
453.357	279.698
544.868	256.904
548.657	256.802
511.496	262.046
558.126	257.264
552.674	262.299
557.514	262.78
552.088	265.886
559.36	265.47
475.306	241.763
470.614	241.579
467.686	245.9
465.143	252.2
456.439	260.157
579.786	257.485
547.276	270.469
449.454	283.805
551.826	274.567
453.211	301.504
583.374	278.618
584.25	281.374
586.193	285.741
583.602	285.952
555.64	280.889
458.725	320.241
452.907	318.14
456.09	308.743
549.711	279.897
524.69	282.037
552.292	267.364
561.569	260.676
560.926	258.026
456.716	285.158
540.383	256.312
541.853	257.799
552.621	254.683
547.58	259.093
548.694	260.756
553.546	260.105
555.323	261.208
548.298	264.412
549.056	263.59
554.615	262.756
560.551	261.935
449.103	257.052
577.13	263.727
550.981	273.141
455.615	273.271
550.775	274.542
455.905	291.973
582.914	277.733
581.168	280.579
586.179	284.163
585.856	286.491
461.255	313.486
460.483	307.917
456.996	302.478
562.438	283.816
560.01	277.563
560.582	270.62
562.233	264.91
455.409	275.806
548.892	257.206
542.837	260.559
547.879	260.788
555.204	258.881
555.34	260.675
556.449	262.748
555.69	264.011
560.535	262.287
463.151	252.086
463.361	261.677
572.73	260.381
454.479	275.539
553.09	273.714
585.399	275.157
583.913	280.156
463.259	302.564
556.436	282.08
523.666	274.546
470.042	326.636
469.237	313.813
464.757	308.424
563.88	281.49
561.986	274.42
560.024	267.527
560.606	261.536
577.526	248.826
543.515	257.566
555.642	255.398
558.736	257.452
554.329	263.353
554.829	265.525
596.229	252.678
464.669	249.959
483.169	269.109
483.151	274.785
549.29	271.524
516.804	279.589
556.142	277.218
551.77	279.495
552.411	281.46
531.266	274.703
556.09	282.88
527.714	272.497
543.032	275.325
471.955	316.687
548.661	274.797
556.964	281.086
552.506	276.259
556.407	268.924
560.182	263.419
457.035	287.242
456.893	282.43
522.219	264.11
521.986	260.725
537.961	260.804
512.498	264.176
552.121	260.777
557.895	259.687
558.751	258.806
471.471	250.05
465.62	249.603
577.046	252.813
553.52	263.526
568.461	264.669
582.056	265.964
577.876	268.692
582.46	268.868
448.014	275.605
581.905	271.843
584.161	273.249
582.209	274.552
453.126	290.311
582.977	280.187
584.013	284.609
556.764	283.542
553.366	283.578
524.884	276.909
462.32	338.517
462.347	333.472
464.778	320.79
456.418	318.229
457.623	311.283
450.294	311.689
450.85	308.85
450.772	305.67
454.974	301.491
456.119	297.385
453.199	294.056
561.74	284.118
553.426	279.548
557.529	274.368
556.081	269.822
560.42	266.217
561.14	263.172
563.558	260.319
524.983	262.451
461.775	272.668
455.676	259.5
455.07	264.893
559.549	253.357
557.345	256.717
558.941	258.056
558.632	261.116
563.762	261.69
561.534	265.647
557.736	269.617
565.016	274.199
560.526	277.069
568.566	281.337
575.875	287.863
452.122	300.881
453.992	301.454
456.191	301.872
461.42	297.324
447.044	329.083
461.758	297.524
444.462	325.849
442.761	322.536
451.367	312.021
454.831	310.43
450.938	316.199
453.456	316.063
544.01	274.698
550.192	274.336
540.453	273.828
539.947	273.362
542.341	271.631
570.597	281.535
461.84	323.049
465.118	317.047
593.052	297.47
571.806	280.34
544.927	265.628
565.591	276.905
567.172	276.513
554.875	276.044
457.857	308.404
560.339	268.532
593.539	265.437
589.47	267.669
590.038	264.453
589.223	262.638
590.036	263.672
456.267	297.256
451.354	299.017
452.409	294.574
452.891	287.328
451.505	282.19
459.287	280.262
579.368	265.93
580.744	267.094
584.252	265.453
586.087	266.427
522.36	275.423
525.77	274.125
526.52	272.915
518.046	273.551
467.667	305.253
563.394	273.959
582.475	274.706
588.856	268.2
466.286	298.382
586.618	262.98
587.568	262.083
590.369	261.931
592.187	260.075
516.771	275.015
557.995	267.419
549.221	270.232
566.166	268.331
598.538	275.025
605.52	270.934
611.014	276.161
609.877	273.215
622.225	262.716
633.888	269.678
600.019	275.046
618.46	272.669
605.069	276.081
603.519	278.8
588.555	293.412
604.642	283.466
603.775	284.658
603.81	286.886
608.414	291.754
596.533	308.43
612.767	275.863
601.256	323.245
601.53	334.074
607.471	318.826
610.764	318.253
610.382	317.365
609.653	304.648
611.637	319.662
614.346	315.69
612.03	323.23
607.624	321.526
607.211	338.672
600.575	341.529
583.575	267.018
604.963	346.235
596.597	257.466
593.025	258.208
598.635	262.601
602.532	342.962
603.177	258.247
605.222	295.329
603.374	298.919
604.449	267.711
602.687	283.369
602.477	330.058
600.63	310.211
606.517	299.474
604.285	297.389
606.591	293.43
615.867	268.6
607.723	318.238
607.565	314.012
606.148	315.308
606.855	313.908
608.894	312.001
607.565	309.115
608.892	309.542
607.915	306.27
606.712	307.422
611.391	267.567
606.09	271.099
602.236	271.044
607.522	273.648
602.411	282.704
607.136	287.4
606.873	287.891
603.563	290.336
604.765	288.63
603.99	287.875
612.669	281.635
601.663	272.792
608.042	276.158
602.118	278.387
598.901	286.386
609.223	293.045
611.11	292.641
609.658	293.633
609.037	296.916
608.611	301.64
606.523	306.147
604.992	309.618
605.659	307.296
604.028	310.815
605.061	312.225
612.355	289.381
614.588	287.555
618.779	283.731
620.676	283.411
614.1	302.355
625.693	293.271
604.777	322.822
606.221	319.928
607.374	317.185
608.849	314.062
605.193	314.284
681.481	254.838
657.508	256.672
662.979	256.866
671.106	260.958
641.187	284.654
627.282	286.471
619.091	283.898
609.506	279.639
614.547	281.537
601.182	278.832
597.214	269.166
603.283	270.329
646.041	267.575
614.546	275.323
612.763	275.376
605.841	271.709
605.069	270.99
603.321	272.855
590.364	279.703
593.734	283.043
601.66	293.811
598.287	290.853
654.415	268.567
654.635	269.145
632.967	279.143
628.223	279.097
635.594	278.528
621.953	285.326
647.21	273.311
620.784	284.712
625.833	281.046
643.803	271.147
649.12	273.969
673.228	253.533
646.591	266.906
653.66	270.716
658.14	267.961
597.272	287.31
600.981	284.393
703.474	266.883
709.68	264.608
696.826	268.471
701.472	264.157
606.212	278.24
600.792	276.555
692.215	268.587
701.336	259.778
601.255	269.784
597.451	270.522
628.31	273.057
593.268	280.944
652.239	267.656
682.41	261.912
650.283	271.284
684.239	258.957
619.783	279.71
621.603	280.197
674.884	265.937
665.57	272.596
663.759	272.976
658.893	271.775
666.853	255.57
663.258	259.967
649.061	268.244
644.92	271.723
646.4	273.597
717.528	267.601
616.11	277.413
610.948	276.873
611.548	273.231
617.796	272.697
707.559	267.48
603.661	271.221
599.482	265.884
600.555	264.723
718.993	258.215
593.816	264.86
603.522	263.605
607.58	264.498
602.91	262.655
606.13	263.774
597.164	260.538
608.371	266.916
726.625	260.111
709.926	274.546
619.155	261.391
602.688	258.772
598.827	255.611
600.909	257.325
606.693	260.452
608.723	262.041
610.905	261.277
613.119	261.132
702.916	267.407
701.791	270.058
724.236	264.921
704.445	269.558
699.567	269.622
699.21	271.126
623.037	260.433
619.715	260.571
652.525	262.529
655.124	263.62
649.633	263.62
697.435	257.079
696.367	255.907
597.59	262.566
606.306	264.5
678.545	257.746
614.3	264.668
612.542	263.765
612.6	265.639
611.486	264.365
624.043	266.474
620.155	268.523
704.669	254.202
698.21	255.388
673.479	260.299
656.081	269.595
674.321	268.265
687.114	260.59
652.712	266.078
631.822	268.485
702.229	286.778
705.092	282.111
700.593	275.946
672.65	272.35
696.99	263.96
696.334	260.666
630.27	269.153
691.199	257.913
633.689	268.662
605.351	268.453
630.97	266.35
623.816	267.44
631.362	267.23
621.262	268.748
646.372	268.491
609.415	274.524
612.153	270.501
612.325	266.272
649.193	261.75
652.939	259.928
571.407	270.527
617.637	262.409
589.086	270.62
671.7	252.858
589.7	276.405
636.598	263.992
692.195	264.475
665.709	265.955
679.893	260.07
654.996	250.068
671.453	259.724
651.317	261.205
652.739	267.423
619.075	277.568
603.235	276.956
650.199	272.318
645.107	267.947
581.565	263.122
703.056	259.54
613.465	266.994
647.036	266.944
584.727	263.312
596.239	266.198
592.561	264.75
574.544	267.712
574.274	264.977
603.762	266.175
605.264	265.343
664.647	266.315
596.418	266.307
591.141	265.096
592.525	267.705
572.875	262.698
592.387	268.893
598.542	270.276
607.302	271.907
592.57	272.582
598.871	273.016
619.551	267.594
595.409	273.299
596.553	273.087
583.913	269.802
590.703	273.827
675.263	252.713
671.165	256.434
656.559	264.244
630.61	275.834
619.233	275.615
675.631	257.131
623.839	281.343
643.126	276.03
644.803	274.085
646.661	271.769
677.865	256.573
620.403	273.406
683.596	250.599
648.531	262.463
634.259	270.538
627.142	273.812
626.945	272.691
616.453	289.192
654.865	267.72
618.496	284.287
620.909	282.967
618.587	281.465
610.563	279.541
614.445	268.079
618.519	270.165
637.318	265.439
643.484	261.97
611.819	265.954
600.819	265.422
609.762	271.447
596.997	296.041
685.073	254.026
684.383	251.862
599.679	281.657
592.407	295.223
677.794	250.861
675.494	250.683
655.812	262.267
660.114	258.349
663.362	257.576
667.929	253.28
577.817	260.435
576.771	258.623
614.484	295.108
608.11	297.44
612.716	294.3
603.92	295.889
593.866	290.712
586.844	275.342
587.762	270.783
608.781	289.677
601.002	277.363
576.031	274.27
563.815	271.434
594.749	277.823
580.869	276.683
585.855	273.793
589.575	271.691
580.928	267.815
589.207	271.433
580.298	266.466
579.708	261.347
579.611	262.377
587.929	262.702
599.773	263.024
620.82	269.466
592.621	261.305
559.674	267.341
554.526	268.699
551.76	273.575
520.15	262.311
534.511	280.563
516.543	299.937
571.216	272.443
576.129	293.377
516.395	280.789
576.562	292.045
550.033	278.43
552.237	285.425
573.285	277.024
588.819	270.658
531.265	267.182
551.893	267.946
543.024	268.872
532.879	270.224
519.399	279.147
526.951	373.678
521.239	285.705
530.051	350.84
524.427	317.009
509.93	263.992
509.844	273.795
507.802	273.226
518.596	306.962
518.262	306.642
509.073	279.655
532.535	358.145
523.213	340.827
532.196	373.225
533.541	365.402
539.369	355.851
501.816	290.658
518.985	322.983
497.024	302.121
508.832	303.345
498.792	307.096
505.866	304.875
498.956	308.838
510.577	310.865
498.897	310.749
495.22	311.757
504.771	314.089
501.935	311.053
504.821	315.963
505.273	317.497
503.031	317.632
506.024	320.982
504.936	322.675
552.236	352.45
536.981	381.37
554.128	362.065
543.822	371.557
542.202	372.362
525.375	388.669
539.764	374.181
540.869	372.732
539.326	369.646
540.316	370.893
540.066	369.788
536.956	372.301
540.118	367.55
537.959	371.033
538.497	368.566
538.763	371.508
537.811	364.509
536.915	376.98
536.417	368.713
523.805	380.2
527.725	376.166
529.363	371.59
529.787	367.694
521.998	369.856
533.64	369.843
518.843	375.708
528.914	371.867
516.459	374.376
523.274	374.823
533.047	372.186
524.969	373.127
536.991	361.461
531.995	370.542
537.362	356.174
526.412	370.869
531.779	360.702
528.384	350.99
520.549	348.074
521.253	356.99
527.842	358.186
515.777	358.668
531.791	356.444
531.565	357.918
534.512	353.416
518.734	354.784
519.854	348.671
525.551	350.558
522.401	343.916
518.05	362.174
519.547	357.282
510.249	378.395
508.209	386.201
521.319	362.679
515.806	355.508
510.554	380.062
525.649	336.749
524.088	335.866
513.802	383.68
516.003	382.282
513.115	371.89
523.658	329.991
515.294	376.12
523.653	327.556
515.626	375.75
521.95	325.38
519.936	372.51
524.1	382.532
522.881	385.383
522.465	385.229
521.325	386.56
519.411	384.521
517.395	387.002
513.327	388.169
515.58	410.045
517.611	430.622
515.791	424.022
519.401	426.768
517.817	387.142
516.877	391.321
515.964	383.826
512.092	370.674
515.993	386.621
516.583	396.925
513.859	391.14
515.055	397.537
516.014	403.337
515.773	409.025
504.332	331.791
509.075	384.48
516.53	425.976
513.653	419.945
522.161	428.519
518.989	423.601
514.817	419.841
525.727	437.538
523.517	440.241
512.823	418.721
508.295	416.578
512.363	412.365
508.151	408.554
505.216	360.884
515.453	382.893
491.857	327.872
516.176	418.149
497.192	351.191
482.906	328.141
501.79	439.109
516.606	383.422
515.743	378.581
505.274	435.371
522.172	411.221
522.091	402.715
514.635	412.476
511.059	419.784
509.56	439.345
525.037	409.523
529.677	412.676
521.495	404.737
515.274	396.163
511.396	382.14
513.7	395.168
563.754	452.266
539.104	441.044
535.093	441.841
530.826	439.404
524.087	435.148
518.206	427.917
518.774	459.54
501.643	365.958
514.462	387.527
513.38	449.393
517.019	446.036
474.649	339.71
509.049	446.052
504.717	447.681
514.783	439.236
510.01	441.046
505.688	442.762
508.127	440.226
512.126	437.024
516.578	436.246
511.891	437.848
508.663	434.574
516.638	432.021
507.342	433.328
516.794	403.929
504.482	393.276
506.743	386.512
505.482	383.708
504.219	380.096
503.07	378.783
512.973	392.097
505.542	457.958
513.929	453.46
495.305	343.846
500.304	342.811
501.869	347.767
501.918	349.393
504.244	344.953
511.662	355.754
554.744	459.184
517.962	369.509
540.191	461.221
536.004	461.66
527.758	453.7
521.51	438.677
518.072	436.003
520.929	457.757
512.915	378.551
513.201	375.576
534.056	480.546
532.86	466.118
528.698	469.607
528.478	467.037
527.495	445.629
520.275	398.67
524.736	433.679
526.507	459.346
525.932	469.522
523.582	474.503
522.205	465.647
517.372	370.379
517.262	366.9
514.34	352.098
517.452	487.096
519.066	468.298
509.411	497.173
521.669	454.983
519.362	450.575
518.657	442.204
512.512	370.151
516.319	462.277
516.129	464.047
519.99	481.975
521.86	479.942
523.007	427.921
523.349	431.758
524.311	448.607
521.595	415.427
536.763	444.051
541.985	463.621
522.542	415.613
515.685	368.097
530.392	471.346
532.619	466.439
531.984	463.743
516.268	348.665
556.037	479.335
516.601	365.361
514.959	360.813
521.594	436.07
526.413	431.144
510.369	362.106
510.776	359.627
523.216	429.146
522.24	419.886
518.658	396.882
518.49	393.154
534.809	465.409
530.019	459.727
541.719	456.852
538.165	453.016
522.848	428.254
516.792	366.289
556.374	467.956
550.889	465.899
542.695	462.203
522.051	414.012
518.71	397.648
534.624	466.574
542.761	468.497
536.266	459.011
531.331	449.173
534.89	452.051
513.697	375.899
529.229	421.866
535.698	438.576
568.508	488.866
558.39	473.696
589.989	499.886
535.804	448.336
563.818	467.611
556.297	462.025
552.191	457.789
576.481	476.944
596.226	505.662
577.822	491.027
587.105	505.27
574.199	480.403
586.37	505.851
560.188	469.11
558.031	473.254
578.867	503.25
626.705	547.569
614.995	544.724
637.505	560.664
620.444	552.647
635.393	548.228
603.39	527.098
599.06	519.12
588.712	510.676
583.392	507.555
601.432	522.334
610.584	532.575
701.559	587.51
718.454	578.422
713.793	572.001
710.38	570.253
710.645	586.302
678.569	569.354
679.016	574.412
688.584	582.151
683.568	587.537
674.714	582.816
683.385	592.3
677.716	586.567
667.063	576.62
701.856	606.446
694.208	599.924
691.865	590.753
656.041	569.817
666.761	570.149
679.134	575.053
678.295	574.999
718.165	587.42
716.716	585.903
728.273	597.572
726.752	588.436
717.466	578.282
714.946	592.137
708.762	580.618
691.982	586.394
691.273	592.854
685.189	591.155
723.257	648.44
720.097	644.09
700.228	615.005
704.886	614.647
668.528	575.857
665.627	574.631
661.361	572.604
657.662	571.355
704.195	617.29
679.004	596.857
699.386	615.033
701.594	612.62
702.369	595.019
691.352	586.382
710.438	604.379
711.527	602.609
718.656	613.475
704.625	604.226
701.007	608.233
700.401	619.12
683.633	582.524
683.755	589.622
690.859	598.917
769.199	690.675
697.514	609.173
750.549	676.817
727.57	669.26
730.174	654.033
714.663	635.908
732.371	642.615
737.044	643.355
758.578	654.848
735.891	640.004
739.477	643.489
740.847	644.879
714.448	628.047
778.486	670.081
779.847	668.107
721.205	643.459
736.504	648.046
789.526	671.791
773.925	665.297
748.2	654.09
707.292	638.017
799.716	672.157
764.595	661.746
767.167	665.534
731.45	665.832
767.298	673.445
822.788	673.939
821.016	675.879
782.718	678.591
745.837	686.128
769.953	680.288
778.167	673.997
768.299	685.975
742.221	693.88
805.83	690.908
840.129	684.992
833.013	680.292
834.874	678.247
823.555	682.585
821.592	682.608
814.504	675.987
783.638	688.612
799.073	676.68
783.449	677.449
789.056	664.239
784.789	665.83
738.514	698.415
811.892	642.936
777.57	671.406
810.816	654.21
715.899	707.598
799.986	657.395
778.112	672.922
784.185	681.836
817.212	674.706
819.907	670.585
828.53	653.784
798.31	669.981
796.346	668.694
819.677	645.602
760.843	688.33
832.043	621.113
830.525	618.588
779.639	681.659
841.619	590.532
832.125	603.586
822.95	623.906
818.447	631.526
829.889	629.914
812.545	642.342
815.279	639.204
812.888	641.919
810.049	645.452
806.141	649.12
807.651	648.944
832.071	627.721
826.091	633.002
774.912	664.91
796.531	661.987
799.23	660.856
840.768	634.949
826.01	645.899
821.802	647.896
831.953	643.227
822.6	631.65
818.079	653.086
833.183	624.706
815.932	655.262
823.636	634.979
812.849	658.139
803.045	659.514
809.302	662.54
853.994	611.872
854.667	619.412
798.654	666.168
853.396	619.278
850.497	625.109
831.501	632.21
828.486	632.661
846.975	614.79
827.944	642.303
841.032	621.319
826.05	632.021
835.523	635.832
839.801	627.836
839.52	623.855
838.184	624.921
850.53	601.929
833.565	622.681
835.718	619.591
845.646	603.571
811.098	661.172
843.762	591.832
841.077	614.489
830.289	624.206
839.69	618.421
853.568	610.046
825.886	639.496
843.009	622.391
835.242	630.546
825.674	638.707
810.524	655.64
833.708	630.375
835.758	631.832
833.904	634.445
852.448	617.176
811.236	661.211
857.087	608.221
836.44	633.301
857.521	610.573
792.976	668.296
854.113	604.756
854.481	610.321
854.715	609.022
849.893	616.549
850.222	611.729
850.122	605.389
806.482	666.271
848.98	599.269
847.952	599.471
847.996	586.092
832.991	647.11
830.58	650.848
840.91	621.275
840.614	623.536
843.583	610.388
820.059	666.883
831.852	635.73
[truncated: 4,262 more rows]

## Sheet: Fig. 3c-Channel
Worm centroid
X (pixel)	Y (pixel)
503.684	272.208
490.824	273.276
465.349	270.136
453.527	271.52
449.796	273.345
439.869	274.517
429.11	275.891
409.692	273.008
403.316	272.971
386.002	279.209
372.543	275.836
359.665	274.103
341.589	273.953
325.379	270.985
324.353	269.725
317.919	269.854
286.992	271.853
291.763	274.998
235.516	273.358
263.01	273.66
247.117	273.68
225.833	273.35

## Sheet: Fig. 4b
Time (s)	Angle ˚
0	6.2
2	13.5
4	14.7
6	29.2

## Sheet: Fig. 6b
Worm centroid
X (pixel)	Y (pixel)
231.444	244.773
227.295	245.734
214.873	242.355
211.353	239.106
223.931	251.563
218.834	243.089
220.909	232.888
226.101	236.999
222.472	248.81
222.421	244.583
221.376	244.455
220.912	238.988
204.658	261.526
207.712	260.063
206.088	239.598
205.827	235.439
206.989	256.651
208.684	244.385
206.481	248.991
209.422	248.62
205.22	248.31
207.719	262.413
200.183	246.419
199.073	253.435
201.963	257.309
227.116	233.335
239.822	242.056
264.055	264.219
201.366	260.886
261.612	262.713
208.034	263.768
218.242	264.854
271.657	249.62
264.389	258.244
254.565	254.386
274.327	256.3
287.69	260.909
304.904	257.272
313.285	247.357
362.231	232.538
370.595	236.636
387.619	244.23
373.403	237.496
376.094	233.731
379.335	230.247
404.233	232.941
412.619	239.114
396.302	231.846
382.68	232.251
395.323	232.723
412.555	231.819
450.438	249.05
433.757	237.287
444.617	238.77
493.4	257.944
444.551	241.287
484.955	260.015
465.811	260.252
445.123	259.245
483.664	257.569
476.079	258.04
491.134	258.311
510.546	249.106
552.338	236.565
552.795	238.56
534.322	235.267
558.069	240.958
572.488	259.149
565.953	248.062
573.46	259.004
580.347	275.959
584.893	272.136
585.419	302.523
585.339	312.265
583.859	328.874
589.511	318.187
588.562	350.301
588.576	375.491
585.971	360.067
583.861	364.669
582.563	371.786
582.223	387.455
572.571	417.6
576.843	388.512
576.111	396.249
572.914	394.355
571.258	417.401
571.014	403.57
570.466	414.587
570.786	438.957
569.383	445.149

## Sheet: Fig. 6c
Maze direction	Without food	With food
Left	49	71
Right	51	29

## Sheet: Fig. SI3
0 Minute		5 min		10 min		15 min		20 min		25 min
Wavelength	Transmittance	Wavelength	Transmittance	Wavelength	Transmittance	Wavelength	Transmittance	Wavelength	Transmittance	Wavelength	Transmittance
599.763	74.689	599.763	75.5368	599.763	76.593	599.763	77.0611	599.763	77.8171	599.763	80.1697
600.245	74.7349	600.245	75.5917	600.245	76.7454	600.245	77.1117	600.245	77.8623	600.245	80.2668
600.727	74.8024	600.727	75.6633	600.727	76.8942	600.727	77.1617	600.727	77.9397	600.727	80.3779
601.209	74.8898	601.209	75.7493	601.209	77.0174	601.209	77.2054	601.209	78.0334	601.209	80.4961
601.691	74.9946	601.691	75.8473	601.691	77.1011	601.691	77.2411	601.691	78.1305	601.691	80.6147
602.173	75.1124	602.173	75.9544	602.173	77.1416	602.173	77.2722	602.173	78.223	602.173	80.7279
602.655	75.2347	602.655	76.0656	602.655	77.1455	602.655	77.3056	602.655	78.3068	602.655	80.8284
603.138	75.3492	603.138	76.1733	603.138	77.1257	603.138	77.3473	603.138	78.3786	603.138	80.9075
603.62	75.4423	603.62	76.268	603.62	77.0974	603.62	77.3996	603.62	78.4346	603.62	80.956
604.102	75.5037	604.102	76.3402	604.102	77.0725	604.102	77.4591	604.102	78.4694	604.102	80.9664
604.584	75.5313	604.584	76.383	604.584	77.058	604.584	77.5165	604.584	78.4777	604.584	80.9367
605.066	75.5334	605.066	76.3935	605.066	77.0542	605.066	77.561	605.066	78.4582	605.066	80.8721
605.548	75.5255	605.548	76.3728	605.548	77.0572	605.548	77.5834	605.548	78.4152	605.548	80.7842
606.03	75.5256	606.03	76.3258	606.03	77.0601	606.03	77.5803	606.03	78.3602	606.03	80.6893
606.513	75.546	606.513	76.2597	606.513	77.0567	606.513	77.5548	606.513	78.3091	606.513	80.6035
606.995	75.588	606.995	76.1822	606.995	77.0423	606.995	77.5158	606.995	78.2781	606.995	80.5389
607.477	75.6413	607.477	76.1028	607.477	77.0156	607.477	77.4753	607.477	78.2784	607.477	80.5013
607.959	75.6881	607.959	76.0314	607.959	76.9785	607.959	77.445	607.959	78.3129	607.959	80.4903
608.441	75.7105	608.441	75.9789	608.441	76.9364	608.441	77.4326	608.441	78.375	608.441	80.5011
608.923	75.6994	608.923	75.9562	608.923	76.8961	608.923	77.4415	608.923	78.4518	608.923	80.5272
609.405	75.6582	609.405	75.9716	609.405	76.8662	609.405	77.4691	609.405	78.528	609.405	80.5618
609.887	75.6016	609.887	76.028	609.887	76.8534	609.887	77.5081	609.887	78.591	609.887	80.5992
610.369	75.5506	610.369	76.1208	610.369	76.8619	610.369	77.5482	610.369	78.6332	610.369	80.6341
610.852	75.523	610.852	76.2373	610.852	76.8906	610.852	77.5774	610.852	78.6542	610.852	80.6607
611.334	75.5268	611.334	76.359	611.334	76.9335	611.334	77.585	611.334	78.6578	611.334	80.674
611.816	75.5571	611.816	76.4653	611.816	76.9796	611.816	77.5633	611.816	78.6513	611.816	80.6701
612.298	75.599	612.298	76.5378	612.298	77.0164	612.298	77.5103	612.298	78.6414	612.298	80.6489
612.78	75.633	612.78	76.5639	612.78	77.0318	612.78	77.4298	612.78	78.6332	612.78	80.6145
613.262	75.6435	613.262	76.5387	613.262	77.0192	613.262	77.3321	613.262	78.6291	613.262	80.5742
613.744	75.624	613.744	76.4638	613.744	76.9779	613.744	77.2308	613.744	78.6295	613.744	80.5364
614.226	75.5788	614.226	76.3464	614.226	76.9151	614.226	77.1407	614.226	78.6324	614.226	80.5069
614.709	75.5198	614.709	76.1967	614.709	76.8424	614.709	77.0735	614.709	78.6343	614.709	80.4862
615.191	75.4622	615.191	76.0282	615.191	76.7745	615.191	77.0361	615.191	78.6308	615.191	80.471
615.673	75.4191	615.673	75.8568	615.673	76.724	615.673	77.0297	615.673	78.6178	615.673	80.456
616.155	75.3985	616.155	75.7014	616.155	76.6999	616.155	77.05	616.155	78.5923	616.155	80.4393
616.637	75.4031	616.637	75.5829	616.637	76.7055	616.637	77.0898	616.637	78.555	616.637	80.4252
617.119	75.4312	617.119	75.521	617.119	76.7393	617.119	77.1412	617.119	78.5097	617.119	80.4251
617.601	75.4783	617.601	75.5293	617.601	76.7952	617.601	77.1966	617.601	78.4635	617.601	80.4536
618.083	75.539	618.083	75.6117	618.083	76.8658	618.083	77.2496	618.083	78.4248	618.083	80.5223
618.566	75.607	618.566	75.7586	618.566	76.9432	618.566	77.2963	618.566	78.3996	618.566	80.6335
619.048	75.6751	619.048	75.949	619.048	77.0209	619.048	77.3349	619.048	78.3892	619.048	80.7768
619.53	75.7369	619.53	76.1557	619.53	77.0947	619.53	77.3666	619.53	78.3893	619.53	80.9311
620.012	75.7862	620.012	76.3518	620.012	77.1624	620.012	77.3951	620.012	78.3906	620.012	81.0717
620.494	75.821	620.494	76.5181	620.494	77.223	620.494	77.4266	620.494	78.3834	620.494	81.1792
620.976	75.8426	620.976	76.6463	620.976	77.277	620.976	77.4677	620.976	78.3615	620.976	81.2461
621.458	75.8563	621.458	76.738	621.458	77.3246	621.458	77.5222	621.458	78.3264	621.458	81.2798
621.94	75.8685	621.94	76.8005	621.94	77.3656	621.94	77.5887	621.94	78.2875	621.94	81.2977
622.423	75.8842	622.423	76.8405	622.423	77.3998	622.423	77.6586	622.423	78.2602	622.423	81.3192
622.905	75.904	622.905	76.8606	622.905	77.4273	622.905	77.7182	622.905	78.2602	622.905	81.3562
623.387	75.9232	623.387	76.8578	623.387	77.449	623.387	77.7516	623.387	78.2982	623.387	81.407
623.869	75.9337	623.869	76.8256	623.869	77.4678	623.869	77.7474	623.869	78.3743	623.869	81.4566
624.351	75.9275	624.351	76.7605	624.351	77.4876	624.351	77.7028	624.351	78.4783	624.351	81.483
624.833	75.9004	624.833	76.664	624.833	77.5137	624.833	77.6257	624.833	78.5914	624.833	81.4656
625.315	75.8536	625.315	76.5464	625.315	77.5502	625.315	77.5341	625.315	78.6933	625.315	81.3949
625.797	75.7941	625.797	76.424	625.797	77.5997	625.797	77.45	625.797	78.7677	625.797	81.2764
626.279	75.731	626.279	76.314	626.279	77.6608	626.279	77.3922	626.279	78.8081	626.279	81.129
626.762	75.673	626.762	76.2305	626.762	77.7294	626.762	77.3732	626.762	78.8203	626.762	80.9802
627.244	75.6261	627.244	76.1813	627.244	77.798	627.244	77.3952	627.244	78.8198	627.244	80.8571
627.726	75.5928	627.726	76.166	627.726	77.8587	627.726	77.4531	627.726	78.8263	627.726	80.7806
628.208	75.5742	628.208	76.1785	628.208	77.9033	628.208	77.5377	628.208	78.8574	628.208	80.7612
628.69	75.5706	628.69	76.2097	628.69	77.9261	628.69	77.6391	628.69	78.9217	628.69	80.7983
629.172	75.5834	629.172	76.2494	629.172	77.9238	629.172	77.7488	629.172	79.0166	629.172	80.8822
629.654	75.612	629.654	76.2871	629.654	77.8962	629.654	77.8592	629.654	79.1282	629.654	80.9968
630.136	75.652	630.136	76.3123	630.136	77.8459	630.136	77.9612	630.136	79.2364	630.136	81.1218
630.619	75.6922	630.619	76.3136	630.619	77.7781	630.619	78.0443	630.619	79.321	630.619	81.2355
631.101	75.7165	631.101	76.2811	631.101	77.6997	631.101	78.0986	631.101	79.3693	631.101	81.3173
631.583	75.7083	631.583	76.2077	631.583	77.6198	631.583	78.1172	631.583	79.3791	631.583	81.3519
632.065	75.6564	632.065	76.0935	632.065	77.5466	632.065	78.1005	632.065	79.3592	632.065	81.3316
632.547	75.5624	632.547	75.9468	632.547	77.4886	632.547	78.0587	632.547	79.3261	632.547	81.2597
633.029	75.4423	633.029	75.7843	633.029	77.4502	633.029	78.0082	633.029	79.2961	633.029	81.1499
633.511	75.324	633.511	75.6286	633.511	77.4334	633.511	77.9671	633.511	79.2802	633.511	81.0235
633.994	75.2391	633.994	75.5028	633.994	77.4355	633.994	77.9484	633.994	79.2796	633.994	80.9049
634.476	75.2114	634.476	75.4257	634.476	77.4531	634.476	77.9553	634.476	79.2875	634.476	80.8156
634.958	75.2496	634.958	75.4089	634.958	77.4817	634.958	77.9824	634.958	79.2928	634.958	80.7703
635.44	75.3433	635.44	75.455	635.44	77.5204	635.44	78.0178	635.44	79.2859	635.44	80.774
635.922	75.4681	635.922	75.56	635.922	77.5708	635.922	78.052	635.922	79.2654	635.922	80.8237
636.404	75.5923	636.404	75.7134	636.404	77.6381	636.404	78.0808	636.404	79.2362	636.404	80.9093
636.886	75.6886	636.886	75.9011	636.886	77.727	636.886	78.1072	636.886	79.21	636.886	81.0176
637.368	75.739	637.368	76.1039	637.368	77.8401	637.368	78.1354	637.368	79.1955	637.368	81.1305
637.851	75.7391	637.851	76.2995	637.851	77.9745	637.851	78.1659	637.851	79.1948	637.851	81.2291
638.333	75.6938	638.333	76.4634	638.333	78.122	638.333	78.1904	638.333	79.2	638.333	81.2943
638.815	75.6122	638.815	76.5728	638.815	78.2694	638.815	78.1925	638.815	79.1963	638.815	81.3098
639.297	75.502	639.297	76.6098	639.297	78.4024	639.297	78.1541	639.297	79.167	639.297	81.2678
639.779	75.3683	639.779	76.5685	639.779	78.5054	639.779	78.0647	639.779	79.1026	639.779	81.1718
640.261	75.216	640.261	76.456	640.261	78.5662	640.261	77.9301	640.261	79.0036	640.261	81.039
640.743	75.0543	640.743	76.2928	640.743	78.575	640.743	77.7734	640.743	78.8828	640.743	80.8989
641.225	74.9009	641.225	76.1091	641.225	78.5286	641.225	77.6284	641.225	78.7591	641.225	80.7862
641.707	74.783	641.707	75.9378	641.707	78.4306	641.707	77.5291	641.707	78.6509	641.707	80.7314
642.19	74.731	642.19	75.8072	642.19	78.2943	642.19	77.4963	642.19	78.5705	642.19	80.7526
642.672	74.7726	642.672	75.7365	642.672	78.143	642.672	77.5309	642.672	78.5229	642.672	80.8494
643.154	74.9218	643.154	75.7315	643.154	78.0076	643.154	77.6145	643.154	78.5062	643.154	81.004
643.636	75.1725	643.636	75.7863	643.636	77.9194	643.636	77.7175	643.636	78.5176	643.636	81.1849
644.118	75.4951	644.118	75.8854	644.118	77.9033	644.118	77.8106	644.118	78.5565	644.118	81.3558
644.6	75.8421	644.6	76.0081	644.6	77.9673	644.6	77.8741	644.6	78.6248	644.6	81.4847
645.082	76.1556	645.082	76.1328	645.082	78.0985	645.082	77.9022	645.082	78.725	645.082	81.5503
645.564	76.3827	645.564	76.2406	645.564	78.2626	645.564	77.9001	645.564	78.8541	645.564	81.5463
646.047	76.4879	646.047	76.3213	646.047	78.4162	646.047	77.88	646.047	79.003	646.047	81.4829
646.529	76.4643	646.529	76.3745	646.529	78.5178	646.529	77.8532	646.529	79.1566	646.529	81.3819
647.011	76.3355	647.011	76.4103	647.011	78.545	647.011	77.8276	647.011	79.2991	647.011	81.2734
647.493	76.1495	647.493	76.4469	647.493	78.4997	647.493	77.8075	647.493	79.4208	647.493	81.1871
647.975	75.9665	647.975	76.5047	647.975	78.4082	647.975	77.7984	647.975	79.5226	647.975	81.1478
648.457	75.8435	648.457	76.5988	648.457	78.3093	648.457	77.8082	648.457	79.6141	648.457	81.168
648.939	75.8199	648.939	76.734	648.939	78.2397	648.939	77.8471	648.939	79.7091	648.939	81.2461
649.422	75.9084	649.422	76.9006	649.422	78.2201	649.422	77.9233	649.422	79.8166	649.422	81.3659
649.904	76.0931	649.904	77.0768	649.904	78.2488	649.904	78.0383	649.904	79.9342	649.904	81.5001
650.386	76.3347	650.386	77.2351	650.386	78.3027	650.386	78.1838	650.386	80.0478	650.386	81.6177
650.868	76.5837	650.868	77.3504	650.868	78.3502	650.868	78.3402	650.868	80.1344	650.868	81.6923
651.35	76.7939	651.35	77.4079	651.35	78.3619	651.35	78.4845	651.35	80.1745	651.35	81.7093
651.832	76.9352	651.832	77.4087	651.832	78.3247	651.832	78.5963	651.832	80.1602	651.832	81.6697
652.314	76.9994	652.314	77.3667	652.314	78.2431	652.314	78.6655	652.314	80.1005	652.314	81.5894
652.796	76.9994	652.796	77.3052	652.796	78.1389	652.796	78.6963	652.796	80.0197	652.796	81.4932
653.279	76.9631	653.279	77.2479	653.279	78.0392	653.279	78.7036	653.279	79.9482	653.279	81.4068
653.761	76.9221	653.761	77.2137	653.761	77.9696	653.761	78.7084	653.761	79.9121	653.761	81.3512
654.243	76.9037	654.243	77.2128	654.243	77.9452	654.243	78.7287	654.243	79.9234	654.243	81.3374
654.725	76.9236	654.725	77.2467	654.725	77.9701	654.725	78.7741	654.725	79.9779	654.725	81.3677
655.207	76.985	655.207	77.312	655.207	78.0379	655.207	78.843	655.207	80.0589	655.207	81.436
655.689	77.0793	655.689	77.4012	655.689	78.1373	655.689	78.9245	655.689	80.1435	655.689	81.531
656.171	77.192	656.171	77.5069	656.171	78.2538	656.171	79.0023	656.171	80.2131	656.171	81.6398
656.653	77.3068	656.653	77.6204	656.653	78.373	656.653	79.0608	656.653	80.2575	656.653	81.7474
657.135	77.4094	657.135	77.7322	657.135	78.481	657.135	79.0892	657.135	80.2765	657.135	81.8395
657.618	77.4905	657.618	77.8323	657.618	78.5649	657.618	79.0837	657.618	80.276	657.618	81.9034
658.1	77.5469	658.1	77.9121	658.1	78.6148	658.1	79.0493	658.1	80.2648	658.1	81.9309
658.582	77.5805	658.582	77.9657	658.582	78.6252	658.582	78.9969	658.582	80.2489	658.582	81.9211
659.064	77.5976	659.064	77.9935	659.064	78.5981	659.064	78.9408	659.064	80.2307	659.064	81.8816
659.546	77.6056	659.546	78.0014	659.546	78.5426	659.546	78.8959	659.546	80.209	659.546	81.8275
660.028	77.6123	660.028	78.0007	660.028	78.4741	660.028	78.8738	660.028	80.1822	660.028	81.7793
660.51	77.6225	660.51	78.0029	660.51	78.4106	660.51	78.8803	660.51	80.1499	660.51	81.7554
660.992	77.6375	660.992	78.0165	660.992	78.3672	660.992	78.9133	660.992	80.1136	660.992	81.7676
661.475	77.6542	661.475	78.0424	661.475	78.3527	661.475	78.9637	661.475	80.0756	661.475	81.8163
661.957	77.6662	661.957	78.074	661.957	78.3662	661.957	79.0172	661.957	80.0384	661.957	81.8906
662.439	77.6658	662.439	78.0987	662.439	78.3993	662.439	79.058	662.439	80.002	662.439	81.9704
662.921	77.6468	662.921	78.1034	662.921	78.4378	662.921	79.0731	662.921	79.9653	662.921	82.0337
663.403	77.6071	663.403	78.0794	663.403	78.4683	663.403	79.0569	663.403	79.9265	663.403	82.0628
663.885	77.5498	663.885	78.0264	663.885	78.4805	663.885	79.0118	663.885	79.8854	663.885	82.0491
664.367	77.4837	664.367	77.9532	664.367	78.4715	664.367	78.9475	664.367	79.8442	664.367	81.9952
664.85	77.4211	664.85	77.8749	664.85	78.4446	664.85	78.8779	664.85	79.8077	664.85	81.9127
665.332	77.3747	665.332	77.8087	665.332	78.409	665.332	78.8169	665.332	79.7815	665.332	81.8181
665.814	77.3542	665.814	77.7687	665.814	78.3754	665.814	78.7749	665.814	79.77	665.814	81.728
666.296	77.3644	666.296	77.7626	666.296	78.3547	666.296	78.7559	666.296	79.7741	666.296	81.6562
666.778	77.4039	666.778	77.7905	666.778	78.3541	666.778	78.7591	666.778	79.7919	666.778	81.6115
667.26	77.4657	667.26	77.8465	667.26	78.377	667.26	78.7802	667.26	79.8188	667.26	81.5984
667.742	77.539	667.742	77.9211	667.742	78.4216	667.742	78.8135	667.742	79.8488	667.742	81.6177
668.224	77.6123	668.224	78.0045	668.224	78.4829	668.224	78.8551	668.224	79.878	668.224	81.668
668.707	77.6757	668.707	78.089	668.707	78.553	668.707	78.9029	668.707	79.9049	668.707	81.7454
669.189	77.7231	669.189	78.1695	669.189	78.6245	669.189	78.9565	669.189	79.9306	669.189	81.8437
669.671	77.7529	669.671	78.2435	669.671	78.6914	669.671	79.0162	669.671	79.9574	669.671	81.9547
670.153	77.7671	670.153	78.3094	670.153	78.7513	670.153	79.0813	670.153	79.9874	670.153	82.0685
670.635	77.7708	670.635	78.3666	670.635	78.8054	670.635	79.1502	670.635	80.0217	670.635	82.1746
671.117	77.7707	671.117	78.4143	671.117	78.8578	671.117	79.22	671.117	80.0593	671.117	82.2642
671.599	77.7736	671.599	78.4525	671.599	78.9135	671.599	79.288	671.599	80.0982	671.599	82.3319
672.081	77.7858	672.081	78.4823	672.081	78.9765	672.081	79.3524	672.081	80.1359	672.081	82.3767
672.563	77.812	672.563	78.506	672.563	79.0477	672.563	79.4128	672.563	80.1708	672.563	82.4018
673.046	77.8542	673.046	78.527	673.046	79.1245	673.046	79.4694	673.046	80.2018	673.046	82.4139
673.528	77.9119	673.528	78.5491	673.528	79.2008	673.528	79.5224	673.528	80.2289	673.528	82.4198
674.01	77.9803	674.01	78.5743	674.01	79.2691	674.01	79.5702	674.01	80.2521	674.01	82.4255
674.492	78.0521	674.492	78.6033	674.492	79.3221	674.492	79.6098	674.492	80.2711	674.492	82.4338
674.974	78.1178	674.974	78.6346	674.974	79.3548	674.974	79.6363	674.974	80.2853	674.974	82.4447
675.456	78.1686	675.456	78.6653	675.456	79.3657	675.456	79.6455	675.456	80.2947	675.456	82.4564
675.938	78.1981	675.938	78.6932	675.938	79.357	675.938	79.6351	675.938	80.3	675.938	82.4669
676.42	78.2046	676.42	78.717	676.42	79.3335	676.42	79.6067	676.42	80.3033	676.42	82.475
676.903	78.1921	676.903	78.7378	676.903	79.3023	676.903	79.5657	676.903	80.308	676.903	82.4816
677.385	78.1691	677.385	78.7585	677.385	79.2704	677.385	79.5214	677.385	80.3173	677.385	82.4892
677.867	78.1467	677.867	78.7825	677.867	79.2446	677.867	79.4834	677.867	80.333	677.867	82.5011
678.349	78.1349	678.349	78.8125	678.349	79.2293	678.349	79.4602	678.349	80.3552	678.349	82.5198
678.831	78.1403	678.831	78.8491	678.831	79.2272	678.831	79.4565	678.831	80.3813	678.831	82.5463
679.313	78.164	679.313	78.8902	679.313	79.2378	679.313	79.4724	679.313	80.4073	679.313	82.5793
679.795	78.2022	679.795	78.9319	679.795	79.2589	679.795	79.5041	679.795	80.4288	679.795	82.6158
680.278	78.2482	680.278	78.9695	680.278	79.2861	680.278	79.5453	680.278	80.4432	680.278	82.6519
680.76	78.2949	680.76	78.9993	680.76	79.3151	680.76	79.5896	680.76	80.4501	680.76	82.6839
681.242	78.3371	681.242	79.0201	681.242	79.3422	681.242	79.6325	681.242	80.4525	681.242	82.7094
681.724	78.3736	681.724	79.034	681.724	79.3664	681.724	79.6722	681.724	80.455	681.724	82.7284
682.206	78.4059	682.206	79.0452	682.206	79.3888	682.206	79.7093	682.206	80.4627	682.206	82.7428
682.688	78.4374	682.688	79.0597	682.688	79.4129	682.688	79.746	682.688	80.4797	682.688	82.7561
683.17	78.4713	683.17	79.0827	683.17	79.4429	683.17	79.7848	683.17	80.5073	683.17	82.7723
683.652	78.5083	683.652	79.1171	683.652	79.4816	683.652	79.8265	683.652	80.5439	683.652	82.7947
684.135	78.5472	684.135	79.1628	684.135	79.5296	684.135	79.8707	684.135	80.5861	684.135	82.8254
684.617	78.5847	684.617	79.2161	684.617	79.5841	684.617	79.9151	684.617	80.629	684.617	82.864
685.099	78.6176	685.099	79.2713	685.099	79.6398	685.099	79.9568	685.099	80.6685	685.099	82.9078
685.581	78.6437	685.581	79.3216	685.581	79.6909	685.581	79.9929	685.581	80.702	685.581	82.9526
686.063	78.663	686.063	79.3614	686.063	79.7319	686.063	80.0215	686.063	80.7291	686.063	82.9929
686.545	78.6773	686.545	79.3876	686.545	79.7604	686.545	80.0416	686.545	80.7511	686.545	83.0237
687.027	78.6893	687.027	79.4003	687.027	79.7764	687.027	80.0537	687.027	80.7706	687.027	83.0412
687.509	78.7015	687.509	79.4025	687.509	79.7829	687.509	80.0593	687.509	80.7899	687.509	83.0439
687.991	78.7157	687.991	79.3995	687.991	79.7839	687.991	80.0604	687.991	80.8106	687.991	83.0331
688.474	78.7326	688.474	79.3967	688.474	79.7832	688.474	80.0598	688.474	80.8327	688.474	83.0121
688.956	78.7525	688.956	79.3991	688.956	79.7832	688.956	80.0605	688.956	80.8547	688.956	82.9858
689.438	78.7759	689.438	79.4093	689.438	79.785	689.438	80.0654	689.438	80.8743	689.438	82.9599
689.92	78.8041	689.92	79.4274	689.92	79.7881	689.92	80.0771	689.92	80.8893	689.92	82.939
690.402	78.839	690.402	79.4519	690.402	79.7923	690.402	80.0973	690.402	80.8983	690.402	82.9266
690.884	78.8821	690.884	79.4802	690.884	79.7976	690.884	80.1263	690.884	80.9019	690.884	82.9248
691.366	78.9339	691.366	79.51	691.366	79.8055	691.366	80.1634	691.366	80.9026	691.366	82.9339
691.848	78.993	691.848	79.5401	691.848	79.8183	691.848	80.2068	691.848	80.9043	691.848	82.9535
692.331	79.0561	692.331	79.5707	692.331	79.8388	692.331	80.2542	692.331	80.9122	692.331	82.9827
692.813	79.1188	692.813	79.6029	692.813	79.8689	692.813	80.3033	692.813	80.9305	692.813	83.0199
693.295	79.1763	693.295	79.6376	693.295	79.9095	693.295	80.352	693.295	80.9614	693.295	83.0633
693.777	79.2252	693.777	79.6751	693.777	79.9592	693.777	80.3988	693.777	81.0048	693.777	83.1104
694.259	79.2632	694.259	79.7142	694.259	80.015	694.259	80.4426	694.259	81.0571	694.259	83.1576
694.741	79.2905	694.741	79.7526	694.741	80.0728	694.741	80.4822	694.741	81.1132	694.741	83.2013
695.223	79.3084	695.223	79.7876	695.223	80.1285	695.223	80.5168	695.223	81.167	695.223	83.2381
695.705	79.3192	695.705	79.8175	695.705	80.1783	695.705	80.5457	695.705	81.2137	695.705	83.2662
696.188	79.3258	696.188	79.8422	696.188	80.2206	696.188	80.5692	696.188	81.2508	696.188	83.2857
696.67	79.3308	696.67	79.8637	696.67	80.2551	696.67	80.5883	696.67	81.2791	696.67	83.2993
697.152	79.3365	697.152	79.8853	697.152	80.283	697.152	80.6049	697.152	81.3014	697.152	83.3111
697.634	79.3449	697.634	79.9104	697.634	80.3063	697.634	80.6216	697.634	81.322	697.634	83.326
698.116	79.3573	698.116	79.941	698.116	80.3269	698.116	80.6403	698.116	81.3446	698.116	83.3476
698.598	79.3744	698.598	79.9772	698.598	80.3457	698.598	80.662	698.598	81.3708	698.598	83.3773
699.08	79.3959	699.08	80.0166	699.08	80.3626	699.08	80.6863	699.08	81.4003	699.08	83.4138
699.562	79.4208	699.562	80.0553	699.562	80.3766	699.562	80.7115	699.562	81.4306	699.562	83.4535
700.045	79.4479	700.045	80.0895	700.045	80.3869	700.045	80.736	700.045	81.4588	700.045	83.4922
700.527	79.4761	700.527	80.1167	700.527	80.3938	700.527	80.7586	700.527	81.4827	700.527	83.5263
701.009	79.505	701.009	80.1367	701.009	80.399	701.009	80.7799	701.009	81.5019	701.009	83.5542
701.491	79.5353	701.491	80.1516	701.491	80.4058	701.491	80.8021	701.491	81.5179	701.491	83.5767
701.973	79.5682	701.973	80.1649	701.973	80.4182	701.973	80.828	701.973	81.5336	701.973	83.5962
702.455	79.6051	702.455	80.1802	702.455	80.4396	702.455	80.8605	702.455	81.5519	702.455	83.6158
702.937	79.6466	702.937	80.2002	702.937	80.4717	702.937	80.9006	702.937	81.5749	702.937	83.6377
703.419	79.6921	703.419	80.2256	703.419	80.5136	703.419	80.9474	703.419	81.6028	703.419	83.6632
703.902	79.7392	703.902	80.2556	703.902	80.5623	703.902	80.9979	703.902	81.6343	703.902	83.6916
704.384	79.7853	704.384	80.2885	704.384	80.6138	704.384	81.0481	704.384	81.6676	704.384	83.7218
704.866	79.8277	704.866	80.3222	704.866	80.6644	704.866	81.0943	704.866	81.7008	704.866	83.7526
705.348	79.8648	705.348	80.3554	705.348	80.7115	705.348	81.1341	705.348	81.7332	705.348	83.783
705.83	79.8966	705.83	80.3874	705.83	80.7549	705.83	81.167	705.83	81.7651	705.83	83.813
706.312	79.9247	706.312	80.4184	706.312	80.7953	706.312	81.1937	706.312	81.7976	706.312	83.8426
706.794	79.951	706.794	80.4485	706.794	80.8344	706.794	81.216	706.794	81.832	706.794	83.8718
707.276	79.9775	707.276	80.4781	707.276	80.8728	707.276	81.2352	707.276	81.8687	707.276	83.9
707.759	80.0047	707.759	80.5068	707.759	80.9098	707.759	81.2525	707.759	81.9073	707.759	83.9263
708.241	80.0321	708.241	80.5344	708.241	80.9439	708.241	81.2685	708.241	81.9466	708.241	83.9495
708.723	80.0584	708.723	80.5602	708.723	80.9729	708.723	81.2837	708.723	81.9845	708.723	83.9694
709.205	80.0818	709.205	80.5843	709.205	80.9956	709.205	81.2989	709.205	82.0193	709.205	83.9866
709.687	80.1013	709.687	80.6067	709.687	81.0123	709.687	81.3149	709.687	82.0497	709.687	84.0025
710.169	80.117	710.169	80.6277	710.169	81.0246	710.169	81.3324	710.169	82.0748	710.169	84.0188
710.651	80.13	710.651	80.648	710.651	81.0352	710.651	81.3514	710.651	82.0948	710.651	84.0368
711.133	80.1421	711.133	80.6683	711.133	81.046	711.133	81.3707	711.133	82.1098	711.133	84.0569
711.615	80.1551	711.615	80.6894	711.615	81.0584	711.615	81.3888	711.615	82.1207	711.615	84.0784
712.098	80.171	712.098	80.7121	712.098	81.0722	712.098	81.4042	712.098	82.129	712.098	84.1
712.58	80.191	712.58	80.7376	712.58	81.0868	712.58	81.4167	712.58	82.1364	712.58	84.1207
713.062	80.216	713.062	80.7667	713.062	81.1016	713.062	81.428	713.062	82.1454	713.062	84.1403
713.544	80.2468	713.544	80.8	713.544	81.1174	713.544	81.4415	713.544	82.1586	713.544	84.1595
714.026	80.283	714.026	80.8373	714.026	81.1358	714.026	81.461	714.026	82.178	714.026	84.1793
714.508	80.324	714.508	80.8773	714.508	81.1595	714.508	81.4899	714.508	82.2045	714.508	84.2007
714.99	80.3681	714.99	80.9178	714.99	81.1902	714.99	81.5291	714.99	82.2376	714.99	84.224
715.472	80.4127	715.472	80.9564	715.472	81.2282	715.472	81.577	715.472	82.2751	715.472	84.2482
715.955	80.4552	715.955	80.9912	715.955	81.2717	715.955	81.63	715.955	82.3142	715.955	84.2716
716.437	80.4937	716.437	81.0215	716.437	81.3174	716.437	81.6834	716.437	82.352	716.437	84.2924
716.919	80.5281	716.919	81.0482	716.919	81.3618	716.919	81.7335	716.919	82.3869	716.919	84.3101
717.401	80.5598	717.401	81.0735	717.401	81.4024	717.401	81.7784	717.401	82.4187	717.401	84.3252
717.883	80.5921	717.883	81.1005	717.883	81.4386	717.883	81.818	717.883	82.4488	717.883	84.3403
718.365	80.6288	718.365	81.132	718.365	81.4721	718.365	81.8538	718.365	82.4794	718.365	84.3584
718.847	80.6725	718.847	81.1693	718.847	81.5056	718.847	81.8875	718.847	82.5125	718.847	84.3826
719.33	80.7238	719.33	81.2125	719.33	81.5414	719.33	81.9199	719.33	82.5488	719.33	84.4149
719.812	80.7802	719.812	81.2596	719.812	81.5807	719.812	81.9508	719.812	82.5876	719.812	84.455
720.294	80.8369	720.294	81.3075	720.294	81.6226	720.294	81.9791	720.294	82.6266	720.294	84.5008
720.776	80.8881	720.776	81.353	720.776	81.6643	720.776	82.0041	720.776	82.6629	720.776	84.5486
721.258	80.9286	721.258	81.3926	721.258	81.7028	721.258	82.0261	721.258	82.6939	721.258	84.5938
721.74	80.956	721.74	81.4245	721.74	81.7356	721.74	82.0466	721.74	82.7183	721.74	84.6323
722.222	80.9711	722.222	81.4479	722.222	81.7616	722.222	82.068	722.222	82.7363	722.222	84.6619
722.704	80.9775	722.704	81.4634	722.704	81.7816	722.704	82.0926	722.704	82.7499	722.704	84.6822
723.187	80.9809	723.187	81.4734	723.187	81.7975	723.187	82.1216	723.187	82.7619	723.187	84.6955
723.669	80.9863	723.669	81.4806	723.669	81.8116	723.669	82.1546	723.669	82.7749	723.669	84.7056
724.151	80.9977	724.151	81.4884	724.151	81.8257	724.151	82.1899	724.151	82.7905	724.151	84.717
724.633	81.0165	724.633	81.4999	724.633	81.8409	724.633	82.225	724.633	82.8092	724.633	84.7334
725.115	81.0418	725.115	81.5173	725.115	81.8571	725.115	82.2579	725.115	82.8298	725.115	84.7569
725.597	81.0712	725.597	81.5417	725.597	81.8738	725.597	82.2876	725.597	82.8502	725.597	84.7868
726.079	81.1023	726.079	81.5728	726.079	81.8909	726.079	82.3143	726.079	82.8689	726.079	84.8206
726.561	81.1333	726.561	81.6095	726.561	81.908	726.561	82.3389	726.561	82.8852	726.561	84.8546
727.043	81.1637	727.043	81.6498	727.043	81.9261	727.043	82.3627	727.043	82.9	727.043	84.8856
727.526	81.194	727.526	81.6919	727.526	81.946	727.526	82.3871	727.526	82.916	727.526	84.9123
728.008	81.2253	728.008	81.7344	728.008	81.9693	728.008	82.4128	728.008	82.9369	728.008	84.936
728.49	81.2584	728.49	81.7764	728.49	81.9974	728.49	82.4405	728.49	82.9663	728.49	84.96
728.972	81.2937	728.972	81.8174	728.972	82.0317	728.972	82.4709	728.972	83.0064	728.972	84.988
729.454	81.3308	729.454	81.8567	729.454	82.0728	729.454	82.5043	729.454	83.0573	729.454	85.0228
729.936	81.3687	729.936	81.8938	729.936	82.1206	729.936	82.5407	729.936	83.1164	729.936	85.0641
730.418	81.4067	730.418	81.9278	730.418	82.1742	730.418	82.5793	730.418	83.1791	730.418	85.1089
730.9	81.4442	730.9	81.9577	730.9	82.2314	730.9	82.6184	730.9	83.2398	730.9	85.1523
731.383	81.481	731.383	81.9836	731.383	82.2896	731.383	82.6554	731.383	83.2931	731.383	85.1891
731.865	81.517	731.865	82.0059	731.865	82.3459	731.865	82.6875	731.865	83.3354	731.865	85.2159
732.347	81.5515	732.347	82.0265	732.347	82.3976	732.347	82.7126	732.347	83.3657	732.347	85.2329
732.829	81.5835	732.829	82.0477	732.829	82.4438	732.829	82.7301	732.829	83.3851	732.829	85.2434
733.311	81.6115	733.311	82.0718	733.311	82.4844	733.311	82.7408	733.311	83.3969	733.311	85.2527
733.793	81.6342	733.793	82.1003	733.793	82.5206	733.793	82.7474	733.793	83.4054	733.793	85.266
734.275	81.6513	734.275	82.1332	734.275	82.5543	734.275	82.7534	734.275	83.4152	734.275	85.2867
734.758	81.6638	734.758	82.1694	734.758	82.5875	734.758	82.7622	734.758	83.4302	734.758	85.3152
735.24	81.6743	735.24	82.2071	735.24	82.6216	735.24	82.7769	735.24	83.4531	735.24	85.3492
735.722	81.6864	735.722	82.2442	735.722	82.6573	735.722	82.7996	735.722	83.4852	735.722	85.3854
736.204	81.7035	736.204	82.2792	736.204	82.6943	736.204	82.8311	736.204	83.5259	736.204	85.4202
736.686	81.7283	736.686	82.3115	736.686	82.7322	736.686	82.8714	736.686	83.5731	736.686	85.4518
737.168	81.761	737.168	82.3417	737.168	82.7701	737.168	82.9191	737.168	83.6228	737.168	85.4795
737.65	81.8003	737.65	82.3707	737.65	82.8071	737.65	82.9716	737.65	83.6707	737.65	85.5045
738.132	81.8431	738.132	82.3998	738.132	82.8423	738.132	83.0254	738.132	83.7125	738.132	85.5279
738.615	81.8862	738.615	82.4301	738.615	82.8747	738.615	83.0763	738.615	83.7455	738.615	85.5509
739.097	81.9276	739.097	82.4621	739.097	82.9033	739.097	83.1207	739.097	83.7695	739.097	85.5743
739.579	81.9668	739.579	82.4962	739.579	82.9277	739.579	83.1566	739.579	83.7872	739.579	85.5987
740.061	82.0049	740.061	82.5319	740.061	82.948	740.061	83.1844	740.061	83.8035	740.061	85.6249
740.543	82.0438	740.543	82.5688	740.543	82.9651	740.543	83.2067	740.543	83.8241	740.543	85.6535
741.025	82.085	741.025	82.606	741.025	82.9809	741.025	83.2276	741.025	83.8535	741.025	85.6855
741.507	82.1289	741.507	82.6426	741.507	82.9976	741.507	83.2519	741.507	83.894	741.507	85.721
741.989	82.1743	741.989	82.6783	741.989	83.0169	741.989	83.2823	741.989	83.9443	741.989	85.7593
742.471	82.2192	742.471	82.7132	742.471	83.0406	742.471	83.3199	742.471	84.0009	742.471	85.7993
742.954	82.2618	742.954	82.7484	742.954	83.0687	742.954	83.3634	742.954	84.0589	742.954	85.8395
743.436	82.3013	743.436	82.7856	743.436	83.1011	743.436	83.4103	743.436	84.1141	743.436	85.8791
743.918	82.3388	743.918	82.8266	743.918	83.1374	743.918	83.4582	743.918	84.1644	743.918	85.9187
744.4	82.3766	744.4	82.873	744.4	83.1775	744.4	83.5061	744.4	84.2097	744.4	85.9595
744.882	82.4172	744.882	82.9246	744.882	83.2217	744.882	83.5544	744.882	84.2521	744.882	86.003
745.364	82.4625	745.364	82.98	745.364	83.2704	745.364	83.6042	745.364	84.2939	745.364	86.0497
745.846	82.512	745.846	83.0356	745.846	83.3237	745.846	83.656	745.846	84.3365	745.846	86.0986
746.328	82.5639	746.328	83.0877	746.328	83.3804	746.328	83.7088	746.328	84.3799	746.328	86.1472
746.811	82.615	746.811	83.1328	746.811	83.4386	746.811	83.7597	746.811	84.4222	746.811	86.1924
747.293	82.6622	747.293	83.1687	747.293	83.495	747.293	83.8049	747.293	84.4608	747.293	86.2318
747.775	82.7034	747.775	83.1954	747.775	83.5465	747.775	83.8412	747.775	84.4936	747.775	86.2651
748.257	82.7383	748.257	83.2148	748.257	83.591	748.257	83.8674	748.257	84.5195	748.257	86.2942
748.739	82.7685	748.739	83.2296	748.739	83.6272	748.739	83.885	748.739	84.5388	748.739	86.3222
749.221	82.7962	749.221	83.2426	749.221	83.6561	749.221	83.8979	749.221	84.5532	749.221	86.3525
749.703	82.8235	749.703	83.2558	749.703	83.6794	749.703	83.9107	749.703	84.5648	749.703	86.3862
750.186	82.852	750.186	83.2702	750.186	83.6995	750.186	83.9268	750.186	84.5761	750.186	86.4229
750.668	82.8824	750.668	83.2863	750.668	83.7184	750.668	83.9481	750.668	84.5892	750.668	86.46
751.15	82.9147	751.15	83.3045	751.15	83.7378	751.15	83.9738	751.15	84.6058	751.15	86.4944
751.632	82.9485	751.632	83.3256	751.632	83.7588	751.632	84.0021	751.632	84.6272	751.632	86.524
752.114	82.9836	752.114	83.3511	752.114	83.7826	752.114	84.0312	752.114	84.654	752.114	86.5488
752.596	83.0197	752.596	83.3825	752.596	83.8098	752.596	84.0602	752.596	84.6858	752.596	86.5701
753.078	83.0562	753.078	83.4212	753.078	83.8415	753.078	84.0895	753.078	84.7209	753.078	86.5901
753.56	83.0925	753.56	83.4668	753.56	83.8779	753.56	84.1201	753.56	84.7567	753.56	86.6102
754.043	83.1275	754.043	83.518	754.043	83.9187	754.043	84.1528	754.043	84.7899	754.043	86.6303
754.525	83.1604	754.525	83.5718	754.525	83.9622	754.525	84.187	754.525	84.8179	754.525	86.6485
755.007	83.1909	755.007	83.6249	755.007	84.0066	755.007	84.2211	755.007	84.8397	755.007	86.6629
755.489	83.22	755.489	83.6742	755.489	84.0498	755.489	84.2532	755.489	84.8568	755.489	86.6723
755.971	83.2495	755.971	83.7176	755.971	84.0905	755.971	84.2819	755.971	84.8728	755.971	86.6779
756.453	83.2818	756.453	83.7545	756.453	84.1286	756.453	84.3073	756.453	84.8927	756.453	86.6831
756.935	83.3185	756.935	83.7855	756.935	84.165	756.935	84.3314	756.935	84.9209	756.935	86.6926
757.417	83.3605	757.417	83.8126	757.417	84.201	757.417	84.3567	757.417	84.9599	757.417	86.7108
757.899	83.4071	757.899	83.838	757.899	84.238	757.899	84.3857	757.899	85.0092	757.899	86.7402
758.382	83.4564	758.382	83.8645	758.382	84.2761	758.382	84.4195	758.382	85.0659	758.382	86.7808
758.864	83.5064	758.864	83.894	758.864	84.3148	758.864	84.4572	758.864	85.1249	758.864	86.8302
759.346	83.5553	759.346	83.9282	759.346	84.3528	759.346	84.4972	759.346	85.1817	759.346	86.8848
759.828	83.6029	759.828	83.9676	759.828	84.3892	759.828	84.5374	759.828	85.2327	759.828	86.9406
760.31	83.6498	760.31	84.0119	760.31	84.4236	760.31	84.5767	760.31	85.2771	760.31	86.9947
760.792	83.6973	760.792	84.0599	760.792	84.4568	760.792	84.6157	760.792	85.3158	760.792	87.0453
761.274	83.7464	761.274	84.1101	761.274	84.4898	761.274	84.6558	761.274	85.3515	761.274	87.0911
761.756	83.7969	761.756	84.1612	761.756	84.5237	761.756	84.6989	761.756	85.3867	761.756	87.1317
762.239	83.8475	762.239	84.2124	762.239	84.5587	762.239	84.7459	762.239	85.4237	762.239	87.1666
762.721	83.8963	762.721	84.2639	762.721	84.5946	762.721	84.7962	762.721	85.4632	762.721	87.1959
763.203	83.9411	763.203	84.3163	763.203	84.6304	763.203	84.8479	763.203	85.5052	763.203	87.2206
763.685	83.9802	763.685	84.3704	763.685	84.6649	763.685	84.8987	763.685	85.5488	763.685	87.2425
764.167	84.0135	764.167	84.4263	764.167	84.6979	764.167	84.9466	764.167	85.593	764.167	87.2643
764.649	84.0416	764.649	84.4831	764.649	84.7292	764.649	84.9908	764.649	85.6365	764.649	87.2888
765.131	84.0661	765.131	84.5384	765.131	84.7592	765.131	85.032	765.131	85.6785	765.131	87.3174
765.614	84.0885	765.614	84.5893	765.614	84.7882	765.614	85.0714	765.614	85.7176	765.614	87.3498
766.096	84.11	766.096	84.6328	766.096	84.8155	766.096	85.1105	766.096	85.7529	766.096	87.3838
766.578	84.1315	766.578	84.6672	766.578	84.8404	766.578	85.1497	766.578	85.7835	766.578	87.4156
767.06	84.1538	767.06	84.6923	767.06	84.862	767.06	85.189	767.06	85.809	767.06	87.4417
767.542	84.1776	767.542	84.71	767.542	84.8807	767.542	85.2272	767.542	85.8298	767.542	87.4601
768.024	84.2043	768.024	84.7231	768.024	84.8981	768.024	85.2633	768.024	85.847	768.024	87.4706
768.506	84.2354	768.506	84.7354	768.506	84.9173	768.506	85.2972	768.506	85.862	768.506	87.4757
768.988	84.2722	768.988	84.75	768.988	84.9421	768.988	85.3294	768.988	85.8767	768.988	87.4788
769.471	84.3153	769.471	84.7691	769.471	84.9754	769.471	85.361	769.471	85.8923	769.471	87.4836
769.953	84.3641	769.953	84.7938	769.953	85.0182	769.953	85.3932	769.953	85.9097	769.953	87.4928
770.435	84.417	770.435	84.824	770.435	85.0684	770.435	85.4267	770.435	85.9291	770.435	87.5076
770.917	84.4716	770.917	84.8591	770.917	85.122	770.917	85.4614	770.917	85.9506	770.917	87.5279
771.399	84.5252	771.399	84.8981	771.399	85.1738	771.399	85.4967	771.399	85.9747	771.399	87.553
771.881	84.5759	771.881	84.9399	771.881	85.2196	771.881	85.5315	771.881	86.0019	771.881	87.5825
772.363	84.6228	772.363	84.9834	772.363	85.2574	772.363	85.5656	772.363	86.0336	772.363	87.6166
772.845	84.6662	772.845	85.0277	772.845	85.2886	772.845	85.5997	772.845	86.0713	772.845	87.6558
773.327	84.7069	773.327	85.0716	773.327	85.3167	773.327	85.6349	773.327	86.1161	773.327	87.7006
773.81	84.746	773.81	85.1144	773.81	85.3463	773.81	85.6731	773.81	86.1683	773.81	87.7507
774.292	84.7843	774.292	85.1556	774.292	85.3811	774.292	85.7153	774.292	86.2265	774.292	87.8047
774.774	84.8217	774.774	85.195	774.774	85.4226	774.774	85.7616	774.774	86.2884	774.774	87.86
775.256	84.8571	775.256	85.233	775.256	85.4694	775.256	85.8104	775.256	86.3503	775.256	87.9134
775.738	84.8893	775.738	85.2698	775.738	85.5182	775.738	85.8591	775.738	86.4084	775.738	87.962
776.22	84.9172	776.22	85.3059	776.22	85.5651	776.22	85.9044	776.22	86.4592	776.22	88.0036
776.702	84.9402	776.702	85.3412	776.702	85.607	776.702	85.9435	776.702	86.5009	776.702	88.0376
777.184	84.9594	777.184	85.3758	777.184	85.6434	777.184	85.9751	777.184	86.5335	777.184	88.065
777.667	84.9771	777.667	85.41	777.667	85.6759	777.667	85.9995	777.667	86.5595	777.667	88.0882
778.149	84.9968	778.149	85.4442	778.149	85.708	778.149	86.0193	778.149	86.5828	778.149	88.1104
778.631	85.0223	778.631	85.4793	778.631	85.7436	778.631	86.0385	778.631	86.6083	778.631	88.1348
779.113	85.057	779.113	85.5164	779.113	85.7861	779.113	86.0616	779.113	86.6407	779.113	88.1642
779.595	85.1029	779.595	85.5565	779.595	85.8368	779.595	86.0928	779.595	86.6829	779.595	88.2
780.077	85.1598	780.077	85.6001	780.077	85.8949	780.077	86.1345	780.077	86.7354	780.077	88.2422
780.559	85.2254	780.559	85.6464	780.559	85.9577	780.559	86.1869	780.559	86.7962	780.559	88.289
781.041	85.2956	781.041	85.6939	781.041	86.0212	781.041	86.2478	781.041	86.861	781.041	88.3374
781.524	85.3651	781.524	85.7404	781.524	86.0812	781.524	86.313	781.524	86.9246	781.524	88.3842
782.006	85.4287	782.006	85.7835	782.006	86.1342	782.006	86.3774	782.006	86.9819	782.006	88.4265
782.488	85.4826	782.488	85.8216	782.488	86.1779	782.488	86.4363	782.488	87.0297	782.488	88.4629
782.97	85.5246	782.97	85.8541	782.97	86.212	782.97	86.4864	782.97	87.0667	782.97	88.494
783.452	85.555	783.452	85.8818	783.452	86.2375	783.452	86.5268	783.452	87.0942	783.452	88.5217
783.934	85.5761	783.934	85.9064	783.934	86.2571	783.934	86.5586	783.934	87.1151	783.934	88.5492
784.416	85.5915	784.416	85.9306	784.416	86.2745	784.416	86.5848	784.416	87.1333	784.416	88.5794
784.898	85.6052	784.898	85.957	784.898	86.2935	784.898	86.6092	784.898	87.1522	784.898	88.6141
785.381	85.6209	785.381	85.9882	785.381	86.3175	785.381	86.6351	785.381	87.1746	785.381	88.6535
785.863	85.6414	785.863	86.0257	785.863	86.3489	785.863	86.6651	785.863	87.2017	785.863	88.6961
786.345	85.6682	786.345	86.0701	786.345	86.3882	786.345	86.7002	786.345	87.234	786.345	88.7399
786.827	85.7015	786.827	86.121	786.827	86.4346	786.827	86.7401	786.827	87.2706	786.827	88.7825
787.309	85.7405	787.309	86.1764	787.309	86.4857	787.309	86.7838	787.309	87.3107	787.309	88.8227
787.791	85.7841	787.791	86.2337	787.791	86.5387	787.791	86.83	787.791	87.353	787.791	88.8604
788.273	85.8306	788.273	86.2899	788.273	86.5908	788.273	86.8774	788.273	87.3966	788.273	88.8969
788.755	85.8787	788.755	86.3423	788.755	86.6401	788.755	86.9252	788.755	87.4408	788.755	88.9342
789.237	85.9276	789.237	86.3893	789.237	86.6857	789.237	86.9731	789.237	87.4855	789.237	88.974
789.72	85.9767	789.72	86.4309	789.72	86.728	789.72	87.021	789.72	87.5308	789.72	89.0175
790.202	86.0257	790.202	86.4688	790.202	86.7677	790.202	87.0693	790.202	87.5772	790.202	89.065
790.684	86.0744	790.684	86.5058	790.684	86.8062	790.684	87.1187	790.684	87.625	790.684	89.1152
791.166	86.1229	791.166	86.5448	791.166	86.8445	791.166	87.1695	791.166	87.674	791.166	89.1661
791.648	86.1704	791.648	86.5883	791.648	86.8832	791.648	87.222	791.648	87.7235	791.648	89.2153
792.13	86.2165	792.13	86.6371	792.13	86.9222	792.13	87.2756	792.13	87.7717	792.13	89.26
792.612	86.2605	792.612	86.6901	792.612	86.9612	792.612	87.3291	792.612	87.8167	792.612	89.2979
793.095	86.302	793.095	86.7451	793.095	86.9995	793.095	87.3804	793.095	87.8564	793.095	89.3274
793.577	86.3411	793.577	86.7989	793.577	87.0365	793.577	87.427	793.577	87.8898	793.577	89.3481
794.059	86.3784	794.059	86.8487	794.059	87.0717	794.059	87.4667	794.059	87.9171	794.059	89.361
794.541	86.4151	794.541	86.8927	794.541	87.1049	794.541	87.4981	794.541	87.9402	794.541	89.3685
795.023	86.4523	795.023	86.9305	795.023	87.1363	795.023	87.5218	795.023	87.9615	795.023	89.3742
795.505	86.4909	795.505	86.9631	795.505	87.1665	795.505	87.5398	795.505	87.9838	795.505	89.3819
795.987	86.5313	795.987	86.9925	795.987	87.1963	795.987	87.5558	795.987	88.0093	795.987	89.3951
796.469	86.573	796.469	87.021	796.469	87.2269	796.469	87.5739	796.469	88.0385	796.469	89.4164
796.952	86.6151	796.952	87.0511	796.952	87.2595	796.952	87.5983	796.952	88.0712	796.952	89.4466
797.434	86.6567	797.434	87.0842	797.434	87.2954	797.434	87.6314	797.434	88.106	797.434	89.4848
797.916	86.6967	797.916	87.1215	797.916	87.3353	797.916	87.6741	797.916	88.1419	797.916	89.5291
798.398	86.7349	798.398	87.1626	798.398	87.3796	798.398	87.7252	798.398	88.1784	798.398	89.5766
798.88	86.7713	798.88	87.2064	798.88	87.4276	798.88	87.7819	798.88	88.2158	798.88	89.6248
799.362	86.8066	799.362	87.2506	799.362	87.4781	799.362	87.8403	799.362	88.2552	799.362	89.6714
799.844	86.8414	799.844	87.2926	799.844	87.5292	799.844	87.8961	799.844	88.2976	799.844	89.7148
800.326	86.876	800.326	87.3301	800.326	87.5789	800.326	87.9457	800.326	88.3432	800.326	89.754
800.808	86.9106	800.808	87.3615	800.808	87.6253	800.808	87.9863	800.808	88.3911	800.808	89.7882
801.291	86.9449	801.291	87.3867	801.291	87.6671	801.291	88.0163	801.291	88.4396	801.291	89.8167
801.773	86.9784	801.773	87.4072	801.773	87.7039	801.773	88.0359	801.773	88.4862	801.773	89.8391
802.255	87.0106	802.255	87.4254	802.255	87.7358	802.255	88.0466	802.255	88.5289	802.255	89.8547
802.737	87.0411	802.737	87.4442	802.737	87.7638	802.737	88.0515	802.737	88.5662	802.737	89.8633
803.219	87.0698	803.219	87.4658	803.219	87.7889	803.219	88.0542	803.219	88.5976	803.219	89.865
803.701	87.0969	803.701	87.4912	803.701	87.8122	803.701	88.0583	803.701	88.6233	803.701	89.8607
804.183	87.1229	804.183	87.5201	804.183	87.8349	804.183	88.067	804.183	88.6442	804.183	89.8517
804.665	87.1488	804.665	87.5513	804.665	87.8575	804.665	88.0823	804.665	88.6614	804.665	89.8401
805.148	87.176	805.148	87.5834	805.148	87.8805	805.148	88.1045	805.148	88.6758	805.148	89.8283
805.63	87.2063	805.63	87.6156	805.63	87.904	805.63	88.133	805.63	88.6886	805.63	89.8185
806.112	87.2413	806.112	87.6478	806.112	87.928	806.112	88.166	806.112	88.7009	806.112	89.813
806.594	87.2824	806.594	87.6808	806.594	87.9523	806.594	88.2017	806.594	88.7139	806.594	89.8127
807.076	87.3296	807.076	87.7151	807.076	87.9765	807.076	88.238	807.076	88.7285	807.076	89.8177
807.558	87.382	807.558	87.7511	807.558	88.0002	807.558	88.2734	807.558	88.7453	807.558	89.8267
808.04	87.437	808.04	87.788	808.04	88.0227	808.04	88.3066	808.04	88.7643	808.04	89.8372
808.523	87.4913	808.523	87.8245	808.523	88.0435	808.523	88.3368	808.523	88.785	808.523	89.8466
809.005	87.5414	809.005	87.8588	809.005	88.0624	809.005	88.3637	809.005	88.8065	809.005	89.8526
809.487	87.5845	809.487	87.89	809.487	88.08	809.487	88.3874	809.487	88.828	809.487	89.8541
809.969	87.619	809.969	87.9179	809.969	88.0974	809.969	88.4087	809.969	88.8488	809.969	89.8517
810.451	87.6453	810.451	87.9439	810.451	88.1161	810.451	88.429	810.451	88.8692	810.451	89.8477
810.933	87.6653	810.933	87.9701	810.933	88.1381	810.933	88.4501	810.933	88.8895	810.933	89.8452
811.415	87.6816	811.415	87.9984	811.415	88.165	811.415	88.4735	811.415	88.9105	811.415	89.8473
811.897	87.6974	811.897	88.0306	811.897	88.1976	811.897	88.5002	811.897	88.9323	811.897	89.8567
812.38	87.7154	812.38	88.0671	812.38	88.2362	812.38	88.5299	812.38	88.9551	812.38	89.8745
812.862	87.7374	812.862	88.1075	812.862	88.28	812.862	88.5615	812.862	88.9783	812.862	89.9007
813.344	87.7647	813.344	88.1503	813.344	88.3276	813.344	88.5936	813.344	89.002	813.344	89.9343
813.826	87.7975	813.826	88.1941	813.826	88.3775	813.826	88.625	813.826	89.0266	813.826	89.974
814.308	87.8359	814.308	88.2375	814.308	88.4282	814.308	88.6556	814.308	89.0534	814.308	90.019
814.79	87.8796	814.79	88.2798	814.79	88.4788	814.79	88.687	814.79	89.0844	814.79	90.0686
815.272	87.928	815.272	88.3208	815.272	88.5287	815.272	88.722	815.272	89.1219	815.272	90.1228
815.754	87.9801	815.754	88.3607	815.754	88.5776	815.754	88.7634	815.754	89.1678	815.754	90.1815
816.236	88.0348	816.236	88.4005	816.236	88.6255	816.236	88.8139	816.236	89.2233	816.236	90.2448
816.719	88.0905	816.719	88.441	816.719	88.6726	816.719	88.8739	816.719	89.2881	816.719	90.3121
817.201	88.1456	817.201	88.4834	817.201	88.7191	817.201	88.9421	817.201	89.361	817.201	90.3832
817.683	88.1986	817.683	88.5285	817.683	88.7659	817.683	89.0158	817.683	89.44	817.683	90.4577
818.165	88.2483	818.165	88.5769	818.165	88.8138	818.165	89.0911	818.165	89.523	818.165	90.5352
818.647	88.294	818.647	88.6284	818.647	88.864	818.647	89.1648	818.647	89.6075	818.647	90.6155
819.129	88.3354	819.129	88.6822	819.129	88.9174	819.129	89.2345	819.129	89.6916	819.129	90.6983
819.611	88.3726	819.611	88.7365	819.611	88.9743	819.611	89.2992	819.611	89.7734	819.611	90.7826
820.093	88.406	820.093	88.7895	820.093	89.0342	820.093	89.3592	820.093	89.8509	820.093	90.8668
820.576	88.4363	820.576	88.8397	820.576	89.0954	820.576	89.415	820.576	89.9224	820.576	90.9485
821.058	88.4647	821.058	88.8864	821.058	89.1555	821.058	89.4674	821.058	89.9865	821.058	91.0256
821.54	88.4929	821.54	88.9298	821.54	89.2124	821.54	89.5169	821.54	90.0426	821.54	91.0958
822.022	88.5226	822.022	88.9711	822.022	89.2643	822.022	89.5639	822.022	90.0907	822.022	91.1583
822.504	88.5559	822.504	89.0117	822.504	89.3107	822.504	89.6093	822.504	90.1317	822.504	91.2133
822.986	88.5939	822.986	89.0526	822.986	89.3524	822.986	89.6537	822.986	90.1673	822.986	91.2619
823.468	88.6371	823.468	89.094	823.468	89.3909	823.468	89.6984	823.468	90.1992	823.468	91.3063
823.951	88.6844	823.951	89.1352	823.951	89.428	823.951	89.744	823.951	90.2288	823.951	91.3484
824.433	88.7335	824.433	89.1748	824.433	89.4651	824.433	89.7904	824.433	90.2569	824.433	91.3895
824.915	88.7817	824.915	89.2116	824.915	89.5023	824.915	89.8363	824.915	90.2838	824.915	91.4301
825.397	88.826	825.397	89.2451	825.397	89.5393	825.397	89.8795	825.397	90.3089	825.397	91.4699
825.879	88.865	825.879	89.2758	825.879	89.575	825.879	89.918	825.879	90.3323	825.879	91.508
826.361	88.8985	826.361	89.3051	826.361	89.6088	826.361	89.9502	826.361	90.3538	826.361	91.5432
826.843	88.9283	826.843	89.3346	826.843	89.6407	826.843	89.9765	826.843	90.3741	826.843	91.5746
827.325	88.9568	827.325	89.3653	827.325	89.6714	827.325	89.9985	827.325	90.394	827.325	91.6017
827.808	88.9869	827.808	89.3974	827.808	89.7018	827.808	90.0195	827.808	90.4146	827.808	91.6246
828.29	89.0203	828.29	89.4299	828.29	89.7329	828.29	90.0422	828.29	90.4369	828.29	91.6436
828.772	89.0572	828.772	89.4612	828.772	89.7647	828.772	90.0688	828.772	90.462	828.772	91.6596
829.254	89.0965	829.254	89.4899	829.254	89.7963	829.254	90.0993	829.254	90.4905	829.254	91.6737
829.736	89.136	829.736	89.5156	829.736	89.8262	829.736	90.1325	829.736	90.5229	829.736	91.6872
830.218	89.1739	830.218	89.5392	830.218	89.853	830.218	90.1659	830.218	90.5597	830.218	91.7018
830.7	89.2092	830.7	89.5631	830.7	89.8763	830.7	90.1979	830.7	90.6014	830.7	91.7193
831.182	89.2426	831.182	89.5899	831.182	89.897	831.182	90.228	831.182	90.6479	831.182	91.7415
831.664	89.2758	831.664	89.6225	831.664	89.9177	831.664	90.2575	831.664	90.6988	831.664	91.7698
832.147	89.3109	832.147	89.6622	832.147	89.9414	832.147	90.2886	832.147	90.7528	832.147	91.8049
832.629	89.3491	832.629	89.7089	832.629	89.9708	832.629	90.3239	832.629	90.8083	832.629	91.8463
833.111	89.3905	833.111	89.761	833.111	90.0073	833.111	90.3648	833.111	90.863	833.111	91.8923
833.593	89.4332	833.593	89.8158	833.593	90.0504	833.593	90.4106	833.593	90.9148	833.593	91.9401
834.075	89.4749	834.075	89.8704	834.075	90.098	834.075	90.4594	834.075	90.9621	834.075	91.9861
834.557	89.5129	834.557	89.9223	834.557	90.147	834.557	90.5079	834.557	91.0038	834.557	92.0271
835.039	89.5463	835.039	89.9701	835.039	90.1947	835.039	90.5534	835.039	91.0399	835.039	92.0608
835.521	89.5754	835.521	90.0135	835.521	90.2396	835.521	90.5942	835.521	91.0714	835.521	92.0867
836.004	89.6026	836.004	90.0532	836.004	90.2814	836.004	90.6306	836.004	91.0998	836.004	92.1061
836.486	89.6305	836.486	90.0901	836.486	90.321	836.486	90.6641	836.486	91.127	836.486	92.122
836.968	89.6614	836.968	90.1254	836.968	90.3597	836.968	90.6968	836.968	91.1548	836.968	92.1379
837.45	89.6958	837.45	90.1594	837.45	90.398	837.45	90.7306	837.45	91.1843	837.45	92.1569
837.932	89.7324	837.932	90.1923	837.932	90.4354	837.932	90.7665	837.932	91.2161	837.932	92.181
838.414	89.7686	838.414	90.2236	838.414	90.4704	838.414	90.8043	838.414	91.2499	838.414	92.2095
838.896	89.8017	838.896	90.253	838.896	90.5014	838.896	90.8435	838.896	91.2845	838.896	92.2404
839.379	89.8306	839.379	90.2808	839.379	90.5274	839.379	90.8836	839.379	91.3189	839.379	92.2707
839.861	89.8562	839.861	90.3073	839.861	90.5495	839.861	90.9246	839.861	91.3519	839.861	92.2979
840.343	89.8814	840.343	90.3338	840.343	90.5701	840.343	90.9668	840.343	91.3832	840.343	92.3211
840.825	89.9104	840.825	90.3619	840.825	90.5934	840.825	91.0108	840.825	91.4135	840.825	92.3415
841.307	89.9469	841.307	90.3928	841.307	90.6234	841.307	91.0562	841.307	91.4441	841.307	92.3619
841.789	89.9925	841.789	90.4275	841.789	90.6633	841.789	91.1021	841.789	91.4771	841.789	92.3861
842.271	90.0462	842.271	90.4662	842.271	90.7138	842.271	91.1464	842.271	91.514	842.271	92.4171
842.753	90.1044	842.753	90.508	842.753	90.7736	842.753	91.1867	842.753	91.5554	842.753	92.4558
843.236	90.162	843.236	90.5519	843.236	90.839	843.236	91.221	843.236	91.6006	843.236	92.501
843.718	90.214	843.718	90.5964	843.718	90.9056	843.718	91.2485	843.718	91.6478	843.718	92.5495
844.2	90.2571	844.2	90.6403	844.2	90.9693	844.2	91.2699	844.2	91.6945	844.2	92.5972
844.682	90.2901	844.682	90.6825	844.682	91.0271	844.682	91.2876	844.682	91.7385	844.682	92.6406
845.164	90.3146	845.164	90.7226	845.164	91.0779	845.164	91.3048	845.164	91.7785	845.164	92.6777
845.646	90.3337	845.646	90.7603	845.646	91.1221	845.646	91.3247	845.646	91.8149	845.646	92.7085
846.128	90.3516	846.128	90.796	846.128	91.1609	846.128	91.3502	846.128	91.8491	846.128	92.7348
846.61	90.3719	846.61	90.8298	846.61	91.1956	846.61	91.3826	846.61	91.8833	846.61	92.7592
847.092	90.3972	847.092	90.8624	847.092	91.2274	847.092	91.4223	847.092	91.9197	847.092	92.7842
847.575	90.4286	847.575	90.8943	847.575	91.2565	847.575	91.4686	847.575	91.9594	847.575	92.8115
848.057	90.4662	848.057	90.9263	848.057	91.2829	848.057	91.5197	848.057	92.0024	848.057	92.8417
848.539	90.5087	848.539	90.959	848.539	91.3066	848.539	91.5737	848.539	92.0475	848.539	92.8738
849.021	90.5545	849.021	90.9932	849.021	91.3281	849.021	91.6285	849.021	92.0928	849.021	92.9067
849.503	90.6021	849.503	91.0293	849.503	91.3486	849.503	91.6822	849.503	92.1365	849.503	92.9389
849.985	90.65	849.985	91.0677	849.985	91.3695	849.985	91.7332	849.985	92.1773	849.985	92.9694
850.467	90.6973	850.467	91.1085	850.467	91.3929	850.467	91.7806	850.467	92.2148	850.467	92.998
850.949	90.7437	850.949	91.1518	850.949	91.42	850.949	91.824	850.949	92.2495	850.949	93.0255
851.432	90.7894	851.432	91.1974	851.432	91.4517	851.432	91.8638	851.432	92.2824	851.432	93.053
851.914	90.835	851.914	91.245	851.914	91.4881	851.914	91.9008	851.914	92.3146	851.914	93.0821
852.396	90.8811	852.396	91.2942	852.396	91.5283	852.396	91.9364	852.396	92.3469	852.396	93.114
852.878	90.928	852.878	91.3437	852.878	91.5713	852.878	91.9718	852.878	92.3799	852.878	93.1495
853.36	90.9753	853.36	91.3919	853.36	91.6157	853.36	92.0076	853.36	92.4134	853.36	93.1878
853.842	91.022	853.842	91.4366	853.842	91.6602	853.842	92.0441	853.842	92.447	853.842	93.2272
854.324	91.0668	854.324	91.4759	854.324	91.7041	854.324	92.0808	854.324	92.4801	854.324	93.2651
854.807	91.1084	854.807	91.5081	854.807	91.7467	854.807	92.1166	854.807	92.5121	854.807	93.2982
855.289	91.1458	855.289	91.5329	855.289	91.788	855.289	92.1506	855.289	92.5423	855.289	93.3239
855.771	91.1791	855.771	91.5513	855.771	91.8279	855.771	92.1818	855.771	92.5705	855.771	93.3408
856.253	91.2091	856.253	91.5658	856.253	91.8669	856.253	92.2102	856.253	92.5968	856.253	93.3492
856.735	91.2371	856.735	91.58	856.735	91.905	856.735	92.2359	856.735	92.6214	856.735	93.351
857.217	91.2649	857.217	91.5977	857.217	91.9427	857.217	92.26	857.217	92.6446	857.217	93.3493
857.699	91.2939	857.699	91.622	857.699	91.9802	857.699	92.284	857.699	92.6671	857.699	93.3478
858.181	91.3253	858.181	91.655	858.181	92.0172	858.181	92.3092	858.181	92.6894	858.181	93.3494
858.663	91.3597	858.663	91.697	858.663	92.0537	858.663	92.3368	858.663	92.7122	858.663	93.3562
859.146	91.3974	859.146	91.7469	859.146	92.0892	859.146	92.3677	859.146	92.7362	859.146	93.3688
859.628	91.4385	859.628	91.8023	859.628	92.1235	859.628	92.4021	859.628	92.762	859.628	93.3868
860.11	91.4828	860.11	91.8605	860.11	92.1566	860.11	92.4397	860.11	92.7902	860.11	93.4094
860.592	91.5302	860.592	91.9187	860.592	92.1887	860.592	92.4798	860.592	92.8212	860.592	93.4356
861.074	91.58	861.074	91.9745	861.074	92.2209	861.074	92.5215	861.074	92.8553	861.074	93.4652
861.556	91.6311	861.556	92.0266	861.556	92.2538	861.556	92.5636	861.556	92.8924	861.556	93.4979
862.038	91.6818	862.038	92.0741	862.038	92.2885	862.038	92.6047	862.038	92.9317	862.038	93.5335
862.52	91.7302	862.52	92.1173	862.52	92.3252	862.52	92.6438	862.52	92.9724	862.52	93.5716
863.003	91.7743	863.003	92.1566	863.003	92.3637	863.003	92.6801	863.003	93.0131	863.003	93.6111
863.485	91.813	863.485	92.193	863.485	92.4029	863.485	92.7132	863.485	93.0524	863.485	93.6504
863.967	91.8458	863.967	92.2272	863.967	92.4414	863.967	92.7434	863.967	93.0896	863.967	93.6876
864.449	91.8737	864.449	92.2599	864.449	92.4781	864.449	92.7714	864.449	93.1243	864.449	93.721
864.931	91.8984	864.931	92.2915	864.931	92.5122	864.931	92.7985	864.931	93.1568	864.931	93.7495
865.413	91.9222	865.413	92.3221	865.413	92.5439	865.413	92.8262	865.413	93.1879	865.413	93.7731
865.895	91.9474	865.895	92.3518	865.895	92.5741	865.895	92.8557	865.895	93.2185	865.895	93.7927
866.377	91.9753	866.377	92.3807	866.377	92.6042	866.377	92.8879	866.377	93.2493	866.377	93.8102
866.86	92.0063	866.86	92.409	866.86	92.6353	866.86	92.923	866.86	93.2802	866.86	93.8275
867.342	92.04	867.342	92.4369	867.342	92.668	867.342	92.9604	867.342	93.3106	867.342	93.8466
867.824	92.0751	867.824	92.4649	867.824	92.7023	867.824	92.9991	867.824	93.3397	867.824	93.8687
868.306	92.1101	868.306	92.4935	868.306	92.7376	868.306	93.0377	868.306	93.3664	868.306	93.8945
868.788	92.1438	868.788	92.523	868.788	92.7728	868.788	93.075	868.788	93.3905	868.788	93.9236
869.27	92.1755	869.27	92.5531	869.27	92.8073	869.27	93.1102	869.27	93.4124	869.27	93.9556
869.752	92.2054	869.752	92.5841	869.752	92.8411	869.752	93.1433	869.752	93.4335	869.752	93.9894
870.234	92.2344	870.234	92.6157	870.234	92.8747	870.234	93.1749	870.234	93.4557	870.234	94.0245
870.717	92.2636	870.717	92.6481	870.717	92.909	870.717	93.2059	870.717	93.4812	870.717	94.0606
871.199	92.2943	871.199	92.6817	871.199	92.9451	871.199	93.2377	871.199	93.5115	871.199	94.0978
871.681	92.3278	871.681	92.7172	871.681	92.9833	871.681	93.2714	871.681	93.5473	871.681	94.1365
872.163	92.3645	872.163	92.7549	872.163	93.0232	872.163	93.3075	872.163	93.5883	872.163	94.1771
872.645	92.4044	872.645	92.7949	872.645	93.0636	872.645	93.3461	872.645	93.633	872.645	94.2199
873.127	92.4469	873.127	92.8366	873.127	93.103	873.127	93.3866	873.127	93.6796	873.127	94.2642
873.609	92.4908	873.609	92.8788	873.609	93.14	873.609	93.4281	873.609	93.7258	873.609	94.3093
874.091	92.5347	874.091	92.9202	874.091	93.1737	874.091	93.4697	874.091	93.77	874.091	94.3539
874.573	92.5772	874.573	92.9596	874.573	93.2042	874.573	93.5104	874.573	93.8111	874.573	94.397
875.056	92.6173	875.056	92.9964	875.056	93.2326	875.056	93.5499	875.056	93.8488	875.056	94.4379
875.538	92.6544	875.538	93.0309	875.538	93.2603	875.538	93.588	875.538	93.8837	875.538	94.4764
876.02	92.6889	876.02	93.0642	876.02	93.2893	876.02	93.6251	876.02	93.9168	876.02	94.5127
876.502	92.7212	876.502	93.0975	876.502	93.3209	876.502	93.6615	876.502	93.9492	876.502	94.5475
876.984	92.7523	876.984	93.1317	876.984	93.3559	876.984	93.6976	876.984	93.9818	876.984	94.5811
877.466	92.7829	877.466	93.1669	877.466	93.3941	877.466	93.7332	877.466	94.0149	877.466	94.6134
877.948	92.8134	877.948	93.2023	877.948	93.4345	877.948	93.768	877.948	94.0484	877.948	94.6439
878.431	92.8437	878.431	93.2362	878.431	93.4756	878.431	93.8013	878.431	94.0817	878.431	94.672
878.913	92.8734	878.913	93.2671	878.913	93.5154	878.913	93.8322	878.913	94.1139	878.913	94.697
879.395	92.9016	879.395	93.2938	879.395	93.5522	879.395	93.8601	879.395	94.1447	879.395	94.7188
879.877	92.9279	879.877	93.3163	879.877	93.5847	879.877	93.8849	879.877	94.174	879.877	94.7387
880.359	92.9521	880.359	93.3357	880.359	93.6125	880.359	93.9069	880.359	94.2023	880.359	94.7582
880.841	92.9745	880.841	93.3541	880.841	93.636	880.841	93.9274	880.841	94.2306	880.841	94.7795
881.323	92.9958	881.323	93.3735	881.323	93.6565	881.323	93.9476	881.323	94.2598	881.323	94.8043
881.805	93.0173	881.805	93.3958	881.805	93.6758	881.805	93.9693	881.805	94.2907	881.805	94.8336
882.288	93.0396	882.288	93.4213	882.288	93.6959	882.288	93.9933	882.288	94.323	882.288	94.8668
882.77	93.0634	882.77	93.4496	882.77	93.7186	882.77	94.0203	882.77	94.3562	882.77	94.9023
883.252	93.0888	883.252	93.4791	883.252	93.745	883.252	94.0499	883.252	94.3892	883.252	94.9375
883.734	93.1156	883.734	93.5076	883.734	93.775	883.734	94.0812	883.734	94.4209	883.734	94.9699
884.216	93.1431	884.216	93.5333	884.216	93.8079	884.216	94.1127	884.216	94.4504	884.216	94.9977
884.698	93.1707	884.698	93.5551	884.698	93.8419	884.698	94.1431	884.698	94.4777	884.698	95.0202
885.18	93.1978	885.18	93.5731	885.18	93.8751	885.18	94.1711	885.18	94.5032	885.18	95.0382
885.662	93.2239	885.662	93.5883	885.662	93.9059	885.662	94.1964	885.662	94.5276	885.662	95.0533
886.144	93.249	886.144	93.6027	886.144	93.9331	886.144	94.219	886.144	94.5516	886.144	95.0679
886.627	93.273	886.627	93.6184	886.627	93.9566	886.627	94.2401	886.627	94.5756	886.627	95.084
887.109	93.2962	887.109	93.6375	887.109	93.9771	887.109	94.261	887.109	94.5995	887.109	95.1031
887.591	93.3191	887.591	93.6614	887.591	93.996	887.591	94.2833	887.591	94.6231	887.591	95.1258
888.073	93.3423	888.073	93.6906	888.073	94.0151	888.073	94.3084	888.073	94.6461	888.073	95.1518
888.555	93.3669	888.555	93.7249	888.555	94.0358	888.555	94.3369	888.555	94.6688	888.555	95.1798
889.037	93.3935	889.037	93.763	889.037	94.0593	889.037	94.3689	889.037	94.6918	889.037	95.2088
889.519	93.4227	889.519	93.8034	889.519	94.0858	889.519	94.4033	889.519	94.716	889.519	95.2374
890.001	93.4545	890.001	93.8441	890.001	94.1153	890.001	94.4387	890.001	94.7421	890.001	95.2648
890.484	93.4882	890.484	93.8836	890.484	94.147	890.484	94.4734	890.484	94.7705	890.484	95.2904
890.966	93.5227	890.966	93.9205	890.966	94.1799	890.966	94.5059	890.966	94.8009	890.966	95.3144
891.448	93.557	891.448	93.9544	891.448	94.2133	891.448	94.5358	891.448	94.8328	891.448	95.3375
891.93	93.5904	891.93	93.9857	891.93	94.2467	891.93	94.5633	891.93	94.8654	891.93	95.3604
892.412	93.6229	892.412	94.0152	892.412	94.2801	892.412	94.5899	892.412	94.8983	892.412	95.3843
892.894	93.6556	892.894	94.0445	892.894	94.3137	892.894	94.6174	892.894	94.9318	892.894	95.4103
893.376	93.6898	893.376	94.0751	893.376	94.3478	893.376	94.6474	893.376	94.9666	893.376	95.4389
893.859	93.7271	893.859	94.1081	893.859	94.3826	893.859	94.6812	893.859	95.0036	893.859	95.4705
894.341	93.7679	894.341	94.1441	894.341	94.4175	894.341	94.7186	894.341	95.0429	894.341	95.5048
894.823	93.8117	894.823	94.1827	894.823	94.4521	894.823	94.7583	894.823	95.0837	894.823	95.5409
895.305	93.8567	895.305	94.223	895.305	94.4853	895.305	94.7985	895.305	95.1242	895.305	95.5776
895.787	93.9002	895.787	94.2633	895.787	94.5164	895.787	94.8368	895.787	95.162	895.787	95.6134
896.269	93.9397	896.269	94.3019	896.269	94.5449	896.269	94.8715	896.269	95.1944	896.269	95.6469
896.751	93.9734	896.751	94.3375	896.751	94.5711	896.751	94.9017	896.751	95.22	896.751	95.6771
897.233	94.0013	897.233	94.3694	897.233	94.596	897.233	94.9278	897.233	95.2387	897.233	95.7037
897.716	94.0248	897.716	94.3977	897.716	94.6208	897.716	94.9507	897.716	95.252	897.716	95.7271
898.198	94.0463	898.198	94.4232	898.198	94.6469	898.198	94.972	898.198	95.2626	898.198	95.748
898.68	94.0688	898.68	94.4473	898.68	94.6752	898.68	94.993	898.68	95.2736	898.68	95.7676
899.162	94.0941	899.162	94.471	899.162	94.7057	899.162	95.0146	899.162	95.2875	899.162	95.7868
899.644	94.1231	899.644	94.4953	899.644	94.7378	899.644	95.0369	899.644	95.3057	899.644	95.8059
900.126	94.1551	900.126	94.5203	900.126	94.77	900.126	95.0597	900.126	95.3282	900.126	95.825
900.608	94.1882	900.608	94.5455	900.608	94.8009	900.608	95.0823	900.608	95.3539	900.608	95.8434
901.09	94.2203	901.09	94.5701	901.09	94.8289	901.09	95.1042	901.09	95.381	901.09	95.8604
901.572	94.2496	901.572	94.5932	901.572	94.8531	901.572	95.1251	901.572	95.4078	901.572	95.8752
902.055	94.2751	902.055	94.6142	902.055	94.8733	902.055	95.1445	902.055	95.433	902.055	95.8879
902.537	94.2968	902.537	94.6332	902.537	94.8898	902.537	95.1624	902.537	95.4557	902.537	95.8987
903.019	94.3157	903.019	94.6506	903.019	94.9037	903.019	95.1787	903.019	95.4759	903.019	95.9086
903.501	94.3332	903.501	94.6675	903.501	94.9161	903.501	95.1937	903.501	95.494	903.501	95.9189
903.983	94.351	903.983	94.6847	903.983	94.9281	903.983	95.2076	903.983	95.5108	903.983	95.9305
904.465	94.3704	904.465	94.7032	904.465	94.9409	904.465	95.2212	904.465	95.527	904.465	95.9442
904.947	94.3919	904.947	94.7236	904.947	94.9554	904.947	95.2355	904.947	95.5435	904.947	95.96
905.429	94.4161	905.429	94.746	905.429	94.9725	905.429	95.2518	905.429	95.5611	905.429	95.9772
905.912	94.4426	905.912	94.7703	905.912	94.9925	905.912	95.2709	905.912	95.5802	905.912	95.9948
906.394	94.4709	906.394	94.7964	906.394	95.0158	906.394	95.2935	906.394	95.6007	906.394	96.0115
906.876	94.5003	906.876	94.8241	906.876	95.042	906.876	95.3195	906.876	95.6223	906.876	96.0263
907.358	94.5301	907.358	94.8534	907.358	95.0704	907.358	95.3482	907.358	95.6438	907.358	96.0383
907.84	94.5596	907.84	94.884	907.84	95.1	907.84	95.3784	907.84	95.6643	907.84	96.0476
908.322	94.5885	908.322	94.9158	908.322	95.1296	908.322	95.4088	908.322	95.6825	908.322	96.0545
908.804	94.6169	908.804	94.9485	908.804	95.1583	908.804	95.4383	908.804	95.6981	908.804	96.0596
909.287	94.6448	909.287	94.9813	909.287	95.1853	909.287	95.4665	909.287	95.7113	909.287	96.064
909.769	94.6725	909.769	95.0136	909.769	95.2106	909.769	95.4932	909.769	95.7231	909.769	96.0688
910.251	94.7	910.251	95.045	910.251	95.2347	910.251	95.5186	910.251	95.735	910.251	96.075
910.733	94.7274	910.733	95.0748	910.733	95.2583	910.733	95.543	910.733	95.7488	910.733	96.083
911.215	94.754	911.215	95.1029	911.215	95.282	911.215	95.5667	911.215	95.7654	911.215	96.0931
911.697	94.7795	911.697	95.1292	911.697	95.306	911.697	95.5895	911.697	95.7851	911.697	96.1048
912.179	94.8034	912.179	95.1535	912.179	95.3301	912.179	95.6111	912.179	95.807	912.179	96.1174
912.661	94.8255	912.661	95.1759	912.661	95.3534	912.661	95.631	912.661	95.8297	912.661	96.1298
913.144	94.846	913.144	95.196	913.144	95.3748	913.144	95.6489	913.144	95.8509	913.144	96.1408
913.626	94.8651	913.626	95.2139	913.626	95.3934	913.626	95.6644	913.626	95.8688	913.626	96.1495
914.108	94.8837	914.108	95.2294	914.108	95.4091	914.108	95.6776	914.108	95.8823	914.108	96.1555
914.59	94.9022	914.59	95.2432	914.59	95.4224	914.59	95.6886	914.59	95.891	914.59	96.1587
915.072	94.9208	915.072	95.2559	915.072	95.4345	915.072	95.6979	915.072	95.8956	915.072	96.1597
915.554	94.9396	915.554	95.2688	915.554	95.4473	915.554	95.706	915.554	95.8979	915.554	96.1593
916.036	94.9587	916.036	95.283	916.036	95.4623	916.036	95.7137	916.036	95.8995	916.036	96.1583
916.518	94.978	916.518	95.2993	916.518	95.4804	916.518	95.7218	916.518	95.9022	916.518	96.1575
917	94.998	917	95.318	917	95.5019	917	95.7312	917	95.907	917	96.1575
917.483	95.019	917.483	95.3387	917.483	95.5257	917.483	95.7425	917.483	95.9142	917.483	96.1585
917.965	95.0413	917.965	95.3604	917.965	95.5505	917.965	95.7562	917.965	95.9234	917.965	96.1601
918.447	95.0653	918.447	95.3817	918.447	95.5746	918.447	95.7721	918.447	95.9336	918.447	96.1621
918.929	95.0906	918.929	95.4015	918.929	95.5968	918.929	95.7898	918.929	95.9437	918.929	96.1638
919.411	95.1164	919.411	95.4188	919.411	95.6164	919.411	95.8085	919.411	95.953	919.411	96.1643
919.893	95.1417	919.893	95.4334	919.893	95.6336	919.893	95.8274	919.893	95.9609	919.893	96.1632
920.375	95.1653	920.375	95.4457	920.375	95.6487	920.375	95.8457	920.375	95.9677	920.375	96.1598
920.857	95.1862	920.857	95.456	920.857	95.6622	920.857	95.8628	920.857	95.9735	920.857	96.154
921.34	95.2037	921.34	95.4651	921.34	95.674	921.34	95.8783	921.34	95.9785	921.34	96.1458
921.822	95.2177	921.822	95.4733	921.822	95.6837	921.822	95.8918	921.822	95.9823	921.822	96.1352
922.304	95.2282	922.304	95.4804	922.304	95.6903	922.304	95.9024	922.304	95.9844	922.304	96.1225
922.786	95.2359	922.786	95.4861	922.786	95.693	922.786	95.9095	922.786	95.9837	922.786	96.1077
923.268	95.2413	923.268	95.4901	923.268	95.6912	923.268	95.9122	923.268	95.9797	923.268	96.0904
923.75	95.2451	923.75	95.4922	923.75	95.6853	923.75	95.9099	923.75	95.9719	923.75	96.0703
924.232	95.2481	924.232	95.4927	924.232	95.6762	924.232	95.9027	924.232	95.9608	924.232	96.0468
924.715	95.2511	924.715	95.4923	924.715	95.6659	924.715	95.8913	924.715	95.9476	924.715	96.0194
925.197	95.2547	925.197	95.4918	925.197	95.6563	925.197	95.8769	925.197	95.9338	925.197	95.9884
925.679	95.2592	925.679	95.4922	925.679	95.6491	925.679	95.8615	925.679	95.9206	925.679	95.9543
926.161	95.2648	926.161	95.4942	926.161	95.6451	926.161	95.8466	926.161	95.9089	926.161	95.9182
926.643	95.271	926.643	95.4978	926.643	95.6445	926.643	95.8334	926.643	95.899	926.643	95.8817
927.125	95.2773	927.125	95.5028	927.125	95.6463	927.125	95.8224	927.125	95.8905	927.125	95.846
927.607	95.2832	927.607	95.5089	927.607	95.6495	927.607	95.8135	927.607	95.8824	927.607	95.8121
928.089	95.2884	928.089	95.5156	928.089	95.6529	928.089	95.8061	928.089	95.8742	928.089	95.7799
928.572	95.2931	928.572	95.5225	928.572	95.6555	928.572	95.7995	928.572	95.8654	928.572	95.7491
929.054	95.2979	929.054	95.5296	929.054	95.6571	929.054	95.7934	929.054	95.856	929.054	95.7185
929.536	95.304	929.536	95.5371	929.536	95.6578	929.536	95.7876	929.536	95.8465	929.536	95.6871
930.018	95.312	930.018	95.5448	930.018	95.658	930.018	95.7823	930.018	95.837	930.018	95.6542
930.5	95.3224	930.5	95.5527	930.5	95.6579	930.5	95.7775	930.5	95.8276	930.5	95.6195
930.982	95.3351	930.982	95.5602	930.982	95.6577	930.982	95.773	930.982	95.8181	930.982	95.5836
931.464	95.3491	931.464	95.567	931.464	95.6576	931.464	95.7685	931.464	95.8078	931.464	95.5474
931.946	95.3635	931.946	95.5725	931.946	95.6573	931.946	95.7635	931.946	95.7965	931.946	95.5124
932.428	95.3771	932.428	95.5768	932.428	95.6569	932.428	95.758	932.428	95.7843	932.428	95.4802
932.911	95.3895	932.911	95.5803	932.911	95.6566	932.911	95.7524	932.911	95.7716	932.911	95.4524
933.393	95.4008	933.393	95.5841	933.393	95.6571	933.393	95.7484	933.393	95.7599	933.393	95.4304
933.875	95.412	933.875	95.5894	933.875	95.6594	933.875	95.748	933.875	95.7507	933.875	95.4153
934.357	95.4242	934.357	95.5976	934.357	95.6647	934.357	95.7535	934.357	95.7456	934.357	95.4078
934.839	95.4387	934.839	95.6094	934.839	95.674	934.839	95.7665	934.839	95.7456	934.839	95.408
935.321	95.4561	935.321	95.625	935.321	95.6878	935.321	95.7874	935.321	95.7511	935.321	95.4151
935.803	95.4769	935.803	95.644	935.803	95.7062	935.803	95.8153	935.803	95.7619	935.803	95.4279
936.285	95.5004	936.285	95.6654	936.285	95.7284	936.285	95.8475	936.285	95.7768	936.285	95.4444
936.768	95.5258	936.768	95.6876	936.768	95.7531	936.768	95.8807	936.768	95.7948	936.768	95.4623
937.25	95.5521	937.25	95.7094	937.25	95.7787	937.25	95.9111	937.25	95.8144	937.25	95.4794
937.732	95.5782	937.732	95.7295	937.732	95.8034	937.732	95.9358	937.732	95.834	937.732	95.4939
938.214	95.6034	938.214	95.747	938.214	95.8256	938.214	95.953	938.214	95.8525	938.214	95.5045
938.696	95.6271	938.696	95.7616	938.696	95.8443	938.696	95.9624	938.696	95.8687	938.696	95.5109
939.178	95.6493	939.178	95.7734	939.178	95.859	939.178	95.965	939.178	95.8819	939.178	95.5131
939.66	95.6698	939.66	95.7829	939.66	95.8695	939.66	95.9629	939.66	95.8917	939.66	95.5118
940.143	95.6889	940.143	95.7909	940.143	95.8765	940.143	95.9586	940.143	95.898	940.143	95.508
940.625	95.7067	940.625	95.7984	940.625	95.8809	940.625	95.9543	940.625	95.9012	940.625	95.5025
941.107	95.7233	941.107	95.8064	941.107	95.8837	941.107	95.9517	941.107	95.9019	941.107	95.4959
941.589	95.739	941.589	95.8158	941.589	95.8861	941.589	95.952	941.589	95.901	941.589	95.4889
942.071	95.7541	942.071	95.8272	942.071	95.8894	942.071	95.9555	942.071	95.8991	942.071	95.4814
942.553	95.7692	942.553	95.8404	942.553	95.8943	942.553	95.9617	942.553	95.8967	942.553	95.4736
943.035	95.7848	943.035	95.855	943.035	95.9014	943.035	95.9697	943.035	95.894	943.035	95.4651
943.517	95.8014	943.517	95.8702	943.517	95.9108	943.517	95.9787	943.517	95.8911	943.517	95.4556
944	95.8193	944	95.8851	944	95.9218	944	95.9874	944	95.8881	944	95.4449
944.482	95.8386	944.482	95.8986	944.482	95.9337	944.482	95.9952	944.482	95.8852	944.482	95.4327
944.964	95.8588	944.964	95.9102	944.964	95.9452	944.964	96.0014	944.964	95.8829	944.964	95.4192
945.446	95.8789	945.446	95.9196	945.446	95.9553	945.446	96.0059	945.446	95.8816	945.446	95.4047
945.928	95.8977	945.928	95.9271	945.928	95.9633	945.928	96.0086	945.928	95.8819	945.928	95.3899
946.41	95.9141	946.41	95.933	946.41	95.9688	946.41	96.0099	946.41	95.884	946.41	95.3758
946.892	95.9272	946.892	95.9379	946.892	95.972	946.892	96.0101	946.892	95.8875	946.892	95.3631
947.374	95.9368	947.374	95.9422	947.374	95.9736	947.374	96.0097	947.374	95.8919	947.374	95.3529
947.856	95.9435	947.856	95.9465	947.856	95.9746	947.856	96.009	947.856	95.8965	947.856	95.3455
948.339	95.9481	948.339	95.951	948.339	95.9757	948.339	96.0086	948.339	95.9004	948.339	95.3413
948.821	95.952	948.821	95.9562	948.821	95.9778	948.821	96.0091	948.821	95.9032	948.821	95.3401
949.303	95.9566	949.303	95.9622	949.303	95.9814	949.303	96.0112	949.303	95.9053	949.303	95.3417
949.785	95.9626	949.785	95.9694	949.785	95.9867	949.785	96.0153	949.785	95.9072	949.785	95.3457
950.267	95.9705	950.267	95.9778	950.267	95.9942	950.267	96.022	950.267	95.9098	950.267	95.3519
950.749	95.98	950.749	95.9876	950.749	96.0039	950.749	96.0315	950.749	95.9143	950.749	95.36
951.231	95.9909	951.231	95.9985	951.231	96.0161	951.231	96.0436	951.231	95.9213	951.231	95.3702
951.713	96.0028	951.713	96.0103	951.713	96.0307	951.713	96.0581	951.713	95.9314	951.713	95.3827
952.196	96.0157	952.196	96.0231	952.196	96.0477	952.196	96.0744	952.196	95.9447	952.196	95.3982
952.678	96.0299	952.678	96.037	952.678	96.0666	952.678	96.0923	952.678	95.9611	952.678	95.4171
953.16	96.046	953.16	96.0523	953.16	96.0873	953.16	96.1118	953.16	95.9804	953.16	95.4403
953.642	96.0646	953.642	96.0695	953.642	96.1091	953.642	96.1331	953.642	96.0026	953.642	95.468
954.124	96.0859	954.124	96.0889	954.124	96.132	954.124	96.1563	954.124	96.0276	954.124	95.5002
954.606	96.1098	954.606	96.1105	954.606	96.1557	954.606	96.1817	954.606	96.0556	954.606	95.5366
955.088	96.1354	955.088	96.1337	955.088	96.18	955.088	96.2091	955.088	96.0863	955.088	95.5761
955.57	96.1612	955.57	96.1574	955.57	96.2049	955.57	96.2377	955.57	96.1194	955.57	95.6177
956.053	96.1856	956.053	96.1805	956.053	96.2296	956.053	96.2664	956.053	96.1542	956.053	95.6604
956.535	96.207	956.535	96.2021	956.535	96.2534	956.535	96.2942	956.535	96.1898	956.535	95.7034
957.017	96.2242	957.017	96.2215	957.017	96.2756	957.017	96.3202	957.017	96.2255	957.017	95.7463
957.499	96.2369	957.499	96.2391	957.499	96.2954	957.499	96.3443	957.499	96.2607	957.499	95.7891
957.981	96.2452	957.981	96.2555	957.981	96.3127	957.981	96.3668	957.981	96.295	957.981	95.8322
958.463	96.2504	958.463	96.2718	958.463	96.3282	958.463	96.3889	958.463	96.3284	958.463	95.8759
958.945	96.254	958.945	96.2888	958.945	96.3429	958.945	96.4117	958.945	96.3611	958.945	95.9201
959.427	96.2575	959.427	96.3071	959.427	96.3581	959.427	96.4364	959.427	96.3933	959.427	95.9644
959.909	96.2623	959.909	96.3263	959.909	96.3752	959.909	96.4632	959.909	96.4249	959.909	96.0082
960.392	96.2693	960.392	96.3458	960.392	96.3948	960.392	96.4921	960.392	96.4557	960.392	96.0505
960.874	96.2786	960.874	96.3648	960.874	96.4166	960.874	96.5222	960.874	96.4854	960.874	96.0908
961.356	96.29	961.356	96.3828	961.356	96.4399	961.356	96.5528	961.356	96.5138	961.356	96.129
961.838	96.3029	961.838	96.3997	961.838	96.4634	961.838	96.5828	961.838	96.5407	961.838	96.1655
962.32	96.3168	962.32	96.4161	962.32	96.4859	962.32	96.6116	962.32	96.5666	962.32	96.2013
962.802	96.3312	962.802	96.4328	962.802	96.5067	962.802	96.6392	962.802	96.5921	962.802	96.2372
963.284	96.3458	963.284	96.4507	963.284	96.5259	963.284	96.6655	963.284	96.6177	963.284	96.2738
963.766	96.3606	963.766	96.4702	963.766	96.544	963.766	96.6904	963.766	96.6438	963.766	96.3112
964.249	96.3751	964.249	96.4911	964.249	96.562	964.249	96.7138	964.249	96.6702	964.249	96.3483
964.731	96.389	964.731	96.5124	964.731	96.5805	964.731	96.7351	964.731	96.6961	964.731	96.3837
965.213	96.4019	965.213	96.5327	965.213	96.6	965.213	96.7541	965.213	96.7204	965.213	96.4156
965.695	96.4132	965.695	96.5508	965.695	96.6202	965.695	96.7706	965.695	96.7419	965.695	96.4428
966.177	96.4228	966.177	96.5656	966.177	96.6407	966.177	96.7847	966.177	96.7599	966.177	96.4647
966.659	96.4312	966.659	96.5771	966.659	96.661	966.659	96.7971	966.659	96.7745	966.659	96.4817
967.141	96.439	967.141	96.5856	967.141	96.6803	967.141	96.8087	967.141	96.7866	967.141	96.4953
967.624	96.4475	967.624	96.5923	967.624	96.6982	967.624	96.8204	967.624	96.7974	967.624	96.5071
968.106	96.4578	968.106	96.5987	968.106	96.7146	968.106	96.833	968.106	96.8083	968.106	96.519
968.588	96.4707	968.588	96.6059	968.588	96.7291	968.588	96.8467	968.588	96.8205	968.588	96.5319
969.07	96.4861	969.07	96.615	969.07	96.7418	969.07	96.8613	969.07	96.8339	969.07	96.5462
969.552	96.5033	969.552	96.6261	969.552	96.7525	969.552	96.8759	969.552	96.8481	969.552	96.5611
970.034	96.521	970.034	96.639	970.034	96.7611	970.034	96.8898	970.034	96.8617	970.034	96.5754
970.516	96.5376	970.516	96.6529	970.516	96.7678	970.516	96.9021	970.516	96.8736	970.516	96.5875
970.998	96.5519	970.998	96.6665	970.998	96.773	970.998	96.9122	970.998	96.8826	970.998	96.5964
971.481	96.5633	971.481	96.6791	971.481	96.7773	971.481	96.92	971.481	96.8885	971.481	96.6017
971.963	96.5721	971.963	96.6896	971.963	96.7813	971.963	96.9256	971.963	96.8914	971.963	96.6036
972.445	96.5789	972.445	96.6978	972.445	96.7857	972.445	96.929	972.445	96.8921	972.445	96.6026
972.927	96.585	972.927	96.7041	972.927	96.7906	972.927	96.9308	972.927	96.8914	972.927	96.5996
973.409	96.5919	973.409	96.709	973.409	96.7962	973.409	96.9311	973.409	96.8899	973.409	96.5948
973.891	96.6005	973.891	96.7134	973.891	96.802	973.891	96.9302	973.891	96.8876	973.891	96.5884
974.373	96.6112	974.373	96.7183	974.373	96.8078	974.373	96.9282	974.373	96.8843	974.373	96.5801
974.855	96.6239	974.855	96.724	974.855	96.8129	974.855	96.9252	974.855	96.8792	974.855	96.5692
975.337	96.6378	975.337	96.7307	975.337	96.8171	975.337	96.921	975.337	96.8717	975.337	96.5554
975.82	96.6517	975.82	96.7379	975.82	96.82	975.82	96.9155	975.82	96.8614	975.82	96.5381
976.302	96.6643	976.302	96.7449	976.302	96.8214	976.302	96.9085	976.302	96.8482	976.302	96.5174
976.784	96.6749	976.784	96.7511	976.784	96.8209	976.784	96.8996	976.784	96.8322	976.784	96.4934
977.266	96.6829	977.266	96.7561	977.266	96.8184	977.266	96.8889	977.266	96.8139	977.266	96.4661
977.748	96.6889	977.748	96.7597	977.748	96.8139	977.748	96.8763	977.748	96.7938	977.748	96.4356
978.23	96.6937	978.23	96.7625	978.23	96.8075	978.23	96.8622	978.23	96.7726	978.23	96.4014
978.712	96.6986	978.712	96.7648	978.712	96.7996	978.712	96.8471	978.712	96.7504	978.712	96.3634
979.194	96.7049	979.194	96.7673	979.194	96.7909	979.194	96.8314	979.194	96.7278	979.194	96.3211
979.677	96.7132	979.677	96.7702	979.677	96.7819	979.677	96.8157	979.677	96.7046	979.677	96.2748
980.159	96.7234	980.159	96.7733	980.159	96.7732	980.159	96.8002	980.159	96.681	980.159	96.2248
980.641	96.7344	980.641	96.7761	980.641	96.7647	980.641	96.785	980.641	96.657	980.641	96.1721
981.123	96.745	981.123	96.7779	981.123	96.7563	981.123	96.77	981.123	96.6324	981.123	96.118
981.605	96.7533	981.605	96.7778	981.605	96.7474	981.605	96.7549	981.605	96.6071	981.605	96.0636
982.087	96.7584	982.087	96.7751	982.087	96.7374	982.087	96.7392	982.087	96.5809	982.087	96.01
982.569	96.7599	982.569	96.7695	982.569	96.7256	982.569	96.7225	982.569	96.554	982.569	95.9582
983.052	96.758	983.052	96.7607	983.052	96.7119	983.052	96.7047	983.052	96.5262	983.052	95.9088
983.534	96.7538	983.534	96.7489	983.534	96.6967	983.534	96.6857	983.534	96.4981	983.534	95.8626
984.016	96.7481	984.016	96.7346	984.016	96.6806	984.016	96.666	984.016	96.4702	984.016	95.8201
984.498	96.742	984.498	96.7186	984.498	96.6648	984.498	96.6463	984.498	96.4434	984.498	95.7824
984.98	96.7356	984.98	96.7019	984.98	96.6503	984.98	96.6277	984.98	96.4189	984.98	95.7501
985.462	96.7292	985.462	96.6858	985.462	96.6383	985.462	96.6115	985.462	96.3979	985.462	95.7244
985.944	96.7226	985.944	96.6717	985.944	96.6297	985.944	96.599	985.944	96.3816	985.944	95.7058
986.426	96.7157	986.426	96.6608	986.426	96.6248	986.426	96.5914	986.426	96.371	986.426	95.6947
986.909	96.7089	986.909	96.6541	986.909	96.6238	986.909	96.5895	986.909	96.3667	986.909	95.6912
987.391	96.7029	987.391	96.6521	987.391	96.6264	987.391	96.5935	987.391	96.3687	987.391	95.6951
987.873	96.6986	987.873	96.6545	987.873	96.6321	987.873	96.6032	987.873	96.3769	987.873	95.7062
988.355	96.6971	988.355	96.661	988.355	96.6404	988.355	96.618	988.355	96.3907	988.355	95.7241
988.837	96.6992	988.837	96.671	988.837	96.6509	988.837	96.6372	988.837	96.4097	988.837	95.7489
989.319	96.7055	989.319	96.684	989.319	96.6635	989.319	96.6603	989.319	96.4335	989.319	95.7804
989.801	96.7162	989.801	96.6995	989.801	96.6786	989.801	96.6867	989.801	96.4619	989.801	95.8188
990.283	96.7311	990.283	96.7175	990.283	96.6967	990.283	96.7163	990.283	96.4949	990.283	95.8639
990.765	96.7498	990.765	96.7381	990.765	96.7183	990.765	96.7489	990.765	96.5325	990.765	95.9154
991.248	96.7716	991.248	96.7613	991.248	96.744	991.248	96.7841	991.248	96.5746	991.248	95.9726
991.73	96.7954	991.73	96.7869	991.73	96.7735	991.73	96.8213	991.73	96.6207	991.73	96.0346
992.212	96.82	992.212	96.8143	992.212	96.8063	992.212	96.8596	992.212	96.6699	992.212	96.1
992.694	96.8441	992.694	96.8428	992.694	96.841	992.694	96.8981	992.694	96.7211	992.694	96.1673
993.176	96.8666	993.176	96.8715	993.176	96.8761	993.176	96.9357	993.176	96.7727	993.176	96.2351
993.658	96.8867	993.658	96.8995	993.658	96.9102	993.658	96.9719	993.658	96.8236	993.658	96.302
994.14	96.9043	994.14	96.9262	994.14	96.9422	994.14	97.0064	994.14	96.8728	994.14	96.3667
994.622	96.9196	994.622	96.9511	994.622	96.9714	994.622	97.0395	994.622	96.9194	994.622	96.4283
995.105	96.9334	995.105	96.9739	995.105	96.9981	995.105	97.0715	995.105	96.9632	995.105	96.4862
995.587	96.9465	995.587	96.9946	995.587	97.0226	995.587	97.1027	995.587	97.004	995.587	96.5399
996.069	96.9594	996.069	97.0131	996.069	97.0457	996.069	97.1332	996.069	97.0417	996.069	96.5895
996.551	96.9723	996.551	97.0296	996.551	97.068	996.551	97.1626	996.551	97.0762	996.551	96.635
997.033	96.985	997.033	97.0442	997.033	97.09	997.033	97.1904	997.033	97.1075	997.033	96.677
997.515	96.9972	997.515	97.0574	997.515	97.1117	997.515	97.2159	997.515	97.1356	997.515	96.7157
997.997	97.0084	997.997	97.0698	997.997	97.1331	997.997	97.2388	997.997	97.1606	997.997	96.7519
998.48	97.0184	998.48	97.0817	998.48	97.1537	998.48	97.2589	998.48	97.1827	998.48	96.7857
998.962	97.0273	998.962	97.0938	998.962	97.1732	998.962	97.2766	998.962	97.2022	998.962	96.8175
999.444	97.0354	999.444	97.1061	999.444	97.191	999.444	97.2922	999.444	97.2194	999.444	96.8472
999.926	97.0429	999.926	97.1187	999.926	97.2065	999.926	97.3064	999.926	97.2349	999.926	96.8747
1000.41	97.0498	1000.41	97.1313	1000.41	97.2193	1000.41	97.3193	1000.41	97.2489	1000.41	96.8995
1000.89	97.0562	1000.89	97.1435	1000.89	97.2291	1000.89	97.3311	1000.89	97.262	1000.89	96.9216
1001.37	97.0621	1001.37	97.1548	1001.37	97.2357	1001.37	97.3414	1001.37	97.2743	1001.37	96.9407
1001.85	97.0675	1001.85	97.1651	1001.85	97.2395	1001.85	97.3499	1001.85	97.2863	1001.85	96.957
1002.34	97.0726	1002.34	97.1743	1002.34	97.241	1002.34	97.3563	1002.34	97.2984	1002.34	96.9712
1002.82	97.0778	1002.82	97.1825	1002.82	97.2413	1002.82	97.3607	1002.82	97.3107	1002.82	96.984
1003.3	97.0835	1003.3	97.1898	1003.3	97.2413	1003.3	97.3635	1003.3	97.3231	1003.3	96.9961
1003.78	97.0899	1003.78	97.1962	1003.78	97.2417	1003.78	97.3651	1003.78	97.3354	1003.78	97.008
1004.26	97.097	1004.26	97.2017	1004.26	97.2433	1004.26	97.3664	1004.26	97.3472	1004.26	97.0199
1004.75	97.104	1004.75	97.2064	1004.75	97.2462	1004.75	97.3679	1004.75	97.358	1004.75	97.0316
1005.23	97.1103	1005.23	97.2104	1005.23	97.2504	1005.23	97.37	1005.23	97.3672	1005.23	97.0425
1005.71	97.1154	1005.71	97.2135	1005.71	97.2557	1005.71	97.3727	1005.71	97.3747	1005.71	97.052
1006.19	97.1185	1006.19	97.2158	1006.19	97.2617	1006.19	97.3761	1006.19	97.3805	1006.19	97.0597
1006.68	97.1198	1006.68	97.2174	1006.68	97.2678	1006.68	97.3799	1006.68	97.3847	1006.68	97.0655
1007.16	97.1193	1007.16	97.218	1007.16	97.2735	1007.16	97.3839	1007.16	97.3875	1007.16	97.0695
1007.64	97.1173	1007.64	97.2173	1007.64	97.2779	1007.64	97.3879	1007.64	97.389	1007.64	97.0722
1008.12	97.1139	1008.12	97.2151	1008.12	97.2804	1008.12	97.3917	1008.12	97.3891	1008.12	97.074
1008.6	97.1092	1008.6	97.211	1008.6	97.2803	1008.6	97.3951	1008.6	97.3874	1008.6	97.0752
1009.09	97.1031	1009.09	97.2053	1009.09	97.2772	1009.09	97.3978	1009.09	97.3837	1009.09	97.0757
1009.57	97.0958	1009.57	97.1983	1009.57	97.2713	1009.57	97.3995	1009.57	97.3777	1009.57	97.0754
1010.05	97.0875	1010.05	97.1908	1010.05	97.2631	1010.05	97.3997	1010.05	97.3695	1010.05	97.0734
1010.53	97.0787	1010.53	97.1836	1010.53	97.2536	1010.53	97.3985	1010.53	97.3595	1010.53	97.0693
1011.01	97.0705	1011.01	97.1774	1011.01	97.2439	1011.01	97.3957	1011.01	97.3485	1011.01	97.0625
1011.5	97.0636	1011.5	97.1726	1011.5	97.235	1011.5	97.3916	1011.5	97.3371	1011.5	97.0529
1011.98	97.0586	1011.98	97.1688	1011.98	97.2273	1011.98	97.3864	1011.98	97.3261	1011.98	97.0403
1012.46	97.0557	1012.46	97.1655	1012.46	97.2207	1012.46	97.3805	1012.46	97.3158	1012.46	97.025
1012.94	97.0546	1012.94	97.162	1012.94	97.2144	1012.94	97.3739	1012.94	97.3064	1012.94	97.0076
1013.42	97.0548	1013.42	97.1575	1013.42	97.2076	1013.42	97.3667	1013.42	97.2978	1013.42	96.9887
1013.91	97.0559	1013.91	97.1517	1013.91	97.1996	1013.91	97.3587	1013.91	97.2898	1013.91	96.9689
1014.39	97.0573	1014.39	97.1449	1014.39	97.1902	1014.39	97.3497	1014.39	97.282	1014.39	96.949
1014.87	97.0592	1014.87	97.1376	1014.87	97.18	1014.87	97.3398	1014.87	97.2742	1014.87	96.9296
1015.35	97.0615	1015.35	97.1307	1015.35	97.1697	1015.35	97.3291	1015.35	97.266	1015.35	96.9113
1015.84	97.0644	1015.84	97.1248	1015.84	97.1604	1015.84	97.3183	1015.84	97.2574	1015.84	96.894
1016.32	97.068	1016.32	97.1205	1016.32	97.153	1016.32	97.3079	1016.32	97.2483	1016.32	96.8777
1016.8	97.0719	1016.8	97.1179	1016.8	97.1475	1016.8	97.2984	1016.8	97.2387	1016.8	96.8618
1017.28	97.0758	1017.28	97.1169	1017.28	97.1436	1017.28	97.2901	1017.28	97.2289	1017.28	96.8457
1017.76	97.0795	1017.76	97.1172	1017.76	97.1408	1017.76	97.2831	1017.76	97.219	1017.76	96.8286
1018.25	97.0829	1018.25	97.1183	1018.25	97.1383	1018.25	97.2771	1018.25	97.2092	1018.25	96.8101
1018.73	97.0861	1018.73	97.1197	1018.73	97.1355	1018.73	97.2716	1018.73	97.1995	1018.73	96.7899
1019.21	97.0892	1019.21	97.1211	1019.21	97.1322	1019.21	97.266	1019.21	97.1896	1019.21	96.768
1019.69	97.0923	1019.69	97.1218	1019.69	97.1284	1019.69	97.2597	1019.69	97.1789	1019.69	96.7445
1020.17	97.0952	1020.17	97.1213	1020.17	97.1241	1020.17	97.2521	1020.17	97.1667	1020.17	96.7191
1020.66	97.0974	1020.66	97.1186	1020.66	97.119	1020.66	97.2426	1020.66	97.1523	1020.66	96.6918
1021.14	97.098	1021.14	97.1131	1021.14	97.1124	1021.14	97.2306	1021.14	97.1354	1021.14	96.6619
1021.62	97.0963	1021.62	97.1042	1021.62	97.1034	1021.62	97.2156	1021.62	97.116	1021.62	96.6289
1022.1	97.0916	1022.1	97.0915	1022.1	97.091	1022.1	97.1972	1022.1	97.0942	1022.1	96.5924
1022.59	97.0838	1022.59	97.075	1022.59	97.0745	1022.59	97.1755	1022.59	97.0708	1022.59	96.5523
1023.07	97.0729	1023.07	97.0551	1023.07	97.0537	1023.07	97.1506	1023.07	97.0462	1023.07	96.5087
1023.55	97.0595	1023.55	97.0324	1023.55	97.0294	1023.55	97.1234	1023.55	97.0206	1023.55	96.4622
1024.03	97.0444	1024.03	97.008	1024.03	97.0026	1024.03	97.0948	1024.03	96.9938	1024.03	96.4136
1024.51	97.0282	1024.51	96.9828	1024.51	96.975	1024.51	97.066	1024.51	96.9655	1024.51	96.3636
1025	97.0117	1025	96.9579	1025	96.9482	1025	97.038	1025	96.9355	1025	96.3132
1025.48	96.9957	1025.48	96.9345	1025.48	96.9237	1025.48	97.0116	1025.48	96.9038	1025.48	96.2629
1025.96	96.9809	1025.96	96.9133	1025.96	96.9023	1025.96	96.9873	1025.96	96.8709	1025.96	96.2133
1026.44	96.9682	1026.44	96.8952	1026.44	96.8845	1026.44	96.9654	1026.44	96.8379	1026.44	96.1651
1026.92	96.9581	1026.92	96.8805	1026.92	96.8701	1026.92	96.9458	1026.92	96.8059	1026.92	96.1186
1027.41	96.9509	1027.41	96.8693	1027.41	96.8586	1027.41	96.9282	1027.41	96.776	1027.41	96.0741
1027.89	96.9463	1027.89	96.861	1027.89	96.849	1027.89	96.9119	1027.89	96.7487	1027.89	96.0315
1028.37	96.9434	1028.37	96.8546	1028.37	96.8399	1028.37	96.8961	1028.37	96.7238	1028.37	95.9901
1028.85	96.9408	1028.85	96.8488	1028.85	96.83	1028.85	96.8798	1028.85	96.7004	1028.85	95.949
1029.34	96.9368	1029.34	96.8425	1029.34	96.8181	1029.34	96.8619	1029.34	96.6772	1029.34	95.9067
1029.82	96.9301	1029.82	96.8342	1029.82	96.8032	1029.82	96.8413	1029.82	96.653	1029.82	95.8622
1030.3	96.9201	1030.3	96.8234	1030.3	96.785	1030.3	96.8177	1030.3	96.6268	1030.3	95.8147
1030.78	96.9069	1030.78	96.8098	1030.78	96.7641	1030.78	96.7912	1030.78	96.5983	1030.78	95.7641
1031.26	96.8916	1031.26	96.7938	1031.26	96.7415	1031.26	96.7626	1031.26	96.5677	1031.26	95.7108
1031.75	96.8755	1031.75	96.7762	1031.75	96.7184	1031.75	96.7331	1031.75	96.5354	1031.75	95.6557
1032.23	96.8602	1032.23	96.758	1032.23	96.6961	1032.23	96.704	1032.23	96.5022	1032.23	95.6002
1032.71	96.8467	1032.71	96.74	1032.71	96.6752	1032.71	96.6761	1032.71	96.4686	1032.71	95.545
1033.19	96.8353	1033.19	96.7226	1033.19	96.6557	1033.19	96.6497	1033.19	96.4348	1033.19	95.4908
1033.67	96.8257	1033.67	96.7058	1033.67	96.6368	1033.67	96.6245	1033.67	96.4012	1033.67	95.438
1034.16	96.8168	1034.16	96.6894	1034.16	96.6174	1034.16	96.5995	1034.16	96.3675	1034.16	95.3867
1034.64	96.8076	1034.64	96.6728	1034.64	96.5966	1034.64	96.574	1034.64	96.334	1034.64	95.337
1035.12	96.7969	1035.12	96.6557	1035.12	96.574	1035.12	96.5473	1035.12	96.3006	1035.12	95.2891
1035.6	96.7847	1035.6	96.6382	1035.6	96.5499	1035.6	96.5196	1035.6	96.2679	1035.6	95.243
1036.09	96.771	1036.09	96.6204	1036.09	96.5254	1036.09	96.4913	1036.09	96.236	1036.09	95.1988
1036.57	96.7567	1036.57	96.6031	1036.57	96.5017	1036.57	96.4633	1036.57	96.2051	1036.57	95.1564
1037.05	96.7427	1037.05	96.5871	1037.05	96.48	1037.05	96.4364	1037.05	96.1753	1037.05	95.1152
1037.53	96.7297	1037.53	96.5728	1037.53	96.4609	1037.53	96.4112	1037.53	96.1463	1037.53	95.0747
1038.01	96.7182	1038.01	96.5604	1038.01	96.4442	1038.01	96.3877	1038.01	96.1181	1038.01	95.034
1038.5	96.708	1038.5	96.5495	1038.5	96.4291	1038.5	96.3658	1038.5	96.0904	1038.5	94.9929
1038.98	96.6984	1038.98	96.5392	1038.98	96.4142	1038.98	96.3452	1038.98	96.0632	1038.98	94.9512
1039.46	96.6889	1039.46	96.5283	1039.46	96.3984	1039.46	96.3254	1039.46	96.0368	1039.46	94.9095
1039.94	96.6786	1039.94	96.5159	1039.94	96.3811	1039.94	96.3065	1039.94	96.0115	1039.94	94.8684
1040.42	96.6671	1040.42	96.5012	1040.42	96.3624	1040.42	96.2881	1040.42	95.9878	1040.42	94.8287
1040.91	96.6542	1040.91	96.4844	1040.91	96.3426	1040.91	96.2702	1040.91	95.9661	1040.91	94.7911
1041.39	96.6403	1041.39	96.4661	1041.39	96.323	1041.39	96.2526	1041.39	95.9463	1041.39	94.756
1041.87	96.6255	1041.87	96.4473	1041.87	96.3044	1041.87	96.2348	1041.87	95.9283	1041.87	94.7235
1042.35	96.6106	1042.35	96.4292	1042.35	96.2876	1042.35	96.2168	1042.35	95.9116	1042.35	94.6935
1042.84	96.5959	1042.84	96.413	1042.84	96.2732	1042.84	96.1986	1042.84	95.8954	1042.84	94.6659
1043.32	96.5819	1043.32	96.3993	1043.32	96.2612	1043.32	96.1809	1043.32	95.879	1043.32	94.6406
1043.8	96.5692	1043.8	96.3882	1043.8	96.2513	1043.8	96.1643	1043.8	95.8617	1043.8	94.6176
1044.28	96.5583	1044.28	96.3793	1044.28	96.2432	1044.28	96.1497	1044.28	95.8434	1044.28	94.5968
1044.76	96.5498	1044.76	96.372	1044.76	96.2365	1044.76	96.1375	1044.76	95.8241	1044.76	94.5776
1045.25	96.5439	1045.25	96.3654	1045.25	96.2304	1045.25	96.1278	1045.25	95.804	1045.25	94.5596
1045.73	96.5409	1045.73	96.359	1045.73	96.2245	1045.73	96.1196	1045.73	95.7836	1045.73	94.5416
1046.21	96.5406	1046.21	96.3524	1046.21	96.2182	1046.21	96.1119	1046.21	95.7634	1046.21	94.5228
1046.69	96.5425	1046.69	96.3458	1046.69	96.2112	1046.69	96.1038	1046.69	95.7437	1046.69	94.5024
1047.17	96.5458	1047.17	96.3396	1047.17	96.2034	1047.17	96.0945	1047.17	95.7246	1047.17	94.48
1047.66	96.5499	1047.66	96.3347	1047.66	96.1952	1047.66	96.0842	1047.66	95.7065	1047.66	94.4559
1048.14	96.5545	1048.14	96.3319	1048.14	96.1872	1048.14	96.0741	1048.14	95.6892	1048.14	94.4311
1048.62	96.5593	1048.62	96.3319	1048.62	96.1804	1048.62	96.0653	1048.62	95.6731	1048.62	94.4068
1049.1	96.5645	1049.1	96.3351	1049.1	96.1758	1049.1	96.059	1049.1	95.6582	1049.1	94.3839
1049.59	96.57	1049.59	96.3413	1049.59	96.1738	1049.59	96.0557	1049.59	95.6445	1049.59	94.3634
1050.07	96.5758	1050.07	96.3499	1050.07	96.1748	1050.07	96.0552	1050.07	95.6317	1050.07	94.345
1050.55	96.5815	1050.55	96.3595	1050.55	96.1782	1050.55	96.0562	1050.55	95.6195	1050.55	94.3279
1051.03	96.5864	1051.03	96.3686	1051.03	96.183	1051.03	96.0571	1051.03	95.607	1051.03	94.3107
1051.51	96.5897	1051.51	96.3756	1051.51	96.1881	1051.51	96.0562	1051.51	95.593	1051.51	94.2914
1051.99	96.5908	1051.99	96.3789	1051.99	96.192	1051.99	96.052	1051.99	95.5765	1051.99	94.2678
1052.48	96.5896	1052.48	96.3778	1052.48	96.1935	1052.48	96.0439	1052.48	95.5564	1052.48	94.2384
1052.96	96.5863	1052.96	96.372	1052.96	96.192	1052.96	96.0316	1052.96	95.5321	1052.96	94.2019
1053.44	96.5819	1053.44	96.362	1053.44	96.1867	1053.44	96.015	1053.44	95.5032	1053.44	94.1576
1053.92	96.5772	1053.92	96.3489	1053.92	96.1775	1053.92	95.9946	1053.92	95.4698	1053.92	94.1056
1054.41	96.5732	1054.41	96.3338	1054.41	96.1645	1054.41	95.9705	1054.41	95.4321	1054.41	94.0461
1054.89	96.57	1054.89	96.3176	1054.89	96.1475	1054.89	95.9427	1054.89	95.3907	1054.89	93.9799
1055.37	96.5673	1055.37	96.3011	1055.37	96.1267	1055.37	95.9111	1055.37	95.3457	1055.37	93.9073
1055.85	96.5643	1055.85	96.284	1055.85	96.1018	1055.85	95.8755	1055.85	95.2971	1055.85	93.8285
1056.33	96.5597	1056.33	96.2659	1056.33	96.0727	1056.33	95.8355	1056.33	95.2446	1056.33	93.7438
1056.82	96.5524	1056.82	96.2459	1056.82	96.0391	1056.82	95.7909	1056.82	95.1877	1056.82	93.6528
1057.3	96.5415	1057.3	96.2232	1057.3	96.0011	1057.3	95.7416	1057.3	95.126	1057.3	93.5556
1057.78	96.5266	1057.78	96.1973	1057.78	95.9586	1057.78	95.6875	1057.78	95.059	1057.78	93.4523
1058.26	96.5082	1058.26	96.1684	1058.26	95.9122	1058.26	95.6289	1058.26	94.9869	1058.26	93.3433
1058.74	96.487	1058.74	96.1369	1058.74	95.8627	1058.74	95.5664	1058.74	94.9104	1058.74	93.2298
1059.23	96.4642	1059.23	96.1038	1059.23	95.8111	1059.23	95.5013	1059.23	94.8304	1059.23	93.113
1059.71	96.4412	1059.71	96.07	1059.71	95.759	1059.71	95.435	1059.71	94.7485	1059.71	92.9946
1060.19	96.4189	1060.19	96.0362	1060.19	95.7074	1060.19	95.3688	1060.19	94.6663	1060.19	92.8761
1060.67	96.398	1060.67	96.0024	1060.67	95.6573	1060.67	95.3041	1060.67	94.5854	1060.67	92.7585
1061.16	96.3786	1061.16	95.9683	1061.16	95.609	1061.16	95.2414	1061.16	94.5066	1061.16	92.6425
1061.64	96.36	1061.64	95.9329	1061.64	95.5623	1061.64	95.1806	1061.64	94.43	1061.64	92.5277
1062.12	96.3412	1062.12	95.8952	1062.12	95.5162	1062.12	95.1208	1062.12	94.3551	1062.12	92.4134
1062.6	96.3207	1062.6	95.8545	1062.6	95.4696	1062.6	95.0606	1062.6	94.2806	1062.6	92.2986
1063.08	96.2975	1063.08	95.8104	1063.08	95.4217	1063.08	94.9988	1063.08	94.2052	1063.08	92.1828
1063.57	96.2709	1063.57	95.7633	1063.57	95.3719	1063.57	94.9345	1063.57	94.1277	1063.57	92.0657
1064.05	96.2409	1064.05	95.7141	1064.05	95.3202	1064.05	94.8673	1064.05	94.0478	1064.05	91.9483
1064.53	96.2086	1064.53	95.6642	1064.53	95.2672	1064.53	94.7981	1064.53	93.9657	1064.53	91.832
1065.01	96.1752	1065.01	95.6152	1065.01	95.2138	1065.01	94.7279	1065.01	93.8828	1065.01	91.7192
1065.49	96.1423	1065.49	95.5683	1065.49	95.1609	1065.49	94.6586	1065.49	93.8008	1065.49	91.6121
1065.98	96.1112	1065.98	95.5243	1065.98	95.1092	1065.98	94.5917	1065.98	93.7213	1065.98	91.5126
1066.46	96.0826	1066.46	95.4831	1066.46	95.0589	1066.46	94.5286	1066.46	93.6459	1066.46	91.4217
1066.94	96.0563	1066.94	95.4443	1066.94	95.0099	1066.94	94.4702	1066.94	93.5754	1066.94	91.3393
1067.42	96.0316	1067.42	95.4067	1067.42	94.962	1067.42	94.4165	1067.42	93.51	1067.42	91.2646
1067.9	96.0077	1067.9	95.3694	1067.9	94.9151	1067.9	94.3673	1067.9	93.4496	1067.9	91.1963
1068.39	95.9837	1068.39	95.3317	1068.39	94.8695	1068.39	94.3223	1068.39	93.3938	1068.39	91.1329
1068.87	95.9593	1068.87	95.2933	1068.87	94.8257	1068.87	94.281	1068.87	93.3424	1068.87	91.0736
1069.35	95.9344	1069.35	95.2547	1069.35	94.7845	1069.35	94.2431	1069.35	93.2951	1069.35	91.0181
1069.83	95.9097	1069.83	95.2169	1069.83	94.7468	1069.83	94.2088	1069.83	93.2519	1069.83	90.9667
1070.32	95.8858	1070.32	95.1812	1070.32	94.7131	1070.32	94.1782	1070.32	93.2128	1070.32	90.9201
1070.8	95.8635	1070.8	95.1485	1070.8	94.6836	1070.8	94.1514	1070.8	93.1777	1070.8	90.8789
1071.28	95.8432	1071.28	95.1198	1071.28	94.6584	1071.28	94.1287	1071.28	93.1469	1071.28	90.8436
1071.76	95.8252	1071.76	95.0954	1071.76	94.6369	1071.76	94.1099	1071.76	93.1205	1071.76	90.8145
1072.24	95.8097	1072.24	95.0751	1072.24	94.6189	1072.24	94.0945	1072.24	93.0988	1072.24	90.7913
1072.73	95.7966	1072.73	95.0587	1072.73	94.6041	1072.73	94.082	1072.73	93.0825	1072.73	90.7738
1073.21	95.786	1073.21	95.0458	1073.21	94.5924	1073.21	94.0715	1073.21	93.0722	1073.21	90.7617
1073.69	95.778	1073.69	95.036	1073.69	94.5839	1073.69	94.0625	1073.69	93.0683	1073.69	90.7548
1074.17	95.7727	1074.17	95.0294	1074.17	94.5787	1074.17	94.0549	1074.17	93.0709	1074.17	90.7531
1074.65	95.7701	1074.65	95.0261	1074.65	94.5769	1074.65	94.0487	1074.65	93.0794	1074.65	90.7562
1075.14	95.7702	1075.14	95.0261	1075.14	94.5782	1075.14	94.0444	1075.14	93.0926	1075.14	90.7635
1075.62	95.7729	1075.62	95.0293	1075.62	94.5819	1075.62	94.0427	1075.62	93.1087	1075.62	90.7742
1076.1	95.7779	1076.1	95.0351	1076.1	94.5874	1076.1	94.0439	1076.1	93.1261	1076.1	90.787
1076.58	95.785	1076.58	95.0429	1076.58	94.5936	1076.58	94.0484	1076.58	93.1432	1076.58	90.8007
1077.07	95.794	1077.07	95.0516	1077.07	94.5998	1077.07	94.0559	1077.07	93.1588	1077.07	90.8142
1077.55	95.8045	1077.55	95.0605	1077.55	94.6054	1077.55	94.0659	1077.55	93.1725	1077.55	90.827
1078.03	95.8162	1078.03	95.069	1078.03	94.6101	1078.03	94.0778	1078.03	93.1844	1078.03	90.8392
1078.51	95.8288	1078.51	95.0771	1078.51	94.6143	1078.51	94.0908	1078.51	93.195	1078.51	90.8512
1078.99	95.8421	1078.99	95.0851	1078.99	94.6185	1078.99	94.1043	1078.99	93.2049	1078.99	90.8642
1079.48	95.8558	1079.48	95.0938	1079.48	94.6233	1079.48	94.1178	1079.48	93.2147	1079.48	90.8791
1079.96	95.8699	1079.96	95.1036	1079.96	94.6293	1079.96	94.1312	1079.96	93.225	1079.96	90.8966
1080.44	95.8845	1080.44	95.115	1080.44	94.6368	1080.44	94.1444	1080.44	93.2362	1080.44	90.9171
1080.92	95.8996	1080.92	95.1283	1080.92	94.6458	1080.92	94.1573	1080.92	93.2489	1080.92	90.9402
1081.4	95.9158	1081.4	95.1432	1081.4	94.656	1081.4	94.1704	1081.4	93.2637	1081.4	90.9654
1081.89	95.9334	1081.89	95.1594	1081.89	94.667	1081.89	94.1837	1081.89	93.2808	1081.89	90.992
1082.37	95.9528	1082.37	95.1767	1082.37	94.6784	1082.37	94.1979	1082.37	93.3007	1082.37	91.0192
1082.85	95.9743	1082.85	95.1948	1082.85	94.6899	1082.85	94.2133	1082.85	93.3231	1082.85	91.0465
1083.33	95.998	1083.33	95.2137	1083.33	94.7017	1083.33	94.2304	1083.33	93.3478	1083.33	91.0738
1083.82	96.0237	1083.82	95.2334	1083.82	94.7142	1083.82	94.2492	1083.82	93.3741	1083.82	91.1007
1084.3	96.0512	1084.3	95.2541	1084.3	94.7277	1084.3	94.2698	1084.3	93.4012	1084.3	91.1275
1084.78	96.0799	1084.78	95.276	1084.78	94.7427	1084.78	94.2921	1084.78	93.4288	1084.78	91.1543
1085.26	96.1092	1085.26	95.299	1085.26	94.7596	1085.26	94.3155	1085.26	93.4567	1085.26	91.1814
1085.74	96.1384	1085.74	95.323	1085.74	94.7784	1085.74	94.3401	1085.74	93.4856	1085.74	91.209
1086.23	96.1672	1086.23	95.348	1086.23	94.7993	1086.23	94.3658	1086.23	93.5163	1086.23	91.2376
1086.71	96.195	1086.71	95.3737	1086.71	94.8223	1086.71	94.3927	1086.71	93.5497	1086.71	91.2679
1087.19	96.2218	1087.19	95.3999	1087.19	94.8474	1087.19	94.4212	1087.19	93.5864	1087.19	91.3006
1087.67	96.2474	1087.67	95.4264	1087.67	94.8746	1087.67	94.4516	1087.67	93.6265	1087.67	91.3361
1088.15	96.2722	1088.15	95.4532	1088.15	94.9038	1088.15	94.484	1088.15	93.6691	1088.15	91.3747
1088.64	96.2964	1088.64	95.4799	1088.64	94.9344	1088.64	94.5181	1088.64	93.713	1088.64	91.4163
1089.12	96.3201	1089.12	95.5066	1089.12	94.9658	1089.12	94.5533	1089.12	93.7565	1089.12	91.4601
1089.6	96.3437	1089.6	95.5333	1089.6	94.9972	1089.6	94.5889	1089.6	93.7983	1089.6	91.5054
1090.08	96.3675	1090.08	95.5599	1090.08	95.0276	1090.08	94.6241	1090.08	93.8374	1090.08	91.5512
1090.57	96.3918	1090.57	95.5866	1090.57	95.0566	1090.57	94.6585	1090.57	93.8738	1090.57	91.5966
1091.05	96.4167	1091.05	95.6134	1091.05	95.0841	1091.05	94.692	1091.05	93.9079	1091.05	91.6412
1091.53	96.4423	1091.53	95.6406	1091.53	95.1102	1091.53	94.7247	1091.53	93.9406	1091.53	91.6845
1092.01	96.4684	1092.01	95.6677	1092.01	95.1359	1092.01	94.7566	1092.01	93.9726	1092.01	91.7266
1092.49	96.4946	1092.49	95.6948	1092.49	95.1619	1092.49	94.7879	1092.49	94.0043	1092.49	91.7673
1092.98	96.5203	1092.98	95.7212	1092.98	95.1889	1092.98	94.8185	1092.98	94.0357	1092.98	91.8066
1093.46	96.545	1093.46	95.7467	1093.46	95.2172	1093.46	94.8482	1093.46	94.0663	1093.46	91.8444
1093.94	96.5683	1093.94	95.7709	1093.94	95.2465	1093.94	94.8768	1093.94	94.0959	1093.94	91.8808
1094.42	96.5902	1094.42	95.7941	1094.42	95.2766	1094.42	94.9043	1094.42	94.1244	1094.42	91.9161
1094.9	96.611	1094.9	95.8165	1094.9	95.3068	1094.9	94.931	1094.9	94.1522	1094.9	91.9506
1095.39	96.6314	1095.39	95.8389	1095.39	95.3368	1095.39	94.957	1095.39	94.1799	1095.39	91.9852
1095.87	96.6524	1095.87	95.8619	1095.87	95.3663	1095.87	94.9829	1095.87	94.2087	1095.87	92.0204
1096.35	96.6746	1096.35	95.8863	1096.35	95.3956	1096.35	95.009	1096.35	94.2392	1096.35	92.0569
1096.83	96.6982	1096.83	95.9124	1096.83	95.4247	1096.83	95.0353	1096.83	94.2717	1096.83	92.0947
1097.32	96.723	1097.32	95.94	1097.32	95.4539	1097.32	95.0618	1097.32	94.3061	1097.32	92.1335
1097.8	96.7481	1097.8	95.9687	1097.8	95.4831	1097.8	95.0885	1097.8	94.3417	1097.8	92.1727
1098.28	96.7727	1098.28	95.9976	1098.28	95.5121	1098.28	95.1152	1098.28	94.3776	1098.28	92.2116
1098.76	96.7959	1098.76	96.0259	1098.76	95.5405	1098.76	95.1422	1098.76	94.4131	1098.76	92.2496
1099.24	96.8173	1099.24	96.053	1099.24	95.5682	1099.24	95.1697	1099.24	94.4477	1099.24	92.2864
1099.73	96.8372	1099.73	96.0785	1099.73	95.5951	1099.73	95.1981	1099.73	94.4814	1099.73	92.322
1100.21	96.856	1100.21	96.1026	1100.21	95.6212	1100.21	95.2278	1100.21	94.5144	1100.21	92.3568
1100.69	96.8749	1100.69	96.1258	1100.69	95.6468	1100.69	95.2587	1100.69	94.5469	1100.69	92.3913
1101.17	96.8948	1101.17	96.1488	1101.17	95.6723	1101.17	95.2904	1101.17	94.5793	1101.17	92.4259
1101.65	96.9165	1101.65	96.1725	1101.65	95.6981	1101.65	95.3224	1101.65	94.6115	1101.65	92.4609
1102.14	96.9403	1102.14	96.1972	1102.14	95.7245	1102.14	95.3538	1102.14	94.6436	1102.14	92.4962
1102.62	96.9659	1102.62	96.2233	1102.62	95.7513	1102.62	95.3839	1102.62	94.6752	1102.62	92.5316
1103.1	96.9927	1103.1	96.2503	1103.1	95.7783	1103.1	95.4121	1103.1	94.7062	1103.1	92.5669
1103.58	97.0194	1103.58	96.2774	1103.58	95.805	1103.58	95.4379	1103.58	94.736	1103.58	92.6016
1104.07	97.0449	1104.07	96.3036	1104.07	95.8308	1104.07	95.4613	1104.07	94.7643	1104.07	92.635
1104.55	97.0679	1104.55	96.3277	1104.55	95.855	1104.55	95.4825	1104.55	94.7906	1104.55	92.6666
1105.03	97.0873	1105.03	96.3489	1105.03	95.8769	1105.03	95.5019	1105.03	94.8146	1105.03	92.6962
1105.51	97.1029	1105.51	96.3667	1105.51	95.8962	1105.51	95.5199	1105.51	94.836	1105.51	92.7233
1105.99	97.1147	1105.99	96.3813	1105.99	95.9129	1105.99	95.5372	1105.99	94.855	1105.99	92.7483
1106.47	97.1236	1106.47	96.3933	1106.47	95.9274	1106.47	95.5543	1106.47	94.8724	1106.47	92.7716
1106.96	97.1306	1106.96	96.4038	1106.96	95.9409	1106.96	95.5719	1106.96	94.8889	1106.96	92.794
1107.44	97.137	1107.44	96.4138	1107.44	95.9544	1107.44	95.5901	1107.44	94.9058	1107.44	92.8166
1107.92	97.1438	1107.92	96.4246	1107.92	95.969	1107.92	95.6093	1107.92	94.9239	1107.92	92.84
1108.4	97.1514	1108.4	96.4368	1108.4	95.9856	1108.4	95.6289	1108.4	94.9436	1108.4	92.8646
1108.89	97.1596	1108.89	96.4507	1108.89	96.0044	1108.89	95.6488	1108.89	94.9648	1108.89	92.8902
1109.37	97.1678	1109.37	96.4662	1109.37	96.0249	1109.37	95.6684	1109.37	94.9866	1109.37	92.916
1109.85	97.1752	1109.85	96.4829	1109.85	96.0461	1109.85	95.6874	1109.85	95.0079	1109.85	92.941
1110.33	97.1812	1110.33	96.5003	1110.33	96.067	1110.33	95.7055	1110.33	95.0276	1110.33	92.9642
1110.81	97.1858	1110.81	96.518	1110.81	96.0866	1110.81	95.723	1110.81	95.045	1110.81	92.9853
1111.3	97.1895	1111.3	96.5355	1111.3	96.1044	1111.3	95.74	1111.3	95.06	1111.3	93.0043
1111.78	97.1935	1111.78	96.5528	1111.78	96.1205	1111.78	95.7569	1111.78	95.0732	1111.78	93.0219
1112.26	97.1988	1112.26	96.5697	1112.26	96.1353	1112.26	95.7738	1112.26	95.0852	1112.26	93.039
1112.74	97.2061	1112.74	96.5862	1112.74	96.1494	1112.74	95.7907	1112.74	95.0969	1112.74	93.0566
1113.22	97.2159	1113.22	96.6023	1113.22	96.1634	1113.22	95.8073	1113.22	95.1087	1113.22	93.0756
1113.71	97.2274	1113.71	96.6177	1113.71	96.1777	1113.71	95.823	1113.71	95.1208	1113.71	93.0963
1114.19	97.2397	1114.19	96.6321	1114.19	96.1921	1114.19	95.8375	1114.19	95.1331	1114.19	93.1187
1114.67	97.2516	1114.67	96.6455	1114.67	96.2066	1114.67	95.8507	1114.67	95.1456	1114.67	93.1425
1115.15	97.2622	1115.15	96.6577	1115.15	96.2209	1115.15	95.8627	1115.15	95.1583	1115.15	93.1676
1115.64	97.2708	1115.64	96.6691	1115.64	96.2352	1115.64	95.8744	1115.64	95.1716	1115.64	93.194
1116.12	97.2778	1116.12	96.68	1116.12	96.2497	1116.12	95.8866	1116.12	95.1863	1116.12	93.222
1116.6	97.2836	1116.6	96.6914	1116.6	96.2651	1116.6	95.9003	1116.6	95.2032	1116.6	93.2522
1117.08	97.2894	1117.08	96.7042	1117.08	96.2819	1117.08	95.9162	1117.08	95.2231	1117.08	93.2854
1117.56	97.2961	1117.56	96.719	1117.56	96.3004	1117.56	95.9347	1117.56	95.2464	1117.56	93.3221
1118.05	97.3043	1118.05	96.7363	1118.05	96.321	1118.05	95.956	1118.05	95.2729	1118.05	93.3624
1118.53	97.3145	1118.53	96.756	1118.53	96.3435	1118.53	95.9795	1118.53	95.3021	1118.53	93.406
1119.01	97.3263	1119.01	96.7775	1119.01	96.3672	1119.01	96.0046	1119.01	95.3331	1119.01	93.4517
1119.49	97.3393	1119.49	96.7997	1119.49	96.3916	1119.49	96.0308	1119.49	95.3648	1119.49	93.4984
1119.97	97.3527	1119.97	96.8215	1119.97	96.4161	1119.97	96.0573	1119.97	95.3964	1119.97	93.5443
1120.46	97.3658	1120.46	96.8419	1120.46	96.44	1120.46	96.0835	1120.46	95.427	1120.46	93.5881
1120.94	97.378	1120.94	96.8598	1120.94	96.4628	1120.94	96.1091	1120.94	95.4562	1120.94	93.6287
1121.42	97.3889	1121.42	96.8752	1121.42	96.4844	1121.42	96.1336	1121.42	95.4838	1121.42	93.6657
1121.9	97.3986	1121.9	96.8879	1121.9	96.5044	1121.9	96.1566	1121.9	95.5095	1121.9	93.6991
1122.38	97.4072	1122.38	96.8986	1122.38	96.5231	1122.38	96.178	1122.38	95.5334	1122.38	93.7296
1122.87	97.4151	1122.87	96.9081	1122.87	96.5403	1122.87	96.1974	1122.87	95.5554	1122.87	93.758
1123.35	97.4228	1123.35	96.9172	1123.35	96.556	1123.35	96.2148	1123.35	95.5754	1123.35	93.7849
1123.83	97.4306	1123.83	96.9267	1123.83	96.5706	1123.83	96.2301	1123.83	95.5934	1123.83	93.8104
1124.31	97.4386	1124.31	96.9374	1124.31	96.5839	1124.31	96.2436	1124.31	95.6094	1124.31	93.8344
1124.8	97.4467	1124.8	96.9493	1124.8	96.5959	1124.8	96.2555	1124.8	95.6233	1124.8	93.8563
1125.28	97.4548	1125.28	96.9625	1125.28	96.6066	1125.28	96.2662	1125.28	95.6353	1125.28	93.8755
1125.76	97.4626	1125.76	96.9765	1125.76	96.6158	1125.76	96.276	1125.76	95.6454	1125.76	93.8915
1126.24	97.4698	1126.24	96.9909	1126.24	96.6236	1126.24	96.2849	1126.24	95.6539	1126.24	93.9043
1126.72	97.4761	1126.72	97.005	1126.72	96.6301	1126.72	96.2929	1126.72	95.6611	1126.72	93.9144
1127.21	97.4818	1127.21	97.0181	1127.21	96.6356	1127.21	96.3	1127.21	95.6674	1127.21	93.9226
1127.69	97.4868	1127.69	97.0299	1127.69	96.6406	1127.69	96.3063	1127.69	95.6731	1127.69	93.9299
1128.17	97.4914	1128.17	97.0405	1128.17	96.6457	1128.17	96.3118	1128.17	95.6784	1128.17	93.9373
1128.65	97.496	1128.65	97.0499	1128.65	96.6516	1128.65	96.3169	1128.65	95.6837	1128.65	93.9454
1129.13	97.5009	1129.13	97.0586	1129.13	96.6586	1129.13	96.3219	1129.13	95.6887	1129.13	93.9546
1129.62	97.5065	1129.62	97.0669	1129.62	96.6668	1129.62	96.3272	1129.62	95.6938	1129.62	93.9651
1130.1	97.5127	1130.1	97.075	1130.1	96.6761	1130.1	96.333	1130.1	95.6988	1130.1	93.9767
1130.58	97.5194	1130.58	97.0831	1130.58	96.6859	1130.58	96.3393	1130.58	95.7039	1130.58	93.9893
1131.06	97.5263	1131.06	97.0908	1131.06	96.6955	1131.06	96.3459	1131.06	95.7093	1131.06	94.0028
1131.55	97.5328	1131.55	97.0978	1131.55	96.7043	1131.55	96.3526	1131.55	95.7153	1131.55	94.017
1132.03	97.5384	1132.03	97.1041	1132.03	96.7117	1132.03	96.3592	1132.03	95.7222	1132.03	94.0317
1132.51	97.5427	1132.51	97.1095	1132.51	96.7179	1132.51	96.366	1132.51	95.7304	1132.51	94.047
1132.99	97.5455	1132.99	97.1144	1132.99	96.723	1132.99	96.3731	1132.99	95.74	1132.99	94.0628
1133.47	97.5472	1133.47	97.1192	1133.47	96.7275	1133.47	96.3812	1133.47	95.7513	1133.47	94.0795
1133.96	97.5483	1133.96	97.1245	1133.96	96.7323	1133.96	96.3906	1133.96	95.764	1133.96	94.0974
1134.44	97.5496	1134.44	97.1305	1134.44	96.7378	1134.44	96.4015	1134.44	95.7781	1134.44	94.1172
1134.92	97.5517	1134.92	97.1373	1134.92	96.7448	1134.92	96.4138	1134.92	95.7933	1134.92	94.1393
1135.4	97.555	1135.4	97.1445	1135.4	96.7536	1135.4	96.4273	1135.4	95.809	1135.4	94.1642
1135.88	97.5596	1135.88	97.1514	1135.88	96.7641	1135.88	96.4412	1135.88	95.825	1135.88	94.1917
1136.37	97.5652	1136.37	97.1577	1136.37	96.7762	1136.37	96.4554	1136.37	95.8413	1136.37	94.2214
1136.85	97.5711	1136.85	97.1626	1136.85	96.7893	1136.85	96.4695	1136.85	95.8577	1136.85	94.2526
1137.33	97.5767	1137.33	97.1663	1137.33	96.803	1137.33	96.4836	1137.33	95.8749	1137.33	94.2846
1137.81	97.5815	1137.81	97.1689	1137.81	96.8166	1137.81	96.498	1137.81	95.8933	1137.81	94.317
1138.3	97.5853	1138.3	97.1713	1138.3	96.8299	1138.3	96.5131	1138.3	95.9136	1138.3	94.3497
1138.78	97.588	1138.78	97.1741	1138.78	96.8426	1138.78	96.5292	1138.78	95.9364	1138.78	94.3827
1139.26	97.5898	1139.26	97.1781	1139.26	96.8549	1139.26	96.5464	1139.26	95.9621	1139.26	94.4168
1139.74	97.5908	1139.74	97.1839	1139.74	96.8671	1139.74	96.5646	1139.74	95.9905	1139.74	94.4522
1140.22	97.5912	1140.22	97.1915	1140.22	96.8795	1140.22	96.5837	1140.22	96.0213	1140.22	94.4893
1140.71	97.591	1140.71	97.2007	1140.71	96.8924	1140.71	96.6035	1140.71	96.0537	1140.71	94.5278
1141.19	97.5901	1141.19	97.2109	1141.19	96.9059	1141.19	96.6239	1141.19	96.0869	1141.19	94.5676
1141.67	97.5884	1141.67	97.2213	1141.67	96.92	1141.67	96.6446	1141.67	96.12	1141.67	94.6082
1142.15	97.586	1142.15	97.2311	1142.15	96.9344	1142.15	96.6657	1142.15	96.1524	1142.15	94.6492
1142.63	97.5829	1142.63	97.2395	1142.63	96.9487	1142.63	96.6871	1142.63	96.1837	1142.63	94.6907
1143.12	97.5794	1143.12	97.2465	1143.12	96.9627	1143.12	96.7087	1143.12	96.2139	1143.12	94.7329
1143.6	97.5758	1143.6	97.2522	1143.6	96.9763	1143.6	96.7302	1143.6	96.2431	1143.6	94.7762
1144.08	97.5722	1144.08	97.2574	1144.08	96.9896	1144.08	96.7517	1144.08	96.2719	1144.08	94.8211
1144.56	97.569	1144.56	97.2629	1144.56	97.0029	1144.56	96.7734	1144.56	96.3006	1144.56	94.8679
1145.05	97.5662	1145.05	97.2696	1145.05	97.0165	1145.05	96.7957	1145.05	96.3295	1145.05	94.9169
1145.53	97.564	1145.53	97.2783	1145.53	97.0309	1145.53	96.8191	1145.53	96.359	1145.53	94.968
1146.01	97.5623	1146.01	97.2892	1146.01	97.0461	1146.01	96.8439	1146.01	96.3894	1146.01	95.0211
1146.49	97.5611	1146.49	97.3018	1146.49	97.062	1146.49	96.8703	1146.49	96.4206	1146.49	95.076
1146.97	97.5604	1146.97	97.3155	1146.97	97.0787	1146.97	96.8982	1146.97	96.4527	1146.97	95.1325
1147.46	97.5601	1147.46	97.3294	1147.46	97.0958	1147.46	96.927	1147.46	96.4856	1147.46	95.1904
1147.94	97.5604	1147.94	97.3426	1147.94	97.1134	1147.94	96.956	1147.94	96.5194	1147.94	95.2497
1148.42	97.5614	1148.42	97.3549	1148.42	97.1313	1148.42	96.9848	1148.42	96.554	1148.42	95.3098
1148.9	97.5633	1148.9	97.3662	1148.9	97.1497	1148.9	97.013	1148.9	96.5897	1148.9	95.3707
1149.38	97.5663	1149.38	97.3769	1149.38	97.1687	1149.38	97.0406	1149.38	96.6266	1149.38	95.4317
1149.87	97.5708	1149.87	97.3875	1149.87	97.1882	1149.87	97.0682	1149.87	96.6648	1149.87	95.4926
1150.35	97.5766	1150.35	97.3987	1150.35	97.2081	1150.35	97.096	1150.35	96.7041	1150.35	95.553
1150.83	97.5835	1150.83	97.4106	1150.83	97.2281	1150.83	97.1245	1150.83	96.7445	1150.83	95.6128
1151.31	97.591	1151.31	97.4234	1151.31	97.2477	1151.31	97.1538	1151.31	96.7854	1151.31	95.672
1151.8	97.5985	1151.8	97.4368	1151.8	97.2666	1151.8	97.1836	1151.8	96.8261	1151.8	95.7307
1152.28	97.6057	1152.28	97.4507	1152.28	97.2847	1152.28	97.2135	1152.28	96.866	1152.28	95.7893
1152.76	97.6124	1152.76	97.465	1152.76	97.3023	1152.76	97.2433	1152.76	96.9046	1152.76	95.8483
1153.24	97.6187	1153.24	97.4799	1153.24	97.3196	1153.24	97.2725	1153.24	96.9419	1153.24	95.9083
1153.72	97.6252	1153.72	97.4954	1153.72	97.3375	1153.72	97.3012	1153.72	96.9781	1153.72	95.9696
1154.21	97.6322	1154.21	97.5118	1154.21	97.3563	1154.21	97.3295	1154.21	97.0137	1154.21	96.0327
1154.69	97.6405	1154.69	97.5293	1154.69	97.3766	1154.69	97.3578	1154.69	97.0494	1154.69	96.0974
1155.17	97.6498	1155.17	97.5474	1155.17	97.3983	1155.17	97.386	1155.17	97.0857	1155.17	96.1633
1155.65	97.66	1155.65	97.5657	1155.65	97.4212	1155.65	97.4142	1155.65	97.1227	1155.65	96.2297
1156.13	97.6704	1156.13	97.5837	1156.13	97.4449	1156.13	97.4421	1156.13	97.1602	1156.13	96.2954
1156.62	97.6801	1156.62	97.6006	1156.62	97.4687	1156.62	97.4692	1156.62	97.1975	1156.62	96.3592
1157.1	97.6884	1157.1	97.6158	1157.1	97.4921	1157.1	97.4951	1157.1	97.2339	1157.1	96.42
1157.58	97.695	1157.58	97.6291	1157.58	97.5146	1157.58	97.5194	1157.58	97.2685	1157.58	96.4772
1158.06	97.6999	1158.06	97.6406	1158.06	97.5359	1158.06	97.5418	1158.06	97.3007	1158.06	96.5307
1158.55	97.7033	1158.55	97.6507	1158.55	97.5559	1158.55	97.5626	1158.55	97.3304	1158.55	96.5805
1159.03	97.7057	1159.03	97.6598	1159.03	97.5746	1159.03	97.5817	1159.03	97.3577	1159.03	96.6272
1159.51	97.7076	1159.51	97.6687	1159.51	97.5918	1159.51	97.5995	1159.51	97.3833	1159.51	96.6713
1159.99	97.7094	1159.99	97.6779	1159.99	97.6079	1159.99	97.6163	1159.99	97.4076	1159.99	96.7134
1160.47	97.7114	1160.47	97.6879	1160.47	97.6227	1160.47	97.6325	1160.47	97.4315	1160.47	96.7536
1160.95	97.7138	1160.95	97.6989	1160.95	97.6365	1160.95	97.6483	1160.95	97.4553	1160.95	96.7921
1161.44	97.7168	1161.44	97.7106	1161.44	97.6493	1161.44	97.6638	1161.44	97.4791	1161.44	96.8289
1161.92	97.7206	1161.92	97.7228	1161.92	97.6611	1161.92	97.6791	1161.92	97.5028	1161.92	96.8641
1162.4	97.7256	1162.4	97.7347	1162.4	97.6719	1162.4	97.6943	1162.4	97.526	1162.4	96.8978
1162.88	97.7316	1162.88	97.7458	1162.88	97.6819	1162.88	97.7092	1162.88	97.5482	1162.88	96.9303
1163.37	97.7386	1163.37	97.7556	1163.37	97.6911	1163.37	97.7239	1163.37	97.569	1163.37	96.9617
1163.85	97.7465	1163.85	97.7638	1163.85	97.6997	1163.85	97.7382	1163.85	97.5881	1163.85	96.9923
1164.33	97.755	1164.33	97.7707	1164.33	97.7081	1164.33	97.7522	1164.33	97.6057	1164.33	97.0219
1164.81	97.764	1164.81	97.7764	1164.81	97.7165	1164.81	97.7661	1164.81	97.6221	1164.81	97.0505
1165.3	97.7733	1165.3	97.7817	1165.3	97.7254	1165.3	97.7798	1165.3	97.6378	1165.3	97.0779
1165.78	97.7828	1165.78	97.7871	1165.78	97.7349	1165.78	97.7934	1165.78	97.6531	1165.78	97.1037
1166.26	97.7923	1166.26	97.793	1166.26	97.745	1166.26	97.8066	1166.26	97.6683	1166.26	97.1277
1166.74	97.8013	1166.74	97.7992	1166.74	97.7555	1166.74	97.8191	1166.74	97.6831	1166.74	97.1499
1167.22	97.8095	1167.22	97.8057	1167.22	97.7658	1167.22	97.8302	1167.22	97.6972	1167.22	97.1699
1167.7	97.8159	1167.7	97.8119	1167.7	97.7754	1167.7	97.8394	1167.7	97.7098	1167.7	97.1876
1168.19	97.82	1168.19	97.817	1168.19	97.7837	1168.19	97.8464	1168.19	97.7203	1168.19	97.2027
1168.67	97.8214	1168.67	97.8209	1168.67	97.7902	1168.67	97.8509	1168.67	97.7283	1168.67	97.2149
1169.15	97.8202	1169.15	97.823	1169.15	97.7949	1169.15	97.8533	1169.15	97.7337	1169.15	97.2241
1169.63	97.8171	1169.63	97.8235	1169.63	97.7977	1169.63	97.8544	1169.63	97.737	1169.63	97.2305
1170.12	97.8131	1170.12	97.8227	1170.12	97.7989	1170.12	97.8549	1170.12	97.7388	1170.12	97.2345
1170.6	97.8091	1170.6	97.8213	1170.6	97.7987	1170.6	97.8557	1170.6	97.7402	1170.6	97.2368
1171.08	97.8061	1171.08	97.8197	1171.08	97.7975	1171.08	97.8574	1171.08	97.742	1171.08	97.2385
1171.56	97.8047	1171.56	97.8185	1171.56	97.7955	1171.56	97.8602	1171.56	97.7447	1171.56	97.2401
1172.04	97.805	1172.04	97.818	1172.04	97.7931	1172.04	97.8637	1172.04	97.7485	1172.04	97.2421
1172.53	97.8066	1172.53	97.8182	1172.53	97.7903	1172.53	97.8676	1172.53	97.7532	1172.53	97.2445
1173.01	97.8091	1173.01	97.8188	1173.01	97.7873	1173.01	97.8711	1173.01	97.7581	1173.01	97.2468
1173.49	97.812	1173.49	97.8194	1173.49	97.784	1173.49	97.8736	1173.49	97.7624	1173.49	97.2479
1173.97	97.8145	1173.97	97.8193	1173.97	97.7801	1173.97	97.8746	1173.97	97.7652	1173.97	97.2468
1174.45	97.8162	1174.45	97.8179	1174.45	97.7754	1174.45	97.8736	1174.45	97.766	1174.45	97.2424
1174.94	97.8164	1174.94	97.8148	1174.94	97.7695	1174.94	97.8706	1174.94	97.7641	1174.94	97.2339
1175.42	97.8147	1175.42	97.81	1175.42	97.7618	1175.42	97.8654	1175.42	97.7593	1175.42	97.2211
1175.9	97.8109	1175.9	97.8038	1175.9	97.7522	1175.9	97.8582	1175.9	97.7518	1175.9	97.2043
1176.38	97.8051	1176.38	97.7968	1176.38	97.741	1176.38	97.8491	1176.38	97.7418	1176.38	97.1841
1176.87	97.7978	1176.87	97.7897	1176.87	97.7285	1176.87	97.8384	1176.87	97.7298	1176.87	97.1618
1177.35	97.79	1177.35	97.7833	1177.35	97.7158	1177.35	97.8269	1177.35	97.7163	1177.35	97.1385
1177.83	97.7827	1177.83	97.778	1177.83	97.7036	1177.83	97.815	1177.83	97.702	1177.83	97.1152
1178.31	97.7771	1178.31	97.7738	1178.31	97.6928	1178.31	97.8034	1178.31	97.6874	1178.31	97.0925
1178.79	97.7741	1178.79	97.7702	1178.79	97.6839	1178.79	97.7925	1178.79	97.673	1178.79	97.0708
1179.28	97.7737	1179.28	97.7666	1179.28	97.6768	1179.28	97.7823	1179.28	97.659	1179.28	97.0496
1179.76	97.7755	1179.76	97.7622	1179.76	97.6713	1179.76	97.7728	1179.76	97.6457	1179.76	97.0283
1180.24	97.7785	1180.24	97.7565	1180.24	97.6666	1180.24	97.7633	1180.24	97.6329	1180.24	97.0061
1180.72	97.7815	1180.72	97.7492	1180.72	97.6621	1180.72	97.7534	1180.72	97.6207	1180.72	96.9823
1181.2	97.7834	1181.2	97.7406	1181.2	97.6572	1181.2	97.7429	1181.2	97.6089	1181.2	96.9567
1181.69	97.7837	1181.69	97.7313	1181.69	97.6514	1181.69	97.7317	1181.69	97.5974	1181.69	96.9291
1182.17	97.782	1182.17	97.7221	1182.17	97.6448	1182.17	97.7202	1182.17	97.5861	1182.17	96.8999
1182.65	97.7786	1182.65	97.7139	1182.65	97.6373	1182.65	97.709	1182.65	97.5749	1182.65	96.8696
1183.13	97.7743	1183.13	97.707	1183.13	97.6293	1183.13	97.699	1183.13	97.5637	1183.13	96.8389
1183.62	97.7697	1183.62	97.702	1183.62	97.6213	1183.62	97.6907	1183.62	97.5525	1183.62	96.8081
1184.1	97.7656	1184.1	97.6988	1184.1	97.6137	1184.1	97.6845	1184.1	97.5414	1184.1	96.7774
1184.58	97.7627	1184.58	97.6971	1184.58	97.6073	1184.58	97.6802	1184.58	97.5303	1184.58	96.7468
1185.06	97.7615	1185.06	97.6967	1185.06	97.6024	1185.06	97.6773	1185.06	97.5194	1185.06	96.7162
1185.54	97.7619	1185.54	97.6972	1185.54	97.5991	1185.54	97.675	1185.54	97.5085	1185.54	96.6854
1186.03	97.7642	1186.03	97.698	1186.03	97.5975	1186.03	97.6722	1186.03	97.4976	1186.03	96.6541
1186.51	97.7677	1186.51	97.6988	1186.51	97.5969	1186.51	97.6683	1186.51	97.4865	1186.51	96.6221
1186.99	97.772	1186.99	97.6987	1186.99	97.5964	1186.99	97.6625	1186.99	97.475	1186.99	96.5891
1187.47	97.7763	1187.47	97.6975	1187.47	97.595	1187.47	97.6548	1187.47	97.4626	1187.47	96.5551
1187.95	97.7801	1187.95	97.6948	1187.95	97.5918	1187.95	97.6451	1187.95	97.4494	1187.95	96.5201
1188.44	97.783	1188.44	97.6906	1188.44	97.5864	1188.44	97.6339	1188.44	97.4353	1188.44	96.4841
1188.92	97.7848	1188.92	97.6851	1188.92	97.579	1188.92	97.622	1188.92	97.4205	1188.92	96.4476
1189.4	97.7858	1189.4	97.6791	1189.4	97.5702	1189.4	97.61	1189.4	97.4054	1189.4	96.4109
1189.88	97.7866	1189.88	97.6731	1189.88	97.5608	1189.88	97.5986	1189.88	97.3904	1189.88	96.3749
1190.37	97.7875	1190.37	97.668	1190.37	97.5519	1190.37	97.5884	1190.37	97.3756	1190.37	96.3399
1190.85	97.7892	1190.85	97.6643	1190.85	97.5441	1190.85	97.5796	1190.85	97.3613	1190.85	96.3066
1191.33	97.7917	1191.33	97.6622	1191.33	97.5377	1191.33	97.5723	1191.33	97.3475	1191.33	96.2751
1191.81	97.7954	1191.81	97.6615	1191.81	97.5326	1191.81	97.5663	1191.81	97.3342	1191.81	96.2456
1192.29	97.8003	1192.29	97.6618	1192.29	97.5286	1192.29	97.5614	1192.29	97.3214	1192.29	96.2181
1192.78	97.8066	1192.78	97.6629	1192.78	97.5253	1192.78	97.5572	1192.78	97.3094	1192.78	96.1927
1193.26	97.8143	1193.26	97.6646	1193.26	97.5225	1193.26	97.5536	1193.26	97.2983	1193.26	96.1693
1193.74	97.8236	1193.74	97.6666	1193.74	97.5201	1193.74	97.55	1193.74	97.2884	1193.74	96.1478
1194.22	97.8343	1194.22	97.6693	1194.22	97.5181	1194.22	97.5461	1194.22	97.2798	1194.22	96.1283
1194.7	97.8458	1194.7	97.6723	1194.7	97.5162	1194.7	97.5413	1194.7	97.2721	1194.7	96.1102
1195.19	97.8574	1195.19	97.6756	1195.19	97.5143	1195.19	97.535	1195.19	97.2647	1195.19	96.0929
1195.67	97.8682	1195.67	97.6786	1195.67	97.5118	1195.67	97.5267	1195.67	97.2565	1195.67	96.0756
1196.15	97.8773	1196.15	97.6804	1196.15	97.5079	1196.15	97.5159	1196.15	97.2466	1196.15	96.0571
1196.63	97.8839	1196.63	97.6802	1196.63	97.5023	1196.63	97.5026	1196.63	97.234	1196.63	96.0366
1197.12	97.8881	1197.12	97.6773	1197.12	97.4945	1197.12	97.4871	1197.12	97.2181	1197.12	96.0136
1197.6	97.8901	1197.6	97.6715	1197.6	97.4845	1197.6	97.47	1197.6	97.199	1197.6	95.9881
1198.08	97.8902	1198.08	97.6629	1198.08	97.4726	1198.08	97.4518	1198.08	97.1769	1198.08	95.9604
1198.56	97.889	1198.56	97.6524	1198.56	97.459	1198.56	97.4332	1198.56	97.1527	1198.56	95.9314
1199.04	97.8866	1199.04	97.6405	1199.04	97.4443	1199.04	97.4142	1199.04	97.127	1199.04	95.902
1199.53	97.8832	1199.53	97.6281	1199.53	97.4287	1199.53	97.3948	1199.53	97.1008	1199.53	95.8727
1200.01	97.8783	1200.01	97.6155	1200.01	97.4124	1200.01	97.3744	1200.01	97.0742	1200.01	95.8443
1200.49	97.8722	1200.49	97.6031	1200.49	97.3956	1200.49	97.3527	1200.49	97.0477	1200.49	95.8168
1200.97	97.8649	1200.97	97.5905	1200.97	97.3786	1200.97	97.3294	1200.97	97.0212	1200.97	95.7904
1201.45	97.8572	1201.45	97.5776	1201.45	97.3613	1201.45	97.3045	1201.45	96.9947	1201.45	95.7652
1201.94	97.8499	1201.94	97.5643	1201.94	97.3441	1201.94	97.2785	1201.94	96.9679	1201.94	95.7412
1202.42	97.8438	1202.42	97.5505	1202.42	97.3269	1202.42	97.2521	1202.42	96.9409	1202.42	95.7185
1202.9	97.8397	1202.9	97.5363	1202.9	97.3096	1202.9	97.2258	1202.9	96.9134	1202.9	95.6974
1203.38	97.8374	1203.38	97.5219	1203.38	97.2916	1203.38	97.2002	1203.38	96.8855	1203.38	95.6777
1203.87	97.8367	1203.87	97.5073	1203.87	97.2726	1203.87	97.1753	1203.87	96.8571	1203.87	95.6597
1204.35	97.8366	1204.35	97.4926	1204.35	97.2522	1204.35	97.1512	1204.35	96.8284	1204.35	95.6433
1204.83	97.8362	1204.83	97.4777	1204.83	97.2302	1204.83	97.1275	1204.83	96.7993	1204.83	95.6283
1205.31	97.8348	1205.31	97.4627	1205.31	97.2069	1205.31	97.1045	1205.31	96.7702	1205.31	95.6148
1205.79	97.8319	1205.79	97.4479	1205.79	97.1829	1205.79	97.0821	1205.79	96.7414	1205.79	95.603
1206.28	97.8275	1206.28	97.4334	1206.28	97.1592	1206.28	97.061	1206.28	96.7138	1206.28	95.593
1206.76	97.8222	1206.76	97.4198	1206.76	97.1368	1206.76	97.0414	1206.76	96.6877	1206.76	95.5851
1207.24	97.8163	1207.24	97.4073	1207.24	97.1163	1207.24	97.0237	1207.24	96.6639	1207.24	95.5799
1207.72	97.8104	1207.72	97.3961	1207.72	97.0983	1207.72	97.0081	1207.72	96.6429	1207.72	95.5774
1208.2	97.8048	1208.2	97.3862	1208.2	97.0832	1208.2	96.9944	1208.2	96.625	1208.2	95.5781
1208.69	97.7999	1208.69	97.3772	1208.69	97.0707	1208.69	96.9823	1208.69	96.6102	1208.69	95.5819
1209.17	97.7957	1209.17	97.3687	1209.17	97.0606	1209.17	96.9717	1209.17	96.5985	1209.17	95.5889
1209.65	97.7921	1209.65	97.3601	1209.65	97.0525	1209.65	96.9623	1209.65	96.5893	1209.65	95.599
1210.13	97.7891	1210.13	97.3514	1210.13	97.0459	1210.13	96.9543	1210.13	96.5824	1210.13	95.612
1210.61	97.7864	1210.61	97.3424	1210.61	97.04	1210.61	96.9477	1210.61	96.5772	1210.61	95.6278
1211.1	97.7839	1211.1	97.3335	1211.1	97.0344	1211.1	96.9427	1211.1	96.5736	1211.1	95.646
1211.58	97.7814	1211.58	97.3251	1211.58	97.0286	1211.58	96.9391	1211.58	96.5714	1211.58	95.6664
1212.06	97.7785	1212.06	97.3178	1212.06	97.0223	1212.06	96.9369	1212.06	96.5708	1212.06	95.689
1212.54	97.7754	1212.54	97.312	1212.54	97.0157	1212.54	96.9358	1212.54	96.5721	1212.54	95.7137
1213.03	97.7722	1213.03	97.3079	1213.03	97.0095	1213.03	96.9358	1213.03	96.576	1213.03	95.7408
1213.51	97.7693	1213.51	97.3058	1213.51	97.0045	1213.51	96.9372	1213.51	96.5827	1213.51	95.7707
1213.99	97.7671	1213.99	97.3057	1213.99	97.0018	1213.99	96.9402	1213.99	96.5928	1213.99	95.8037
1214.47	97.7657	1214.47	97.3075	1214.47	97.0021	1214.47	96.9456	1214.47	96.6064	1214.47	95.8401
1214.95	97.7653	1214.95	97.3112	1214.95	97.0059	1214.95	96.9536	1214.95	96.6233	1214.95	95.8801
1215.43	97.7656	1215.43	97.3166	1215.43	97.0132	1215.43	96.9645	1215.43	96.6434	1215.43	95.9232
1215.92	97.7663	1215.92	97.3234	1215.92	97.0235	1215.92	96.978	1215.92	96.6663	1215.92	95.969
1216.4	97.7669	1216.4	97.3315	1216.4	97.0361	1216.4	96.9937	1216.4	96.6915	1216.4	96.017
1216.88	97.7675	1216.88	97.3404	1216.88	97.0502	1216.88	97.0109	1216.88	96.7185	1216.88	96.0666
1217.36	97.7681	1217.36	97.35	1217.36	97.0653	1217.36	97.0293	1217.36	96.7471	1217.36	96.1176
1217.85	97.7693	1217.85	97.3603	1217.85	97.0813	1217.85	97.0489	1217.85	96.7769	1217.85	96.1699
1218.33	97.7715	1218.33	97.3714	1218.33	97.0984	1218.33	97.0698	1218.33	96.808	1218.33	96.2235
1218.81	97.7753	1218.81	97.3834	1218.81	97.1168	1218.81	97.0926	1218.81	96.8403	1218.81	96.2785
1219.29	97.7809	1219.29	97.3966	1219.29	97.1369	1219.29	97.1177	1219.29	96.8739	1219.29	96.3351
1219.78	97.7881	1219.78	97.4112	1219.78	97.1588	1219.78	97.1452	1219.78	96.9087	1219.78	96.3931
1220.26	97.7965	1220.26	97.4269	1220.26	97.1823	1220.26	97.175	1220.26	96.9449	1220.26	96.452
1220.74	97.8055	1220.74	97.4436	1220.74	97.2072	1220.74	97.2063	1220.74	96.9822	1220.74	96.5114
1221.22	97.8146	1221.22	97.4608	1221.22	97.2328	1221.22	97.2383	1221.22	97.0205	1221.22	96.571
1221.7	97.8233	1221.7	97.4781	1221.7	97.2586	1221.7	97.27	1221.7	97.0594	1221.7	96.6302
1222.18	97.8315	1222.18	97.495	1222.18	97.2843	1222.18	97.3008	1222.18	97.0986	1222.18	96.6889
1222.67	97.8391	1222.67	97.5114	1222.67	97.3093	1222.67	97.3303	1222.67	97.1377	1222.67	96.7469
1223.15	97.8461	1223.15	97.5272	1223.15	97.3334	1223.15	97.3587	1223.15	97.1764	1223.15	96.8042
1223.63	97.8525	1223.63	97.5428	1223.63	97.3567	1223.63	97.3863	1223.63	97.2147	1223.63	96.8609
1224.11	97.8586	1224.11	97.5586	1224.11	97.3792	1224.11	97.4138	1224.11	97.2527	1224.11	96.9168
1224.6	97.8647	1224.6	97.5748	1224.6	97.4012	1224.6	97.442	1224.6	97.2907	1224.6	96.9721
1225.08	97.8709	1225.08	97.5918	1225.08	97.4232	1225.08	97.4713	1225.08	97.3291	1225.08	97.0269
1225.56	97.8776	1225.56	97.6095	1225.56	97.4455	1225.56	97.5022	1225.56	97.3683	1225.56	97.0814
1226.04	97.8851	1226.04	97.6277	1226.04	97.4685	1226.04	97.5346	1226.04	97.4082	1226.04	97.1354
1226.52	97.8934	1226.52	97.6461	1226.52	97.4925	1226.52	97.5681	1226.52	97.4484	1226.52	97.1886
1227.01	97.9025	1227.01	97.6642	1227.01	97.5173	1227.01	97.6019	1227.01	97.4884	1227.01	97.2408
1227.49	97.9119	1227.49	97.6818	1227.49	97.5424	1227.49	97.635	1227.49	97.5274	1227.49	97.291
1227.97	97.9213	1227.97	97.6986	1227.97	97.5674	1227.97	97.6665	1227.97	97.5646	1227.97	97.3383
1228.45	97.9299	1228.45	97.7149	1228.45	97.5915	1228.45	97.6957	1228.45	97.5995	1228.45	97.382
1228.93	97.9376	1228.93	97.7308	1228.93	97.6145	1228.93	97.7223	1228.93	97.6322	1228.93	97.4215
1229.42	97.9441	1229.42	97.7467	1229.42	97.6362	1229.42	97.7467	1229.42	97.6629	1229.42	97.4568
1229.9	97.9495	1229.9	97.7627	1229.9	97.6568	1229.9	97.7694	1229.9	97.692	1229.9	97.488
1230.38	97.9541	1230.38	97.779	1230.38	97.6766	1230.38	97.7912	1230.38	97.7204	1230.38	97.5159
1230.86	97.9585	1230.86	97.7954	1230.86	97.696	1230.86	97.8129	1230.86	97.7483	1230.86	97.5414
1231.35	97.9628	1231.35	97.8116	1231.35	97.7152	1231.35	97.8349	1231.35	97.776	1231.35	97.5652
1231.83	97.9673	1231.83	97.8275	1231.83	97.7345	1231.83	97.857	1231.83	97.8033	1231.83	97.5881
1232.31	97.9721	1232.31	97.8427	1232.31	97.7536	1232.31	97.8789	1232.31	97.8299	1232.31	97.6103
1232.79	97.9772	1232.79	97.8572	1232.79	97.7723	1232.79	97.9002	1232.79	97.8553	1232.79	97.6319
1233.27	97.9826	1233.27	97.871	1233.27	97.7904	1233.27	97.9202	1233.27	97.8791	1233.27	97.6525
1233.76	97.9883	1233.76	97.8841	1233.76	97.8076	1233.76	97.9386	1233.76	97.9007	1233.76	97.6718
1234.24	97.9942	1234.24	97.8964	1234.24	97.8236	1234.24	97.9555	1234.24	97.9197	1234.24	97.6892
1234.72	98.0002	1234.72	97.9078	1234.72	97.8384	1234.72	97.9708	1234.72	97.9359	1234.72	97.7041
1235.2	98.006	1235.2	97.9181	1235.2	97.8517	1235.2	97.9849	1235.2	97.9492	1235.2	97.7163
1235.68	98.0116	1235.68	97.927	1235.68	97.8635	1235.68	97.9977	1235.68	97.9596	1235.68	97.7254
1236.17	98.0166	1236.17	97.9345	1236.17	97.8737	1236.17	98.0094	1236.17	97.9676	1236.17	97.7316
1236.65	98.0208	1236.65	97.9406	1236.65	97.8822	1236.65	98.0199	1236.65	97.9738	1236.65	97.7352
1237.13	98.0242	1237.13	97.9455	1237.13	97.8892	1237.13	98.0292	1237.13	97.9791	1237.13	97.7368
1237.61	98.0269	1237.61	97.9496	1237.61	97.8947	1237.61	98.0373	1237.61	97.9841	1237.61	97.7373
1238.1	98.0289	1238.1	97.953	1238.1	97.8991	1238.1	98.0444	1238.1	97.9895	1238.1	97.7372
1238.58	98.0305	1238.58	97.9557	1238.58	97.9027	1238.58	98.0507	1238.58	97.9954	1238.58	97.737
1239.06	98.0317	1239.06	97.9579	1239.06	97.9057	1239.06	98.0563	1239.06	98.0017	1239.06	97.7371
1239.54	98.0327	1239.54	97.9595	1239.54	97.9085	1239.54	98.0615	1239.54	98.008	1239.54	97.737
1240.02	98.0334	1240.02	97.9604	1240.02	97.9113	1240.02	98.0663	1240.02	98.0139	1240.02	97.7367
1240.51	98.034	1240.51	97.9609	1240.51	97.9141	1240.51	98.0708	1240.51	98.0191	1240.51	97.7356
1240.99	98.0347	1240.99	97.9616	1240.99	97.9171	1240.99	98.075	1240.99	98.0235	1240.99	97.7334
1241.47	98.0355	1241.47	97.9628	1241.47	97.9202	1241.47	98.0789	1241.47	98.0273	1241.47	97.7301
1241.95	98.0367	1241.95	97.9652	1241.95	97.9234	1241.95	98.0827	1241.95	98.0309	1241.95	97.7255
1242.43	98.0383	1242.43	97.9687	1242.43	97.9264	1242.43	98.0861	1242.43	98.0345	1242.43	97.7198
1242.92	98.0403	1242.92	97.9733	1242.92	97.9288	1242.92	98.0891	1242.92	98.0383	1242.92	97.713
1243.4	98.0423	1243.4	97.9783	1243.4	97.9304	1243.4	98.0911	1243.4	98.042	1243.4	97.7051
1243.88	98.0442	1243.88	97.9831	1243.88	97.9309	1243.88	98.0919	1243.88	98.0451	1243.88	97.6963
1244.36	98.0456	1244.36	97.9871	1244.36	97.93	1244.36	98.0912	1244.36	98.0468	1244.36	97.6867
1244.85	98.0465	1244.85	97.9899	1244.85	97.9281	1244.85	98.0891	1244.85	98.0467	1244.85	97.6766
1245.33	98.047	1245.33	97.9916	1245.33	97.9255	1245.33	98.0859	1245.33	98.0447	1245.33	97.6667
1245.81	98.0475	1245.81	97.9924	1245.81	97.9229	1245.81	98.0826	1245.81	98.0409	1245.81	97.6574
1246.29	98.0483	1246.29	97.9926	1246.29	97.9209	1246.29	98.08	1246.29	98.0359	1246.29	97.6495
1246.77	98.0499	1246.77	97.9926	1246.77	97.9201	1246.77	98.0789	1246.77	98.0304	1246.77	97.6431
1247.26	98.0524	1247.26	97.9925	1247.26	97.9209	1247.26	98.0794	1247.26	98.0253	1247.26	97.6382
1247.74	98.0556	1247.74	97.9924	1247.74	97.9233	1247.74	98.0816	1247.74	98.0209	1247.74	97.6342
1248.22	98.0594	1248.22	97.9922	1248.22	97.9269	1248.22	98.0847	1248.22	98.0178	1248.22	97.6306
1248.7	98.0633	1248.7	97.9921	1248.7	97.9313	1248.7	98.088	1248.7	98.0159	1248.7	97.6268
1249.18	98.0668	1249.18	97.9924	1249.18	97.9359	1249.18	98.0909	1249.18	98.0151	1249.18	97.6226
1249.67	98.0697	1249.67	97.9932	1249.67	97.9402	1249.67	98.0929	1249.67	98.0153	1249.67	97.6182
1250.15	98.0718	1250.15	97.995	1250.15	97.944	1250.15	98.094	1250.15	98.0165	1250.15	97.6142
1250.63	98.0731	1250.63	97.9978	1250.63	97.947	1250.63	98.0945	1250.63	98.0183	1250.63	97.6112
1251.11	98.0737	1251.11	98.0013	1251.11	97.9493	1251.11	98.0946	1251.11	98.0208	1251.11	97.6099
1251.6	98.0737	1251.6	98.0052	1251.6	97.9509	1251.6	98.0947	1251.6	98.024	1251.6	97.6105
1252.08	98.0733	1252.08	98.009	1252.08	97.952	1252.08	98.095	1252.08	98.0277	1252.08	97.6129
1252.56	98.0726	1252.56	98.0122	1252.56	97.9527	1252.56	98.0956	1252.56	98.032	1252.56	97.6167
1253.04	98.0718	1253.04	98.0147	1253.04	97.9531	1253.04	98.0964	1253.04	98.0369	1253.04	97.6215
1253.52	98.0712	1253.52	98.0165	1253.52	97.9534	1253.52	98.0975	1253.52	98.0422	1253.52	97.627
1254.01	98.071	1254.01	98.0178	1254.01	97.9539	1254.01	98.0991	1254.01	98.048	1254.01	97.633
1254.49	98.0713	1254.49	98.019	1254.49	97.9549	1254.49	98.1014	1254.49	98.054	1254.49	97.6397
1254.97	98.072	1254.97	98.0202	1254.97	97.9566	1254.97	98.1047	1254.97	98.0601	1254.97	97.6475
1255.45	98.073	1255.45	98.0213	1255.45	97.9592	1255.45	98.1089	1255.45	98.0662	1255.45	97.6567
1255.93	98.074	1255.93	98.0223	1255.93	97.9629	1255.93	98.1141	1255.93	98.0722	1255.93	97.6675
1256.42	98.0748	1256.42	98.023	1256.42	97.9677	1256.42	98.1199	1256.42	98.0781	1256.42	97.6798
1256.9	98.0751	1256.9	98.0237	1256.9	97.9734	1256.9	98.1262	1256.9	98.084	1256.9	97.6933
1257.38	98.075	1257.38	98.0244	1257.38	97.98	1257.38	98.1329	1257.38	98.0902	1257.38	97.7079
1257.86	98.0745	1257.86	98.0258	1257.86	97.9872	1257.86	98.1399	1257.86	98.0973	1257.86	97.7234
1258.34	98.0742	1258.34	98.0283	1258.34	97.995	1258.34	98.1479	1258.34	98.1057	1258.34	97.7397
1258.83	98.0744	1258.83	98.0323	1258.83	98.0033	1258.83	98.1572	1258.83	98.1159	1258.83	97.7571
1259.31	98.0756	1259.31	98.038	1259.31	98.0122	1259.31	98.1683	1259.31	98.1283	1259.31	97.7757
1259.79	98.0783	1259.79	98.0457	1259.79	98.0221	1259.79	98.1817	1259.79	98.1433	1259.79	97.7955
1260.27	98.0832	1260.27	98.0553	1260.27	98.0334	1260.27	98.1973	1260.27	98.161	1260.27	97.8165
1260.76	98.0909	1260.76	98.067	1260.76	98.0467	1260.76	98.2151	1260.76	98.1815	1260.76	97.8383
1261.24	98.102	1261.24	98.0809	1261.24	98.0624	1261.24	98.2347	1261.24	98.2046	1261.24	97.8604
1261.72	98.1167	1261.72	98.0975	1261.72	98.0807	1261.72	98.2558	1261.72	98.2297	1261.72	97.8824
1262.2	98.1354	1262.2	98.1167	1262.2	98.1018	1262.2	98.2781	1262.2	98.2564	1262.2	97.904
1262.68	98.1575	1262.68	98.1383	1262.68	98.1252	1262.68	98.3015	1262.68	98.2839	1262.68	97.9248
1263.17	98.1823	1263.17	98.1619	1263.17	98.1501	1263.17	98.3258	1263.17	98.3113	1263.17	97.9448
1263.65	98.2084	1263.65	98.1864	1263.65	98.1755	1263.65	98.3504	1263.65	98.3379	1263.65	97.9639
1264.13	98.2343	1264.13	98.2107	1264.13	98.2004	1264.13	98.375	1264.13	98.3627	1264.13	97.9819
1264.61	98.2584	1264.61	98.2335	1264.61	98.2237	1264.61	98.3987	1264.61	98.3852	1264.61	97.9985
1265.09	98.2795	1265.09	98.2539	1265.09	98.2446	1265.09	98.4206	1265.09	98.4048	1265.09	98.013
1265.58	98.2968	1265.58	98.2711	1265.58	98.2625	1265.58	98.4398	1265.58	98.4212	1265.58	98.0246
1266.06	98.3099	1266.06	98.2848	1266.06	98.277	1266.06	98.4556	1266.06	98.4338	1266.06	98.0326
1266.54	98.319	1266.54	98.295	1266.54	98.2879	1266.54	98.4675	1266.54	98.4427	1266.54	98.0363
1267.02	98.3243	1267.02	98.3015	1267.02	98.295	1267.02	98.4752	1267.02	98.4474	1267.02	98.0352
1267.51	98.3263	1267.51	98.3044	1267.51	98.2981	1267.51	98.4787	1267.51	98.448	1267.51	98.0292
1267.99	98.3253	1267.99	98.3039	1267.99	98.297	1267.99	98.4778	1267.99	98.4445	1267.99	98.0182
1268.47	98.3214	1268.47	98.3001	1268.47	98.2916	1268.47	98.4728	1268.47	98.437	1268.47	98.0025
1268.95	98.3151	1268.95	98.2934	1268.95	98.282	1268.95	98.4637	1268.95	98.4259	1268.95	97.9824
1269.43	98.3065	1269.43	98.2843	1269.43	98.2686	1269.43	98.4506	1269.43	98.4114	1269.43	97.9583
1269.92	98.2961	1269.92	98.2736	1269.92	98.2522	1269.92	98.4341	1269.92	98.3941	1269.92	97.9307
1270.4	98.2845	1270.4	98.2618	1270.4	98.2337	1270.4	98.4146	1270.4	98.3745	1270.4	97.9003
1270.88	98.2722	1270.88	98.2497	1270.88	98.2141	1270.88	98.3931	1270.88	98.3532	1270.88	97.8679
1271.36	98.2598	1271.36	98.2375	1271.36	98.1945	1271.36	98.3706	1271.36	98.3307	1271.36	97.8342
1271.84	98.2478	1271.84	98.2255	1271.84	98.1756	1271.84	98.3484	1271.84	98.3079	1271.84	97.8003
1272.33	98.2365	1272.33	98.2136	1272.33	98.1579	1272.33	98.3272	1272.33	98.2854	1272.33	97.767
1272.81	98.2262	1272.81	98.2018	1272.81	98.1416	1272.81	98.3076	1272.81	98.2636	1272.81	97.7352
1273.29	98.2169	1273.29	98.1899	1273.29	98.1264	1273.29	98.2899	1273.29	98.2429	1273.29	97.705
1273.77	98.2086	1273.77	98.1779	1273.77	98.1122	1273.77	98.2736	1273.77	98.2235	1273.77	97.6766
1274.26	98.2011	1274.26	98.166	1274.26	98.0986	1274.26	98.2583	1274.26	98.205	1274.26	97.6497
1274.74	98.1944	1274.74	98.1543	1274.74	98.0851	1274.74	98.2432	1274.74	98.1868	1274.74	97.6239
1275.22	98.188	1275.22	98.1428	1275.22	98.0716	1275.22	98.2276	1275.22	98.1685	1275.22	97.5986
1275.7	98.1815	1275.7	98.1314	1275.7	98.0578	1275.7	98.2112	1275.7	98.1492	1275.7	97.5733
1276.18	98.1748	1276.18	98.12	1276.18	98.0434	1276.18	98.1935	1276.18	98.1287	1276.18	97.5478
1276.66	98.1676	1276.66	98.1084	1276.66	98.0284	1276.66	98.1748	1276.66	98.1068	1276.66	97.522
1277.15	98.1602	1277.15	98.0964	1277.15	98.0127	1277.15	98.1551	1277.15	98.0836	1277.15	97.496
1277.63	98.1527	1277.63	98.0838	1277.63	97.9964	1277.63	98.1349	1277.63	98.0596	1277.63	97.47
1278.11	98.1459	1278.11	98.0706	1278.11	97.9796	1278.11	98.1146	1278.11	98.0351	1278.11	97.4441
1278.59	98.14	1278.59	98.0566	1278.59	97.9624	1278.59	98.0943	1278.59	98.0106	1278.59	97.4186
1279.08	98.1354	1279.08	98.0419	1279.08	97.945	1279.08	98.0744	1279.08	97.9864	1279.08	97.3934
1279.56	98.1319	1279.56	98.0265	1279.56	97.9275	1279.56	98.0549	1279.56	97.9627	1279.56	97.3686
1280.04	98.129	1280.04	98.0107	1280.04	97.9097	1280.04	98.0358	1280.04	97.9397	1280.04	97.3442
1280.52	98.1261	1280.52	97.9948	1280.52	97.8918	1280.52	98.0171	1280.52	97.9174	1280.52	97.3203
1281	98.1223	1281	97.9792	1281	97.8736	1281	97.9988	1281	97.8961	1281	97.2972
1281.49	98.1173	1281.49	97.9644	1281.49	97.8554	1281.49	97.9808	1281.49	97.8759	1281.49	97.2751
1281.97	98.1109	1281.97	97.9511	1281.97	97.8377	1281.97	97.9633	1281.97	97.857	1281.97	97.2544
1282.45	98.1037	1282.45	97.9396	1282.45	97.821	1282.45	97.9463	1282.45	97.8394	1282.45	97.2354
1282.93	98.0963	1282.93	97.9301	1282.93	97.806	1282.93	97.9301	1282.93	97.8231	1282.93	97.218
1283.41	98.0897	1283.41	97.9224	1283.41	97.7931	1283.41	97.9148	1283.41	97.8077	1283.41	97.2022
1283.9	98.0847	1283.9	97.9161	1283.9	97.7826	1283.9	97.9006	1283.9	97.7927	1283.9	97.1874
1284.38	98.0817	1284.38	97.9106	1284.38	97.7742	1284.38	97.8873	1284.38	97.7777	1284.38	97.1732
1284.86	98.0804	1284.86	97.9051	1284.86	97.7674	1284.86	97.8746	1284.86	97.7621	1284.86	97.1587
1285.34	98.0804	1285.34	97.8991	1285.34	97.7612	1285.34	97.8622	1285.34	97.7455	1285.34	97.1437
1285.83	98.081	1285.83	97.8922	1285.83	97.7549	1285.83	97.8495	1285.83	97.7278	1285.83	97.1277
1286.31	98.0812	1286.31	97.8843	1286.31	97.7475	1286.31	97.8361	1286.31	97.7093	1286.31	97.1108
1286.79	98.0805	1286.79	97.8755	1286.79	97.7387	1286.79	97.8219	1286.79	97.6903	1286.79	97.0935
1287.27	98.0784	1287.27	97.8659	1287.27	97.7283	1287.27	97.8069	1287.27	97.6713	1287.27	97.076
1287.75	98.0748	1287.75	97.8559	1287.75	97.7165	1287.75	97.7915	1287.75	97.6528	1287.75	97.059
1288.24	98.0696	1288.24	97.8456	1288.24	97.7035	1288.24	97.7761	1288.24	97.6352	1288.24	97.0425
1288.72	98.0632	1288.72	97.8355	1288.72	97.6897	1288.72	97.7613	1288.72	97.6188	1288.72	97.0266
1289.2	98.0558	1289.2	97.8255	1289.2	97.6756	1289.2	97.7475	1289.2	97.6036	1289.2	97.0109
1289.68	98.0481	1289.68	97.8159	1289.68	97.6616	1289.68	97.7348	1289.68	97.5894	1289.68	96.9952
1290.16	98.0405	1290.16	97.8066	1290.16	97.648	1290.16	97.7233	1290.16	97.5758	1290.16	96.9789
1290.65	98.0337	1290.65	97.7976	1290.65	97.635	1290.65	97.7126	1290.65	97.5626	1290.65	96.9617
1291.13	98.0281	1291.13	97.7886	1291.13	97.6229	1291.13	97.7022	1291.13	97.5493	1291.13	96.9431
1291.61	98.0242	1291.61	97.7795	1291.61	97.6116	1291.61	97.6916	1291.61	97.5354	1291.61	96.923
1292.09	98.0221	1292.09	97.7699	1292.09	97.6009	1292.09	97.6802	1292.09	97.5204	1292.09	96.9012
1292.58	98.0216	1292.58	97.7596	1292.58	97.5904	1292.58	97.6676	1292.58	97.504	1292.58	96.8774
1293.06	98.0223	1293.06	97.7486	1293.06	97.5798	1293.06	97.6535	1293.06	97.4855	1293.06	96.8513
1293.54	98.0238	1293.54	97.7373	1293.54	97.5685	1293.54	97.6377	1293.54	97.4649	1293.54	96.8228
1294.02	98.0254	1294.02	97.7259	1294.02	97.5564	1294.02	97.6204	1294.02	97.4419	1294.02	96.7918
1294.5	98.0268	1294.5	97.715	1294.5	97.5436	1294.5	97.6018	1294.5	97.4169	1294.5	96.7585
1294.99	98.0276	1294.99	97.705	1294.99	97.5301	1294.99	97.5824	1294.99	97.3904	1294.99	96.7235
1295.47	98.0277	1295.47	97.6959	1295.47	97.5163	1295.47	97.5624	1295.47	97.363	1295.47	96.6874
1295.95	98.0269	1295.95	97.6875	1295.95	97.5023	1295.95	97.5421	1295.95	97.3353	1295.95	96.6508
1296.43	98.0251	1296.43	97.6792	1296.43	97.4879	1296.43	97.5215	1296.43	97.3078	1296.43	96.6143
1296.91	98.0221	1296.91	97.6701	1296.91	97.4727	1296.91	97.5001	1296.91	97.2806	1296.91	96.5781
1297.4	98.0177	1297.4	97.6595	1297.4	97.456	1297.4	97.4778	1297.4	97.2536	1297.4	96.5421
1297.88	98.0117	1297.88	97.6466	1297.88	97.4371	1297.88	97.4539	1297.88	97.2261	1297.88	96.5066
1298.36	98.0043	1298.36	97.6315	1298.36	97.4155	1298.36	97.4282	1298.36	97.1978	1298.36	96.472
1298.84	97.9957	1298.84	97.6142	1298.84	97.3915	1298.84	97.4009	1298.84	97.1685	1298.84	96.4392
1299.33	97.9865	1299.33	97.5956	1299.33	97.3657	1299.33	97.3724	1299.33	97.1384	1299.33	96.4097
1299.81	97.9774	1299.81	97.5766	1299.81	97.3393	1299.81	97.3438	1299.81	97.1084	1299.81	96.3856
1300.29	97.969	1300.29	97.5585	1300.29	97.314	1300.29	97.3164	1300.29	97.0801	1300.29	96.3691
1300.77	97.9618	1300.77	97.5423	1300.77	97.2913	1300.77	97.2917	1300.77	97.0553	1300.77	96.3623
1301.25	97.9563	1301.25	97.529	1301.25	97.2728	1301.25	97.2713	1301.25	97.0359	1301.25	96.3666
1301.74	97.9525	1301.74	97.5192	1301.74	97.2596	1301.74	97.2566	1301.74	97.0239	1301.74	96.3829
1302.22	97.9505	1302.22	97.5136	1302.22	97.2526	1302.22	97.2488	1302.22	97.0207	1302.22	96.4113
1302.7	97.9502	1302.7	97.5124	1302.7	97.2524	1302.7	97.2492	1302.7	97.0277	1302.7	96.4517
1303.18	97.9516	1303.18	97.5161	1303.18	97.2595	1303.18	97.2586	1303.18	97.0455	1303.18	96.5033
1303.66	97.9547	1303.66	97.5247	1303.66	97.2739	1303.66	97.2773	1303.66	97.0744	1303.66	96.5655
1304.15	97.9595	1304.15	97.5383	1304.15	97.2957	1304.15	97.3055	1304.15	97.1143	1304.15	96.6375
1304.63	97.966	1304.63	97.5568	1304.63	97.3246	1304.63	97.3427	1304.63	97.1644	1304.63	96.7184
1305.11	97.974	1305.11	97.58	1305.11	97.3598	1305.11	97.388	1305.11	97.2235	1305.11	96.8069
1305.59	97.9834	1305.59	97.6073	1305.59	97.4005	1305.59	97.4401	1305.59	97.2901	1305.59	96.9018
1306.08	97.9942	1306.08	97.6383	1306.08	97.4456	1306.08	97.4977	1306.08	97.3623	1306.08	97.0014
1306.56	98.0061	1306.56	97.6725	1306.56	97.494	1306.56	97.5592	1306.56	97.4383	1306.56	97.1041
1307.04	98.0192	1307.04	97.7092	1307.04	97.5448	1307.04	97.6234	1307.04	97.5164	1307.04	97.2082
1307.52	98.0334	1307.52	97.7479	1307.52	97.5972	1307.52	97.6892	1307.52	97.5953	1307.52	97.3122
1308	98.0485	1308	97.7878	1308	97.6506	1308	97.7556	1308	97.6741	1308	97.4148
1308.48	98.0643	1308.48	97.8282	1308.48	97.7044	1308.48	97.8217	1308.48	97.7519	1308.48	97.515
1308.97	98.0801	1308.97	97.8681	1308.97	97.7579	1308.97	97.8867	1308.97	97.8282	1308.97	97.6119
1309.45	98.0955	1309.45	97.9066	1309.45	97.8104	1309.45	97.9494	1309.45	97.9022	1309.45	97.7047
1309.93	98.1098	1309.93	97.9429	1309.93	97.861	1309.93	98.009	1309.93	97.9733	1309.93	97.7927
1310.41	98.1226	1310.41	97.9765	1310.41	97.9089	1310.41	98.0647	1310.41	98.0408	1310.41	97.8757
1310.9	98.1336	1310.9	98.0072	1310.9	97.9534	1310.9	98.1162	1310.9	98.1042	1310.9	97.9534
1311.38	98.1432	1311.38	98.0355	1311.38	97.9943	1311.38	98.1636	1311.38	98.1632	1311.38	98.0261
1311.86	98.1517	1311.86	98.0617	1311.86	98.0318	1311.86	98.2077	1311.86	98.2179	1311.86	98.0942
1312.34	98.1597	1312.34	98.0866	1312.34	98.0663	1312.34	98.249	1312.34	98.2686	1312.34	98.1582
1312.83	98.1676	1312.83	98.1105	1312.83	98.0984	1312.83	98.2883	1312.83	98.316	1312.83	98.2184
1313.31	98.1755	1313.31	98.1337	1313.31	98.1286	1313.31	98.326	1313.31	98.3602	1313.31	98.2749
1313.79	98.1835	1313.79	98.1559	1313.79	98.1569	1313.79	98.3619	1313.79	98.4017	1313.79	98.3278
1314.27	98.1911	1314.27	98.1767	1314.27	98.1834	1314.27	98.3956	1314.27	98.4402	1314.27	98.3768
1314.75	98.198	1314.75	98.1957	1314.75	98.2077	1314.75	98.4264	1314.75	98.4757	1314.75	98.4215
1315.23	98.204	1315.23	98.2123	1315.23	98.2294	1315.23	98.4537	1315.23	98.508	1315.23	98.462
1315.72	98.2089	1315.72	98.2265	1315.72	98.2485	1315.72	98.4776	1315.72	98.5371	1315.72	98.4984
1316.2	98.2129	1316.2	98.2383	1316.2	98.2653	1316.2	98.4983	1316.2	98.5634	1316.2	98.531
1316.68	98.2164	1316.68	98.2482	1316.68	98.2803	1316.68	98.5168	1316.68	98.5874	1316.68	98.5607
1317.16	98.2195	1317.16	98.2569	1317.16	98.2942	1317.16	98.5338	1317.16	98.6096	1317.16	98.5882
1317.65	98.2225	1317.65	98.2651	1317.65	98.3076	1317.65	98.5503	1317.65	98.6307	1317.65	98.6141
1318.13	98.2255	1318.13	98.2731	1318.13	98.3208	1318.13	98.5669	1318.13	98.6509	1318.13	98.6388
1318.61	98.2285	1318.61	98.2816	1318.61	98.3337	1318.61	98.5835	1318.61	98.6702	1318.61	98.6626
1319.09	98.2314	1319.09	98.2904	1319.09	98.346	1319.09	98.6001	1319.09	98.6883	1319.09	98.6855
1319.57	98.2341	1319.57	98.2996	1319.57	98.3573	1319.57	98.616	1319.57	98.7052	1319.57	98.7074
1320.06	98.2368	1320.06	98.3088	1320.06	98.3675	1320.06	98.6308	1320.06	98.7203	1320.06	98.728
1320.54	98.2393	1320.54	98.3174	1320.54	98.3763	1320.54	98.6442	1320.54	98.7339	1320.54	98.7472
1321.02	98.2417	1321.02	98.3251	1321.02	98.3841	1321.02	98.6558	1321.02	98.746	1321.02	98.7648
1321.5	98.244	1321.5	98.3314	1321.5	98.3913	1321.5	98.6658	1321.5	98.7568	1321.5	98.7807
1321.98	98.2462	1321.98	98.3361	1321.98	98.3983	1321.98	98.6741	1321.98	98.7667	1321.98	98.7949
1322.47	98.2481	1322.47	98.3393	1322.47	98.4056	1322.47	98.681	1322.47	98.7759	1322.47	98.8074
1322.95	98.2499	1322.95	98.341	1322.95	98.4129	1322.95	98.6866	1322.95	98.7842	1322.95	98.8182
1323.43	98.2516	1323.43	98.3418	1323.43	98.4201	1323.43	98.6911	1323.43	98.7918	1323.43	98.8273
1323.91	98.2534	1323.91	98.3419	1323.91	98.4267	1323.91	98.6948	1323.91	98.7985	1323.91	98.8347
1324.4	98.2554	1324.4	98.3419	1324.4	98.4322	1324.4	98.6977	1324.4	98.8042	1324.4	98.8407
1324.88	98.2578	1324.88	98.342	1324.88	98.4364	1324.88	98.7003	1324.88	98.8091	1324.88	98.8452
1325.36	98.2604	1325.36	98.3423	1325.36	98.4391	1325.36	98.7026	1325.36	98.8133	1325.36	98.8483
1325.84	98.2632	1325.84	98.3429	1325.84	98.4403	1325.84	98.7049	1325.84	98.8168	1325.84	98.85
1326.32	98.2657	1326.32	98.3437	1326.32	98.44	1326.32	98.7069	1326.32	98.8199	1326.32	98.8506
1326.81	98.2676	1326.81	98.3445	1326.81	98.4385	1326.81	98.7086	1326.81	98.8226	1326.81	98.85
1327.29	98.2685	1327.29	98.3452	1327.29	98.4358	1327.29	98.7095	1327.29	98.8248	1327.29	98.8486
1327.77	98.2682	1327.77	98.3458	1327.77	98.4322	1327.77	98.7097	1327.77	98.8264	1327.77	98.8464
1328.25	98.2668	1328.25	98.3462	1328.25	98.428	1328.25	98.7091	1328.25	98.8275	1328.25	98.8441
1328.73	98.2646	1328.73	98.3465	1328.73	98.4238	1328.73	98.7081	1328.73	98.8282	1328.73	98.842
1329.22	98.2622	1329.22	98.3468	1329.22	98.4203	1329.22	98.7071	1329.22	98.829	1329.22	98.8408
1329.7	98.26	1329.7	98.3473	1329.7	98.4181	1329.7	98.7068	1329.7	98.83	1329.7	98.8409
1330.18	98.2584	1330.18	98.3482	1330.18	98.4178	1330.18	98.7075	1330.18	98.8317	1330.18	98.8427
1330.66	98.2576	1330.66	98.3495	1330.66	98.4194	1330.66	98.7096	1330.66	98.8342	1330.66	98.8463
1331.14	98.2576	1331.14	98.3515	1331.14	98.4228	1331.14	98.7129	1331.14	98.8374	1331.14	98.8513
1331.63	98.258	1331.63	98.3541	1331.63	98.427	1331.63	98.7171	1331.63	98.8409	1331.63	98.8573
1332.11	98.2586	1332.11	98.3569	1332.11	98.4313	1332.11	98.7215	1332.11	98.8443	1332.11	98.8635
1332.59	98.259	1332.59	98.3598	1332.59	98.4347	1332.59	98.7255	1332.59	98.8471	1332.59	98.869
1333.07	98.2589	1333.07	98.3622	1333.07	98.4367	1333.07	98.7285	1333.07	98.849	1333.07	98.8734
1333.56	98.2581	1333.56	98.3638	1333.56	98.437	1333.56	98.7303	1333.56	98.8499	1333.56	98.8764
1334.04	98.2567	1334.04	98.3645	1334.04	98.4362	1334.04	98.7308	1334.04	98.8501	1334.04	98.8779
1334.52	98.2549	1334.52	98.3641	1334.52	98.4348	1334.52	98.7301	1334.52	98.8498	1334.52	98.8786
1335	98.253	1335	98.3631	1335	98.4333	1335	98.7287	1335	98.8495	1335	98.8788
1335.48	98.2513	1335.48	98.3619	1335.48	98.4324	1335.48	98.7269	1335.48	98.8494	1335.48	98.8793
1335.97	98.2503	1335.97	98.3611	1335.97	98.4322	1335.97	98.7254	1335.97	98.8498	1335.97	98.8802
1336.45	98.2501	1336.45	98.3609	1336.45	98.4325	1336.45	98.7245	1336.45	98.8506	1336.45	98.8816
1336.93	98.251	1336.93	98.3618	1336.93	98.4332	1336.93	98.7247	1336.93	98.8516	1336.93	98.8834
1337.41	98.2528	1337.41	98.3634	1337.41	98.4339	1337.41	98.726	1337.41	98.8526	1337.41	98.8853
1337.89	98.2554	1337.89	98.3653	1337.89	98.4345	1337.89	98.7284	1337.89	98.8534	1337.89	98.8868
1338.38	98.2584	1338.38	98.3671	1338.38	98.4348	1338.38	98.7315	1338.38	98.8537	1338.38	98.8874
1338.86	98.2615	1338.86	98.3681	1338.86	98.4349	1338.86	98.7348	1338.86	98.8536	1338.86	98.8869
1339.34	98.2642	1339.34	98.3681	1339.34	98.4347	1339.34	98.7377	1339.34	98.8529	1339.34	98.8848
1339.82	98.2662	1339.82	98.3669	1339.82	98.4342	1339.82	98.7393	1339.82	98.8515	1339.82	98.8808
1340.31	98.2672	1340.31	98.3647	1340.31	98.4331	1340.31	98.739	1340.31	98.849	1340.31	98.8741
1340.79	98.2672	1340.79	98.3617	1340.79	98.431	1340.79	98.7361	1340.79	98.8451	1340.79	98.8642
1341.27	98.266	1341.27	98.3582	1341.27	98.4277	1341.27	98.7302	1341.27	98.839	1341.27	98.8504
1341.75	98.2639	1341.75	98.3544	1341.75	98.4228	1341.75	98.7211	1341.75	98.8302	1341.75	98.832
1342.23	98.2607	1342.23	98.3502	1342.23	98.416	1342.23	98.7087	1342.23	98.8179	1342.23	98.8084
1342.72	98.2568	1342.72	98.3452	1342.72	98.4069	1342.72	98.693	1342.72	98.8014	1342.72	98.7791
1343.2	98.2522	1343.2	98.3391	1343.2	98.3953	1343.2	98.6743	1343.2	98.7804	1343.2	98.7439
1343.68	98.2469	1343.68	98.3311	1343.68	98.3812	1343.68	98.6527	1343.68	98.7549	1343.68	98.7029
1344.16	98.2413	1344.16	98.3208	1344.16	98.3645	1344.16	98.6286	1344.16	98.7249	1344.16	98.656
1344.64	98.2354	1344.64	98.3079	1344.64	98.3451	1344.64	98.6024	1344.64	98.6911	1344.64	98.6039
1345.13	98.2293	1345.13	98.292	1345.13	98.3236	1345.13	98.5745	1345.13	98.6541	1345.13	98.5473
1345.61	98.2231	1345.61	98.2736	1345.61	98.3002	1345.61	98.5453	1345.61	98.6149	1345.61	98.4874
1346.09	98.2167	1346.09	98.2531	1346.09	98.2757	1346.09	98.5153	1346.09	98.5743	1346.09	98.4258
1346.57	98.2102	1346.57	98.2312	1346.57	98.2507	1346.57	98.4848	1346.57	98.5336	1346.57	98.3645
1347.06	98.2033	1347.06	98.209	1347.06	98.2261	1347.06	98.4544	1347.06	98.4936	1347.06	98.3054
1347.54	98.1959	1347.54	98.1873	1347.54	98.2024	1347.54	98.4248	1347.54	98.4553	1347.54	98.2505
1348.02	98.188	1348.02	98.167	1348.02	98.1802	1348.02	98.3967	1348.02	98.4198	1348.02	98.2013
1348.5	98.1797	1348.5	98.1491	1348.5	98.1599	1348.5	98.3709	1348.5	98.388	1348.5	98.1592
1348.98	98.1712	1348.98	98.1339	1348.98	98.1419	1348.98	98.3484	1348.98	98.3608	1348.98	98.1247
1349.47	98.1631	1349.47	98.122	1349.47	98.1265	1349.47	98.3298	1349.47	98.3387	1349.47	98.0982
1349.95	98.1559	1349.95	98.1133	1349.95	98.1141	1349.95	98.3157	1349.95	98.3222	1349.95	98.0796
1350.43	98.15	1350.43	98.1078	1350.43	98.1049	1350.43	98.3062	1350.43	98.3114	1350.43	98.0687
1350.91	98.1459	1350.91	98.1054	1350.91	98.0991	1350.91	98.3011	1350.91	98.306	1350.91	98.0648
1351.39	98.1438	1351.39	98.1056	1351.39	98.0966	1351.39	98.3	1351.39	98.3053	1351.39	98.0673
1351.88	98.1437	1351.88	98.1082	1351.88	98.097	1351.88	98.3023	1351.88	98.3087	1351.88	98.0752
1352.36	98.1454	1352.36	98.1127	1352.36	98.1002	1352.36	98.3076	1352.36	98.3154	1352.36	98.0876
1352.84	98.1487	1352.84	98.1187	1352.84	98.1055	1352.84	98.3155	1352.84	98.3248	1352.84	98.1034
1353.32	98.1532	1353.32	98.1258	1353.32	98.1127	1353.32	98.3256	1353.32	98.3364	1353.32	98.1218
1353.81	98.1586	1353.81	98.1338	1353.81	98.1213	1353.81	98.3378	1353.81	98.3502	1353.81	98.142
1354.29	98.1646	1354.29	98.1423	1354.29	98.1311	1354.29	98.3516	1354.29	98.3658	1354.29	98.1635
1354.77	98.1707	1354.77	98.1511	1354.77	98.1418	1354.77	98.3665	1354.77	98.3831	1354.77	98.186
1355.25	98.1765	1355.25	98.1602	1355.25	98.1531	1355.25	98.3819	1355.25	98.4017	1355.25	98.2091
1355.73	98.1814	1355.73	98.169	1355.73	98.1646	1355.73	98.3971	1355.73	98.4209	1355.73	98.2327
1356.22	98.1849	1356.22	98.1775	1356.22	98.1756	1356.22	98.4114	1356.22	98.4399	1356.22	98.2564
1356.7	98.1869	1356.7	98.1852	1356.7	98.1856	1356.7	98.4242	1356.7	98.4578	1356.7	98.2797
1357.18	98.1873	1357.18	98.1919	1357.18	98.194	1357.18	98.4355	1357.18	98.4742	1357.18	98.3025
1357.66	98.1862	1357.66	98.1973	1357.66	98.2007	1357.66	98.4452	1357.66	98.4889	1357.66	98.3245
1358.14	98.1842	1358.14	98.2014	1358.14	98.206	1358.14	98.4539	1358.14	98.502	1358.14	98.3459
1358.63	98.1819	1358.63	98.2045	1358.63	98.2102	1358.63	98.462	1358.63	98.5141	1358.63	98.3671
1359.11	98.1798	1359.11	98.2068	1359.11	98.2143	1359.11	98.4701	1359.11	98.5259	1359.11	98.3884
1359.59	98.1785	1359.59	98.209	1359.59	98.219	1359.59	98.4787	1359.59	98.5382	1359.59	98.4103
1360.07	98.1781	1360.07	98.2116	1360.07	98.2249	1360.07	98.4879	1360.07	98.5513	1360.07	98.4331
1360.56	98.1785	1360.56	98.215	1360.56	98.2324	1360.56	98.4981	1360.56	98.5655	1360.56	98.4566
1361.04	98.1796	1361.04	98.2197	1361.04	98.2415	1361.04	98.509	1361.04	98.5806	1361.04	98.4807
1361.52	98.1811	1361.52	98.2254	1361.52	98.2519	1361.52	98.5205	1361.52	98.5962	1361.52	98.5047
1362	98.1827	1362	98.2322	1362	98.2631	1362	98.5324	1362	98.612	1362	98.5282
1362.48	98.1843	1362.48	98.2397	1362.48	98.2745	1362.48	98.5442	1362.48	98.6272	1362.48	98.5508
1362.96	98.1859	1362.96	98.2472	1362.96	98.2857	1362.96	98.5556	1362.96	98.6416	1362.96	98.5722
1363.45	98.1875	1363.45	98.2545	1363.45	98.2962	1363.45	98.5661	1363.45	98.6547	1363.45	98.5925
1363.93	98.1891	1363.93	98.261	1363.93	98.3055	1363.93	98.5753	1363.93	98.6664	1363.93	98.6116
1364.41	98.1908	1364.41	98.2666	1364.41	98.3134	1364.41	98.5831	1364.41	98.6765	1364.41	98.6295
1364.89	98.1924	1364.89	98.271	1364.89	98.3198	1364.89	98.5894	1364.89	98.6852	1364.89	98.6462
1365.38	98.1938	1365.38	98.2742	1365.38	98.3247	1365.38	98.5945	1365.38	98.6924	1365.38	98.6615
1365.86	98.1949	1365.86	98.2764	1365.86	98.3283	1365.86	98.5987	1365.86	98.6987	1365.86	98.6754
1366.34	98.1955	1366.34	98.2778	1366.34	98.331	1366.34	98.6025	1366.34	98.7041	1366.34	98.6875
1366.82	98.1955	1366.82	98.2786	1366.82	98.3331	1366.82	98.6064	1366.82	98.7092	1366.82	98.6982
1367.31	98.1951	1367.31	98.2791	1367.31	98.3352	1367.31	98.6106	1367.31	98.7142	1367.31	98.7075
1367.79	98.1942	1367.79	98.2797	1367.79	98.3376	1367.79	98.6156	1367.79	98.7193	1367.79	98.7158
1368.27	98.1931	1368.27	98.2805	1368.27	98.3406	1368.27	98.6213	1368.27	98.7247	1368.27	98.7237
1368.75	98.1918	1368.75	98.2815	1368.75	98.3441	1368.75	98.6276	1368.75	98.7302	1368.75	98.7314
1369.23	98.1904	1369.23	98.2826	1369.23	98.348	1369.23	98.6341	1369.23	98.7358	1369.23	98.7391
1369.71	98.189	1369.71	98.2836	1369.71	98.3519	1369.71	98.6403	1369.71	98.7411	1369.71	98.7467
1370.2	98.1875	1370.2	98.2843	1370.2	98.3553	1370.2	98.6457	1370.2	98.7459	1370.2	98.7539
1370.68	98.1859	1370.68	98.2844	1370.68	98.3578	1370.68	98.6498	1370.68	98.7501	1370.68	98.7602
1371.16	98.1842	1371.16	98.284	1371.16	98.3593	1371.16	98.6525	1371.16	98.7535	1371.16	98.7655
1371.64	98.1825	1371.64	98.2831	1371.64	98.3597	1371.64	98.654	1371.64	98.7563	1371.64	98.7697
1372.13	98.1809	1372.13	98.2822	1372.13	98.3593	1372.13	98.6547	1372.13	98.7585	1372.13	98.7729
1372.61	98.1798	1372.61	98.2816	1372.61	98.3584	1372.61	98.6555	1372.61	98.7606	1372.61	98.7756
1373.09	98.1793	1373.09	98.2818	1373.09	98.3576	1373.09	98.6569	1373.09	98.763	1373.09	98.7786
1373.57	98.1795	1373.57	98.2831	1373.57	98.3573	1373.57	98.6595	1373.57	98.7659	1373.57	98.7825
1374.05	98.1806	1374.05	98.2854	1374.05	98.3579	1374.05	98.6634	1374.05	98.7696	1374.05	98.7875
1374.54	98.1823	1374.54	98.2886	1374.54	98.3595	1374.54	98.6686	1374.54	98.7742	1374.54	98.794
1375.02	98.1846	1375.02	98.2923	1375.02	98.362	1375.02	98.6745	1375.02	98.7794	1375.02	98.8018
1375.5	98.1871	1375.5	98.2961	1375.5	98.3655	1375.5	98.6804	1375.5	98.7854	1375.5	98.8105
1375.98	98.1898	1375.98	98.2996	1375.98	98.3697	1375.98	98.686	1375.98	98.7917	1375.98	98.8198
1376.46	98.1925	1376.46	98.3029	1376.46	98.3744	1376.46	98.691	1376.46	98.7982	1376.46	98.8294
1376.95	98.1953	1376.95	98.3059	1376.95	98.3796	1376.95	98.6954	1376.95	98.8049	1376.95	98.8393
1377.43	98.1985	1377.43	98.3089	1377.43	98.3852	1377.43	98.6994	1377.43	98.8118	1377.43	98.8496
1377.91	98.202	1377.91	98.3122	1377.91	98.391	1377.91	98.7036	1377.91	98.8191	1377.91	98.8603
1378.39	98.2059	1378.39	98.3161	1378.39	98.397	1378.39	98.708	1378.39	98.8267	1378.39	98.8715
1378.88	98.2098	1378.88	98.3207	1378.88	98.4028	1378.88	98.7127	1378.88	98.8347	1378.88	98.8833
1379.36	98.2134	1379.36	98.3257	1379.36	98.4082	1379.36	98.7176	1379.36	98.8429	1379.36	98.8952
1379.84	98.2162	1379.84	98.3311	1379.84	98.413	1379.84	98.7224	1379.84	98.8513	1379.84	98.9069
1380.32	98.2181	1380.32	98.3363	1380.32	98.4171	1380.32	98.727	1380.32	98.8594	1380.32	98.9178
1380.8	98.2192	1380.8	98.341	1380.8	98.4205	1380.8	98.7313	1380.8	98.8672	1380.8	98.9275
1381.29	98.2198	1381.29	98.3452	1381.29	98.4234	1381.29	98.7354	1381.29	98.8745	1381.29	98.9358
1381.77	98.2206	1381.77	98.3488	1381.77	98.4262	1381.77	98.7395	1381.77	98.8814	1381.77	98.9426
1382.25	98.2222	1382.25	98.352	1382.25	98.4292	1382.25	98.7441	1382.25	98.8879	1382.25	98.9483
1382.73	98.2251	1382.73	98.3551	1382.73	98.4325	1382.73	98.7491	1382.73	98.8941	1382.73	98.953
1383.21	98.2294	1383.21	98.3584	1383.21	98.4363	1383.21	98.7546	1383.21	98.9002	1383.21	98.9571
1383.7	98.2347	1383.7	98.3621	1383.7	98.4403	1383.7	98.7605	1383.7	98.9063	1383.7	98.961
1384.18	98.2404	1384.18	98.3664	1384.18	98.4445	1384.18	98.7664	1384.18	98.9123	1384.18	98.9649
1384.66	98.2458	1384.66	98.3711	1384.66	98.4486	1384.66	98.7722	1384.66	98.9181	1384.66	98.9692
1385.14	98.2501	1385.14	98.3759	1385.14	98.4526	1385.14	98.7775	1385.14	98.9238	1385.14	98.9739
1385.62	98.2531	1385.62	98.3806	1385.62	98.4567	1385.62	98.7824	1385.62	98.9292	1385.62	98.9791
1386.11	98.2546	1386.11	98.3846	1386.11	98.4608	1386.11	98.7867	1386.11	98.9339	1386.11	98.9849
1386.59	98.2546	1386.59	98.3876	1386.59	98.465	1386.59	98.7905	1386.59	98.9379	1386.59	98.9911
1387.07	98.2536	1387.07	98.3894	1387.07	98.4691	1387.07	98.7938	1387.07	98.9408	1387.07	98.9974
1387.55	98.2518	1387.55	98.3899	1387.55	98.4729	1387.55	98.7965	1387.55	98.9426	1387.55	99.0036
1388.04	98.2498	1388.04	98.3897	1388.04	98.4762	1388.04	98.799	1388.04	98.9433	1388.04	99.0096
1388.52	98.2477	1388.52	98.3891	1388.52	98.4786	1388.52	98.8013	1388.52	98.9431	1388.52	99.0151
1389	98.2461	1389	98.3889	1389	98.4801	1389	98.8037	1389	98.9424	1389	99.0201
1389.48	98.2452	1389.48	98.3898	1389.48	98.4811	1389.48	98.8064	1389.48	98.9418	1389.48	99.0245
1389.96	98.2454	1389.96	98.3919	1389.96	98.4817	1389.96	98.8095	1389.96	98.9416	1389.96	99.0283
1390.45	98.2468	1390.45	98.3952	1390.45	98.4825	1390.45	98.8128	1390.45	98.942	1390.45	99.0314
1390.93	98.2493	1390.93	98.3992	1390.93	98.4836	1390.93	98.8159	1390.93	98.9433	1390.93	99.0333
1391.41	98.2526	1391.41	98.4032	1391.41	98.4849	1391.41	98.8181	1391.41	98.945	1391.41	99.0338
1391.89	98.2561	1391.89	98.4063	1391.89	98.4861	1391.89	98.8189	1391.89	98.9468	1391.89	99.0324
1392.38	98.2592	1392.38	98.4078	1392.38	98.4867	1392.38	98.818	1392.38	98.9483	1392.38	99.0289
1392.86	98.2614	1392.86	98.4073	1392.86	98.4862	1392.86	98.8152	1392.86	98.949	1392.86	99.0231
1393.34	98.2623	1393.34	98.4048	1393.34	98.4845	1393.34	98.811	1393.34	98.9488	1393.34	99.0152
1393.82	98.2617	1393.82	98.401	1393.82	98.4816	1393.82	98.8059	1393.82	98.9476	1393.82	99.0057
1394.3	98.26	1394.3	98.3966	1394.3	98.478	1394.3	98.8006	1394.3	98.9454	1394.3	98.9949
1394.79	98.2575	1394.79	98.3923	1394.79	98.4744	1394.79	98.7959	1394.79	98.9425	1394.79	98.9837
1395.27	98.2548	1395.27	98.3888	1395.27	98.4715	1395.27	98.792	1395.27	98.9391	1395.27	98.9724
1395.75	98.2526	1395.75	98.3865	1395.75	98.4696	1395.75	98.7891	1395.75	98.9356	1395.75	98.9616
1396.23	98.2513	1396.23	98.3854	1396.23	98.4689	1396.23	98.7871	1396.23	98.9321	1396.23	98.9512
1396.71	98.2512	1396.71	98.3853	1396.71	98.4691	1396.71	98.7858	1396.71	98.9291	1396.71	98.9413
1397.2	98.2525	1397.2	98.3858	1397.2	98.4698	1397.2	98.7848	1397.2	98.9265	1397.2	98.9315
1397.68	98.255	1397.68	98.3865	1397.68	98.4702	1397.68	98.7837	1397.68	98.9244	1397.68	98.9212
1398.16	98.2581	1398.16	98.3871	1398.16	98.4698	1398.16	98.7823	1398.16	98.9225	1398.16	98.9097
1398.64	98.2612	1398.64	98.3869	1398.64	98.4682	1398.64	98.78	1398.64	98.9199	1398.64	98.8962
1399.12	98.2634	1399.12	98.3857	1399.12	98.4651	1399.12	98.7766	1399.12	98.916	1399.12	98.8801
1399.61	98.2641	1399.61	98.3832	1399.61	98.4602	1399.61	98.7715	1399.61	98.9096	1399.61	98.8607
1400.09	98.2629	1400.09	98.379	1400.09	98.4536	1400.09	98.7643	1400.09	98.9	1400.09	98.8378
1400.57	98.2597	1400.57	98.373	1400.57	98.4452	1400.57	98.7549	1400.57	98.8864	1400.57	98.8111
1401.05	98.255	1401.05	98.3654	1401.05	98.4353	1401.05	98.7432	1401.05	98.869	1401.05	98.7807
1401.54	98.2495	1401.54	98.3564	1401.54	98.4242	1401.54	98.7295	1401.54	98.8478	1401.54	98.7467
1402.02	98.2441	1402.02	98.3464	1402.02	98.4121	1402.02	98.714	1402.02	98.8238	1402.02	98.7094
1402.5	98.2396	1402.5	98.336	1402.5	98.3995	1402.5	98.6973	1402.5	98.7977	1402.5	98.6686
1402.98	98.2364	1402.98	98.3253	1402.98	98.3865	1402.98	98.6797	1402.98	98.7702	1402.98	98.6245
1403.46	98.2345	1403.46	98.3147	1403.46	98.3733	1403.46	98.6612	1403.46	98.7419	1403.46	98.5769
1403.95	98.2338	1403.95	98.304	1403.95	98.3597	1403.95	98.6419	1403.95	98.7131	1403.95	98.5258
1404.43	98.2336	1404.43	98.2932	1404.43	98.3452	1404.43	98.6214	1404.43	98.6837	1404.43	98.4711
1404.91	98.2333	1404.91	98.2821	1404.91	98.3295	1404.91	98.5994	1404.91	98.6532	1404.91	98.4131
1405.39	98.2324	1405.39	98.2705	1405.39	98.3121	1405.39	98.5757	1405.39	98.6213	1405.39	98.352
1405.88	98.2303	1405.88	98.2581	1405.88	98.2926	1405.88	98.5501	1405.88	98.5871	1405.88	98.2881
1406.36	98.227	1406.36	98.2449	1406.36	98.271	1406.36	98.5223	1406.36	98.5504	1406.36	98.2218
1406.84	98.2222	1406.84	98.2305	1406.84	98.2473	1406.84	98.4923	1406.84	98.5106	1406.84	98.1533
1407.32	98.2161	1407.32	98.2148	1407.32	98.2216	1407.32	98.46	1407.32	98.4676	1407.32	98.0832
1407.8	98.2087	1407.8	98.1974	1407.8	98.1942	1407.8	98.4254	1407.8	98.4216	1407.8	98.012
1408.29	98.2002	1408.29	98.1782	1408.29	98.1651	1408.29	98.3884	1408.29	98.373	1408.29	97.9406
1408.77	98.1911	1408.77	98.1569	1408.77	98.1347	1408.77	98.3493	1408.77	98.3225	1408.77	97.8703
1409.25	98.1817	1409.25	98.1338	1409.25	98.1029	1409.25	98.3085	1409.25	98.2711	1409.25	97.8024
1409.73	98.1725	1409.73	98.1091	1409.73	98.0699	1409.73	98.2668	1409.73	98.2198	1409.73	97.7384
1410.21	98.1635	1410.21	98.0832	1410.21	98.0358	1410.21	98.2248	1410.21	98.1698	1410.21	97.6799
1410.7	98.1547	1410.7	98.0566	1410.7	98.0011	1410.7	98.1835	1410.7	98.122	1410.7	97.6282
1411.18	98.1457	1411.18	98.0298	1411.18	97.9662	1411.18	98.1435	1411.18	98.0771	1411.18	97.5845
1411.66	98.1362	1411.66	98.0033	1411.66	97.9318	1411.66	98.1056	1411.66	98.0359	1411.66	97.5494
1412.14	98.1258	1412.14	97.9775	1412.14	97.8988	1412.14	98.0703	1412.14	97.9991	1412.14	97.5235
1412.62	98.1146	1412.62	97.9531	1412.62	97.8684	1412.62	98.0382	1412.62	97.9673	1412.62	97.5074
1413.11	98.1031	1413.11	97.9309	1413.11	97.8417	1413.11	98.0102	1413.11	97.9415	1413.11	97.5015
1413.59	98.0922	1413.59	97.912	1413.59	97.82	1413.59	97.9874	1413.59	97.9227	1413.59	97.5063
1414.07	98.0831	1414.07	97.8975	1414.07	97.8043	1414.07	97.9711	1414.07	97.9119	1414.07	97.5222
1414.55	98.0768	1414.55	97.8882	1414.55	97.7957	1414.55	97.9626	1414.55	97.91	1414.55	97.5492
1415.04	98.074	1415.04	97.885	1415.04	97.7944	1415.04	97.9632	1415.04	97.9173	1415.04	97.587
1415.52	98.0749	1415.52	97.8881	1415.52	97.8008	1415.52	97.9734	1415.52	97.9341	1415.52	97.635
1416	98.079	1416	97.8973	1416	97.8143	1416	97.9932	1416	97.9599	1416	97.692
1416.48	98.0858	1416.48	97.912	1416.48	97.8345	1416.48	98.0219	1416.48	97.9939	1416.48	97.7565
1416.96	98.0943	1416.96	97.9314	1416.96	97.8604	1416.96	98.058	1416.96	98.0353	1416.96	97.8267
1417.45	98.1037	1417.45	97.9545	1417.45	97.891	1417.45	98.0997	1417.45	98.0827	1417.45	97.9009
1417.93	98.1137	1417.93	97.9804	1417.93	97.9255	1417.93	98.145	1417.93	98.1351	1417.93	97.9775
1418.41	98.1239	1418.41	98.0084	1418.41	97.9627	1418.41	98.1921	1418.41	98.1909	1418.41	98.0551
1418.89	98.1342	1418.89	98.0378	1418.89	98.0017	1418.89	98.2396	1418.89	98.249	1418.89	98.1329
1419.37	98.1445	1419.37	98.0679	1419.37	98.0416	1419.37	98.2864	1419.37	98.308	1419.37	98.2099
1419.86	98.1548	1419.86	98.0981	1419.86	98.0816	1419.86	98.332	1419.86	98.3666	1419.86	98.2857
1420.34	98.1651	1420.34	98.1279	1420.34	98.1209	1420.34	98.3761	1420.34	98.4237	1420.34	98.3597
1420.82	98.1751	1420.82	98.1566	1420.82	98.1588	1420.82	98.4187	1420.82	98.4783	1420.82	98.4313
1421.3	98.1849	1421.3	98.1838	1421.3	98.195	1421.3	98.4596	1421.3	98.5299	1421.3	98.4998
1421.79	98.1944	1421.79	98.2092	1421.79	98.229	1421.79	98.4989	1421.79	98.5782	1421.79	98.5646
1422.27	98.2035	1422.27	98.2325	1422.27	98.2605	1422.27	98.5365	1422.27	98.6231	1422.27	98.6249
1422.75	98.2122	1422.75	98.2538	1422.75	98.2893	1422.75	98.5719	1422.75	98.6648	1422.75	98.6802
1423.23	98.2203	1423.23	98.273	1423.23	98.3153	1423.23	98.6049	1423.23	98.7034	1423.23	98.7302
1423.71	98.2276	1423.71	98.2904	1423.71	98.3383	1423.71	98.6351	1423.71	98.7392	1423.71	98.775
1424.19	98.2343	1424.19	98.306	1424.19	98.3586	1424.19	98.6623	1424.19	98.7721	1424.19	98.8148
1424.68	98.2402	1424.68	98.3199	1424.68	98.3766	1424.68	98.6862	1424.68	98.8024	1424.68	98.8505
1425.16	98.2455	1425.16	98.3322	1425.16	98.3925	1425.16	98.707	1425.16	98.8298	1425.16	98.8826
1425.64	98.2507	1425.64	98.3431	1425.64	98.4069	1425.64	98.7251	1425.64	98.8543	1425.64	98.912
1426.12	98.2557	1426.12	98.3528	1426.12	98.4202	1426.12	98.741	1426.12	98.8759	1426.12	98.9389
1426.61	98.2605	1426.61	98.3614	1426.61	98.4327	1426.61	98.7552	1426.61	98.8948	1426.61	98.9639
1427.09	98.2652	1427.09	98.3691	1427.09	98.4445	1427.09	98.7683	1427.09	98.9113	1427.09	98.9868
1427.57	98.2692	1427.57	98.3762	1427.57	98.4556	1427.57	98.7807	1427.57	98.9258	1427.57	99.0078
1428.05	98.2724	1428.05	98.3829	1428.05	98.466	1428.05	98.7928	1428.05	98.9389	1428.05	99.0269
1428.53	98.2744	1428.53	98.3893	1428.53	98.4757	1428.53	98.8045	1428.53	98.9513	1428.53	99.0439
1429.02	98.2755	1429.02	98.3957	1429.02	98.4847	1429.02	98.816	1429.02	98.9635	1429.02	99.0591
1429.5	98.276	1429.5	98.4023	1429.5	98.4933	1429.5	98.8271	1429.5	98.9761	1429.5	99.0726
1429.98	98.2768	1429.98	98.4091	1429.98	98.5018	1429.98	98.8377	1429.98	98.9892	1429.98	99.0846
1430.46	98.2784	1430.46	98.4159	1430.46	98.5102	1430.46	98.8479	1430.46	99.0028	1430.46	99.0956
1430.94	98.2814	1430.94	98.4224	1430.94	98.5187	1430.94	98.8574	1430.94	99.0166	1430.94	99.1056
1431.43	98.2858	1431.43	98.4283	1431.43	98.5268	1431.43	98.8662	1431.43	99.0297	1431.43	99.1147
1431.91	98.2913	1431.91	98.4332	1431.91	98.5342	1431.91	98.874	1431.91	99.0412	1431.91	99.1227
1432.39	98.2972	1432.39	98.4367	1432.39	98.5403	1432.39	98.8803	1432.39	99.0502	1432.39	99.1292
1432.87	98.3026	1432.87	98.4388	1432.87	98.5445	1432.87	98.8848	1432.87	99.0559	1432.87	99.1335
1433.36	98.3068	1433.36	98.4394	1433.36	98.5465	1433.36	98.8871	1433.36	99.0576	1433.36	99.1349
1433.84	98.3091	1433.84	98.4387	1433.84	98.5461	1433.84	98.8869	1433.84	99.0554	1433.84	99.1329
1434.32	98.3094	1434.32	98.4369	1434.32	98.5434	1434.32	98.8845	1434.32	99.0498	1434.32	99.1272
1434.8	98.3079	1434.8	98.4342	1434.8	98.5389	1434.8	98.8803	1434.8	99.0415	1434.8	99.1181
1435.28	98.3048	1435.28	98.4309	1435.28	98.5331	1435.28	98.8748	1435.28	99.0319	1435.28	99.1063
1435.77	98.3008	1435.77	98.4272	1435.77	98.5268	1435.77	98.8689	1435.77	99.0222	1435.77	99.0929
1436.25	98.2966	1436.25	98.4234	1436.25	98.5206	1436.25	98.8632	1436.25	99.0134	1436.25	99.0794
1436.73	98.2925	1436.73	98.4199	1436.73	98.5149	1436.73	98.8581	1436.73	99.0062	1436.73	99.0669
1437.21	98.2889	1437.21	98.4169	1437.21	98.5099	1437.21	98.8537	1437.21	99.0006	1437.21	99.0559
1437.69	98.2862	1437.69	98.4146	1437.69	98.5054	1437.69	98.8495	1437.69	98.9962	1437.69	99.0465
1438.18	98.2844	1438.18	98.4129	1438.18	98.5013	1438.18	98.8451	1438.18	98.9923	1438.18	99.0381
1438.66	98.2833	1438.66	98.4117	1438.66	98.497	1438.66	98.84	1438.66	98.9878	1438.66	99.0296
1439.14	98.2828	1439.14	98.4104	1439.14	98.4923	1439.14	98.8337	1439.14	98.9821	1439.14	99.0201
1439.62	98.2828	1439.62	98.4084	1439.62	98.487	1439.62	98.8261	1439.62	98.9747	1439.62	99.0089
1440.11	98.2831	1440.11	98.4052	1440.11	98.481	1440.11	98.8173	1440.11	98.9655	1440.11	98.9957
1440.59	98.2835	1440.59	98.4006	1440.59	98.4746	1440.59	98.8075	1440.59	98.9547	1440.59	98.981
1441.07	98.2838	1441.07	98.3947	1441.07	98.468	1441.07	98.7973	1441.07	98.9427	1441.07	98.9652
1441.55	98.284	1441.55	98.3876	1441.55	98.4614	1441.55	98.787	1441.55	98.9301	1441.55	98.949
1442.03	98.2841	1442.03	98.3802	1442.03	98.4551	1442.03	98.777	1442.03	98.9175	1442.03	98.9331
1442.52	98.2841	1442.52	98.3727	1442.52	98.4488	1442.52	98.7673	1442.52	98.9051	1442.52	98.9177
1443	98.2838	1443	98.366	1443	98.4427	1443	98.7579	1443	98.8934	1443	98.9029
1443.48	98.2832	1443.48	98.36	1443.48	98.4364	1443.48	98.7488	1443.48	98.8825	1443.48	98.8885
1443.96	98.2825	1443.96	98.355	1443.96	98.4299	1443.96	98.7398	1443.96	98.8724	1443.96	98.8743
1444.44	98.2816	1444.44	98.3508	1444.44	98.4234	1444.44	98.731	1444.44	98.8632	1444.44	98.8602
1444.93	98.2805	1444.93	98.3473	1444.93	98.417	1444.93	98.7224	1444.93	98.8548	1444.93	98.8463
1445.41	98.2793	1445.41	98.3443	1445.41	98.4109	1445.41	98.7141	1445.41	98.8471	1445.41	98.8329
1445.89	98.278	1445.89	98.3418	1445.89	98.4053	1445.89	98.7066	1445.89	98.8401	1445.89	98.8202
1446.37	98.2767	1446.37	98.3397	1446.37	98.4003	1446.37	98.7	1446.37	98.8338	1446.37	98.8085
1446.86	98.2752	1446.86	98.338	1446.86	98.3958	1446.86	98.6946	1446.86	98.8281	1446.86	98.7981
1447.34	98.2737	1447.34	98.3365	1447.34	98.3915	1447.34	98.6903	1447.34	98.823	1447.34	98.7889
1447.82	98.2719	1447.82	98.3349	1447.82	98.3874	1447.82	98.687	1447.82	98.8182	1447.82	98.7807
1448.3	98.2698	1448.3	98.3329	1448.3	98.3832	1448.3	98.6842	1448.3	98.8136	1448.3	98.7731
1448.78	98.2674	1448.78	98.3301	1448.78	98.3787	1448.78	98.6812	1448.78	98.8086	1448.78	98.7654
1449.27	98.2646	1449.27	98.3264	1449.27	98.374	1449.27	98.6774	1449.27	98.8027	1449.27	98.757
1449.75	98.2614	1449.75	98.3216	1449.75	98.3691	1449.75	98.6725	1449.75	98.7954	1449.75	98.7472
1450.23	98.2579	1450.23	98.3161	1450.23	98.3642	1450.23	98.6664	1450.23	98.7866	1450.23	98.7359
1450.71	98.2543	1450.71	98.3102	1450.71	98.3592	1450.71	98.6596	1450.71	98.7763	1450.71	98.7232
1451.19	98.2507	1451.19	98.3043	1451.19	98.3542	1451.19	98.6526	1451.19	98.7648	1451.19	98.7094
1451.68	98.2474	1451.68	98.2987	1451.68	98.3492	1451.68	98.646	1451.68	98.7525	1451.68	98.6949
1452.16	98.2445	1452.16	98.2936	1452.16	98.3441	1452.16	98.6401	1452.16	98.7401	1452.16	98.6801
1452.64	98.2419	1452.64	98.2888	1452.64	98.3386	1452.64	98.6347	1452.64	98.7278	1452.64	98.6651
1453.12	98.2394	1453.12	98.2841	1453.12	98.3327	1453.12	98.6293	1453.12	98.7158	1453.12	98.6498
1453.61	98.2369	1453.61	98.2792	1453.61	98.3259	1453.61	98.6231	1453.61	98.704	1453.61	98.6343
1454.09	98.234	1454.09	98.2737	1454.09	98.3185	1454.09	98.6155	1454.09	98.6924	1454.09	98.6184
1454.57	98.2308	1454.57	98.2678	1454.57	98.3106	1454.57	98.6064	1454.57	98.6814	1454.57	98.6029
1455.05	98.2275	1455.05	98.2617	1455.05	98.3027	1455.05	98.5965	1455.05	98.6715	1455.05	98.5888
1455.53	98.2246	1455.53	98.2562	1455.53	98.2958	1455.53	98.587	1455.53	98.6638	1455.53	98.5775
1456.02	98.2228	1456.02	98.252	1456.02	98.2909	1456.02	98.5798	1456.02	98.6593	1456.02	98.5708
1456.5	98.2225	1456.5	98.2501	1456.5	98.2889	1456.5	98.5762	1456.5	98.6589	1456.5	98.57
1456.98	98.2241	1456.98	98.2508	1456.98	98.2904	1456.98	98.5773	1456.98	98.6627	1456.98	98.5756
1457.46	98.2276	1457.46	98.2543	1457.46	98.2956	1457.46	98.5832	1457.46	98.6706	1457.46	98.5872
1457.94	98.2326	1457.94	98.2603	1457.94	98.304	1457.94	98.5928	1457.94	98.6814	1457.94	98.6038
1458.43	98.2382	1458.43	98.268	1458.43	98.315	1458.43	98.6048	1458.43	98.6942	1458.43	98.6236
1458.91	98.2439	1458.91	98.2766	1458.91	98.3276	1458.91	98.6175	1458.91	98.7076	1458.91	98.6449
1459.39	98.2491	1459.39	98.2853	1459.39	98.3408	1459.39	98.6298	1459.39	98.7211	1459.39	98.6662
1459.87	98.2536	1459.87	98.2933	1459.87	98.3537	1459.87	98.6407	1459.87	98.7341	1459.87	98.6866
1460.36	98.2573	1460.36	98.3003	1460.36	98.3657	1460.36	98.6501	1460.36	98.7465	1460.36	98.7054
1460.84	98.2602	1460.84	98.3061	1460.84	98.3762	1460.84	98.6582	1460.84	98.7582	1460.84	98.7224
1461.32	98.2625	1461.32	98.3106	1461.32	98.3846	1461.32	98.665	1461.32	98.7691	1461.32	98.7372
1461.8	98.2641	1461.8	98.3141	1461.8	98.3907	1461.8	98.6711	1461.8	98.7789	1461.8	98.7496
1462.28	98.265	1462.28	98.3166	1462.28	98.3942	1462.28	98.6766	1462.28	98.7874	1462.28	98.7595
1462.77	98.2651	1462.77	98.3187	1462.77	98.3954	1462.77	98.6818	1462.77	98.7944	1462.77	98.7671
1463.25	98.2645	1463.25	98.3207	1463.25	98.3949	1463.25	98.6868	1463.25	98.8001	1463.25	98.7729
1463.73	98.2636	1463.73	98.3229	1463.73	98.3936	1463.73	98.6919	1463.73	98.805	1463.73	98.7779
1464.21	98.2626	1464.21	98.3255	1464.21	98.3925	1464.21	98.6971	1464.21	98.8095	1464.21	98.7831
1464.69	98.2618	1464.69	98.3288	1464.69	98.3925	1464.69	98.7026	1464.69	98.8145	1464.69	98.7893
1465.18	98.2616	1465.18	98.3324	1465.18	98.394	1465.18	98.7083	1465.18	98.8202	1465.18	98.797
1465.66	98.2616	1465.66	98.3359	1465.66	98.3971	1465.66	98.714	1465.66	98.8266	1465.66	98.8057
1466.14	98.2616	1466.14	98.339	1466.14	98.4008	1466.14	98.7191	1466.14	98.8332	1466.14	98.8147
1466.62	98.261	1466.62	98.341	1466.62	98.4043	1466.62	98.7234	1466.62	98.8392	1466.62	98.8226
1467.1	98.2595	1467.1	98.3418	1467.1	98.4066	1467.1	98.7262	1467.1	98.8437	1467.1	98.8284
1467.59	98.2567	1467.59	98.3413	1467.59	98.4068	1467.59	98.7274	1467.59	98.8459	1467.59	98.8311
1468.07	98.2528	1468.07	98.3397	1468.07	98.4046	1468.07	98.7268	1468.07	98.8454	1468.07	98.8305
1468.55	98.2479	1468.55	98.3372	1468.55	98.4002	1468.55	98.7242	1468.55	98.8419	1468.55	98.8267
1469.03	98.2424	1469.03	98.334	1469.03	98.3939	1469.03	98.7194	1469.03	98.8355	1469.03	98.8204
1469.52	98.2366	1469.52	98.3302	1469.52	98.3862	1469.52	98.7125	1469.52	98.8265	1469.52	98.8123
1470	98.2306	1470	98.3255	1470	98.3777	1470	98.7035	1470	98.8157	1470	98.8033
1470.48	98.2245	1470.48	98.3199	1470.48	98.3688	1470.48	98.6926	1470.48	98.8037	1470.48	98.7943
1470.96	98.2185	1470.96	98.3133	1470.96	98.36	1470.96	98.6806	1470.96	98.7918	1470.96	98.7861
1471.44	98.2128	1471.44	98.3061	1471.44	98.3518	1471.44	98.6685	1471.44	98.781	1471.44	98.7794
1471.93	98.2078	1471.93	98.2987	1471.93	98.3447	1471.93	98.6577	1471.93	98.7723	1471.93	98.7751
1472.41	98.2037	1472.41	98.2918	1472.41	98.3394	1472.41	98.6494	1472.41	98.7664	1472.41	98.7739
1472.89	98.201	1472.89	98.2862	1472.89	98.3363	1472.89	98.6448	1472.89	98.7636	1472.89	98.7762
1473.37	98.1997	1473.37	98.2823	1473.37	98.3356	1473.37	98.6442	1473.37	98.764	1473.37	98.7823
1473.85	98.1996	1473.85	98.2806	1473.85	98.3371	1473.85	98.6477	1473.85	98.7672	1473.85	98.7922
1474.34	98.2005	1474.34	98.2809	1474.34	98.3406	1474.34	98.6548	1474.34	98.7731	1474.34	98.8057
1474.82	98.202	1474.82	98.2834	1474.82	98.3458	1474.82	98.6648	1474.82	98.7815	1474.82	98.8225
1475.3	98.2041	1475.3	98.2877	1475.3	98.3525	1475.3	98.677	1475.3	98.7926	1475.3	98.8422
1475.78	98.2069	1475.78	98.2938	1475.78	98.3607	1475.78	98.6907	1475.78	98.8067	1475.78	98.8648
1476.27	98.2104	1476.27	98.3015	1476.27	98.3708	1476.27	98.7057	1476.27	98.8239	1476.27	98.89
1476.75	98.215	1476.75	98.3107	1476.75	98.3829	1476.75	98.7217	1476.75	98.8442	1476.75	98.9176
1477.23	98.2206	1477.23	98.321	1477.23	98.3969	1477.23	98.7384	1477.23	98.8668	1477.23	98.9471
1477.71	98.227	1477.71	98.3321	1477.71	98.4125	1477.71	98.7555	1477.71	98.8909	1477.71	98.9776
1478.19	98.2339	1478.19	98.3436	1478.19	98.4289	1478.19	98.7726	1478.19	98.9152	1478.19	99.0084
1478.67	98.2407	1478.67	98.355	1478.67	98.4452	1478.67	98.7894	1478.67	98.9387	1478.67	99.0385
1479.16	98.2471	1479.16	98.3661	1479.16	98.4604	1479.16	98.8058	1479.16	98.9608	1479.16	99.0673
1479.64	98.2528	1479.64	98.3769	1479.64	98.4741	1479.64	98.8217	1479.64	98.9813	1479.64	99.0944
1480.12	98.2578	1480.12	98.3875	1480.12	98.486	1480.12	98.8369	1480.12	99.0003	1480.12	99.1198
1480.6	98.2622	1480.6	98.3979	1480.6	98.4965	1480.6	98.8515	1480.6	99.0181	1480.6	99.1437
1481.09	98.2661	1481.09	98.4081	1481.09	98.5059	1481.09	98.8652	1481.09	99.035	1481.09	99.1661
1481.57	98.2695	1481.57	98.4178	1481.57	98.5147	1481.57	98.8777	1481.57	99.0508	1481.57	99.1872
1482.05	98.2723	1482.05	98.4267	1482.05	98.5229	1482.05	98.8884	1482.05	99.0654	1482.05	99.2068
1482.53	98.2744	1482.53	98.4346	1482.53	98.5307	1482.53	98.8972	1482.53	99.0782	1482.53	99.2246
1483.01	98.276	1483.01	98.4411	1483.01	98.5378	1483.01	98.904	1483.01	99.0891	1483.01	99.2403
1483.5	98.2771	1483.5	98.4464	1483.5	98.5442	1483.5	98.9092	1483.5	99.098	1483.5	99.2537
1483.98	98.278	1483.98	98.4506	1483.98	98.5498	1483.98	98.9132	1483.98	99.1053	1483.98	99.265
1484.46	98.2793	1484.46	98.454	1484.46	98.5547	1484.46	98.9167	1484.46	99.1113	1484.46	99.2745
1484.94	98.2809	1484.94	98.4567	1484.94	98.5592	1484.94	98.9204	1484.94	99.1166	1484.94	99.2827
1485.42	98.283	1485.42	98.4589	1485.42	98.5633	1485.42	98.9246	1485.42	99.1214	1485.42	99.2903
1485.91	98.2851	1485.91	98.4604	1485.91	98.5672	1485.91	98.9291	1485.91	99.126	1485.91	99.2978
1486.39	98.2869	1486.39	98.461	1486.39	98.5709	1486.39	98.9338	1486.39	99.1302	1486.39	99.3055
1486.87	98.2879	1486.87	98.4608	1486.87	98.5742	1486.87	98.9381	1486.87	99.1339	1486.87	99.3134
1487.35	98.2879	1487.35	98.46	1487.35	98.5771	1487.35	98.9416	1487.35	99.1371	1487.35	99.3216
1487.84	98.2869	1487.84	98.459	1487.84	98.5797	1487.84	98.9442	1487.84	99.1398	1487.84	99.3298
1488.32	98.2853	1488.32	98.4583	1488.32	98.5821	1488.32	98.946	1488.32	99.1422	1488.32	99.3378
1488.8	98.2834	1488.8	98.4585	1488.8	98.5845	1488.8	98.9472	1488.8	99.1446	1488.8	99.3456
1489.28	98.2816	1489.28	98.4596	1489.28	98.5871	1489.28	98.9483	1489.28	99.1472	1489.28	99.353
1489.76	98.2802	1489.76	98.4617	1489.76	98.5898	1489.76	98.9497	1489.76	99.1501	1489.76	99.3602
1490.25	98.2791	1490.25	98.4643	1490.25	98.5926	1490.25	98.9517	1490.25	99.1532	1490.25	99.3674
1490.73	98.2785	1490.73	98.467	1490.73	98.5954	1490.73	98.9548	1490.73	99.1565	1490.73	99.3749
1491.21	98.2781	1491.21	98.4696	1491.21	98.5981	1491.21	98.9588	1491.21	99.1597	1491.21	99.3827
1491.69	98.2782	1491.69	98.4719	1491.69	98.6007	1491.69	98.9639	1491.69	99.163	1491.69	99.3911
1492.17	98.2786	1492.17	98.474	1492.17	98.6031	1492.17	98.9697	1492.17	99.1664	1492.17	99.3997
1492.66	98.2796	1492.66	98.4758	1492.66	98.6057	1492.66	98.9759	1492.66	99.1698	1492.66	99.4085
1493.14	98.2811	1493.14	98.4776	1493.14	98.6083	1493.14	98.982	1493.14	99.1736	1493.14	99.4169
1493.62	98.2831	1493.62	98.4793	1493.62	98.611	1493.62	98.9876	1493.62	99.1777	1493.62	99.4248
1494.1	98.2854	1494.1	98.4806	1494.1	98.6137	1494.1	98.9922	1494.1	99.1822	1494.1	99.4321
1494.59	98.2877	1494.59	98.4815	1494.59	98.6162	1494.59	98.9959	1494.59	99.1872	1494.59	99.4386
1495.07	98.2897	1495.07	98.4819	1495.07	98.6183	1495.07	98.9985	1495.07	99.1927	1495.07	99.4446
1495.55	98.2914	1495.55	98.4819	1495.55	98.62	1495.55	99.0006	1495.55	99.1987	1495.55	99.4501
1496.03	98.2925	1496.03	98.4815	1496.03	98.6213	1496.03	99.0022	1496.03	99.2048	1496.03	99.4554
1496.51	98.2931	1496.51	98.481	1496.51	98.6223	1496.51	99.0038	1496.51	99.2109	1496.51	99.4602
1497	98.2931	1497	98.4804	1497	98.623	1497	99.0054	1497	99.2165	1497	99.4643
1497.48	98.2923	1497.48	98.4794	1497.48	98.6236	1497.48	99.007	1497.48	99.2213	1497.48	99.4673
1497.96	98.2909	1497.96	98.4781	1497.96	98.6238	1497.96	99.0083	1497.96	99.2248	1497.96	99.469
1498.44	98.2888	1498.44	98.4762	1498.44	98.6238	1498.44	99.0092	1498.44	99.2269	1498.44	99.4695
1498.92	98.2863	1498.92	98.474	1498.92	98.6235	1498.92	99.0097	1498.92	99.2278	1498.92	99.469
1499.41	98.2838	1499.41	98.4719	1499.41	98.6233	1499.41	99.0098	1499.41	99.2277	1499.41	99.4681
1499.89	98.2818	1499.89	98.4702	1499.89	98.6232	1499.89	99.0096	1499.89	99.2269	1499.89	99.4676
1500.37	98.2803	1500.37	98.4696	1500.37	98.6235	1500.37	99.0092	1500.37	99.2257	1500.37	99.4676
1500.85	98.2796	1500.85	98.4701	1500.85	98.6241	1500.85	99.0088	1500.85	99.2241	1500.85	99.4685
1501.34	98.2792	1501.34	98.4715	1501.34	98.6249	1501.34	99.008	1501.34	99.2218	1501.34	99.4696
1501.82	98.2786	1501.82	98.4733	1501.82	98.6252	1501.82	99.0066	1501.82	99.2186	1501.82	99.4703
1502.3	98.2771	1502.3	98.4747	1502.3	98.6247	1502.3	99.0044	1502.3	99.2144	1502.3	99.4698
1502.78	98.2744	1502.78	98.475	1502.78	98.6227	1502.78	99.0011	1502.78	99.209	1502.78	99.4674
1503.26	98.2703	1503.26	98.4739	1503.26	98.6191	1503.26	98.9967	1503.26	99.2028	1503.26	99.4629
1503.75	98.265	1503.75	98.4713	1503.75	98.614	1503.75	98.9916	1503.75	99.1961	1503.75	99.4566
1504.23	98.2591	1504.23	98.4676	1504.23	98.6078	1504.23	98.986	1504.23	99.1894	1504.23	99.4491
1504.71	98.2532	1504.71	98.4633	1504.71	98.6013	1504.71	98.9804	1504.71	99.1833	1504.71	99.4416
1505.19	98.2482	1505.19	98.4588	1505.19	98.5953	1505.19	98.9752	1505.19	99.1782	1505.19	99.4349
1505.67	98.2444	1505.67	98.4548	1505.67	98.5903	1505.67	98.971	1505.67	99.1742	1505.67	99.4301
1506.16	98.2422	1506.16	98.4514	1506.16	98.5867	1506.16	98.968	1506.16	99.1717	1506.16	99.4278
1506.64	98.2414	1506.64	98.4488	1506.64	98.5847	1506.64	98.9664	1506.64	99.1706	1506.64	99.4281
1507.12	98.2419	1507.12	98.447	1507.12	98.584	1507.12	98.9662	1507.12	99.1712	1507.12	99.4309
1507.6	98.2432	1507.6	98.4461	1507.6	98.5841	1507.6	98.9673	1507.6	99.1732	1507.6	99.4356
1508.09	98.2447	1508.09	98.4459	1508.09	98.5846	1508.09	98.9693	1508.09	99.1765	1508.09	99.4414
1508.57	98.2461	1508.57	98.4463	1508.57	98.5851	1508.57	98.9717	1508.57	99.1805	1508.57	99.4477
1509.05	98.2467	1509.05	98.4468	1509.05	98.5852	1509.05	98.974	1509.05	99.1848	1509.05	99.4535
1509.53	98.2463	1509.53	98.4472	1509.53	98.5847	1509.53	98.9757	1509.53	99.1887	1509.53	99.4584
1510.01	98.2448	1510.01	98.4471	1510.01	98.5838	1510.01	98.9767	1510.01	99.1919	1510.01	99.462
1510.49	98.2423	1510.49	98.4464	1510.49	98.5827	1510.49	98.9767	1510.49	99.194	1510.49	99.4642
1510.98	98.2391	1510.98	98.4451	1510.98	98.582	1510.98	98.9762	1510.98	99.1953	1510.98	99.4652
1511.46	98.2355	1511.46	98.4434	1511.46	98.582	1511.46	98.9752	1511.46	99.1959	1511.46	99.4654
1511.94	98.232	1511.94	98.4416	1511.94	98.5829	1511.94	98.9742	1511.94	99.1962	1511.94	99.4648
1512.42	98.2285	1512.42	98.44	1512.42	98.5846	1512.42	98.9732	1512.42	99.1963	1512.42	99.4638
1512.91	98.2251	1512.91	98.4385	1512.91	98.5865	1512.91	98.9722	1512.91	99.1961	1512.91	99.462
1513.39	98.2214	1513.39	98.4371	1513.39	98.5881	1513.39	98.971	1513.39	99.1954	1513.39	99.4593
1513.87	98.2171	1513.87	98.4354	1513.87	98.5884	1513.87	98.9692	1513.87	99.1938	1513.87	99.4555
1514.35	98.2122	1514.35	98.433	1514.35	98.5868	1514.35	98.9667	1514.35	99.1911	1514.35	99.4506
1514.84	98.2067	1514.84	98.43	1514.84	98.5834	1514.84	98.9636	1514.84	99.1875	1514.84	99.445
1515.32	98.2008	1515.32	98.4262	1515.32	98.5783	1515.32	98.9602	1515.32	99.1834	1515.32	99.4391
1515.8	98.1952	1515.8	98.4222	1515.8	98.5723	1515.8	98.9569	1515.8	99.1792	1515.8	99.4337
1516.28	98.1902	1516.28	98.4183	1516.28	98.5662	1516.28	98.9541	1516.28	99.1756	1516.28	99.4294
1516.76	98.1862	1516.76	98.4149	1516.76	98.5608	1516.76	98.952	1516.76	99.1726	1516.76	99.4264
1517.24	98.1834	1517.24	98.4121	1517.24	98.5565	1517.24	98.9506	1517.24	99.1702	1517.24	99.4247
1517.73	98.1815	1517.73	98.4099	1517.73	98.5532	1517.73	98.9495	1517.73	99.1677	1517.73	99.4236
1518.21	98.1802	1518.21	98.4081	1518.21	98.5508	1518.21	98.9483	1518.21	99.1647	1518.21	99.4226
1518.69	98.1792	1518.69	98.4063	1518.69	98.5488	1518.69	98.9465	1518.69	99.1606	1518.69	99.4209
1519.17	98.1782	1519.17	98.4042	1519.17	98.5469	1519.17	98.9439	1519.17	99.1554	1519.17	99.4182
1519.66	98.177	1519.66	98.4016	1519.66	98.5449	1519.66	98.9406	1519.66	99.1494	1519.66	99.4146
1520.14	98.1755	1520.14	98.3986	1520.14	98.5429	1520.14	98.9368	1520.14	99.1434	1520.14	99.4109
1520.62	98.1738	1520.62	98.3952	1520.62	98.5411	1520.62	98.9331	1520.62	99.1384	1520.62	99.4077
1521.1	98.1719	1521.1	98.3916	1521.1	98.5398	1521.1	98.93	1521.1	99.1351	1521.1	99.4057
1521.58	98.17	1521.58	98.3879	1521.58	98.5392	1521.58	98.928	1521.58	99.1339	1521.58	99.4056
1522.07	98.1681	1522.07	98.3845	1522.07	98.5391	1522.07	98.9272	1522.07	99.1348	1522.07	99.4071
1522.55	98.1664	1522.55	98.3814	1522.55	98.5394	1522.55	98.9275	1522.55	99.1371	1522.55	99.4098
1523.03	98.165	1523.03	98.3788	1523.03	98.5397	1523.03	98.9284	1523.03	99.1401	1523.03	99.4127
1523.51	98.1637	1523.51	98.3767	1523.51	98.5398	1523.51	98.9292	1523.51	99.1427	1523.51	99.4149
1523.99	98.1622	1523.99	98.3749	1523.99	98.5392	1523.99	98.9295	1523.99	99.1443	1523.99	99.4154
1524.48	98.1602	1524.48	98.373	1524.48	98.5377	1524.48	98.9285	1524.48	99.1443	1524.48	99.414
1524.96	98.1572	1524.96	98.3707	1524.96	98.535	1524.96	98.926	1524.96	99.1424	1524.96	99.4103
1525.44	98.153	1525.44	98.3677	1525.44	98.531	1525.44	98.922	1525.44	99.1389	1525.44	99.4049
1525.92	98.1476	1525.92	98.3637	1525.92	98.5259	1525.92	98.9167	1525.92	99.1341	1525.92	99.3984
1526.41	98.1415	1526.41	98.359	1526.41	98.5199	1526.41	98.9108	1526.41	99.1286	1526.41	99.3917
1526.89	98.1352	1526.89	98.3539	1526.89	98.5133	1526.89	98.9047	1526.89	99.1229	1526.89	99.3857
1527.37	98.1292	1527.37	98.3489	1527.37	98.5064	1527.37	98.899	1527.37	99.1176	1527.37	99.3809
1527.85	98.124	1527.85	98.3446	1527.85	98.4996	1527.85	98.8939	1527.85	99.1132	1527.85	99.3779
1528.33	98.1197	1528.33	98.341	1528.33	98.493	1528.33	98.8894	1528.33	99.1096	1528.33	99.3765
1528.82	98.1157	1528.82	98.3381	1528.82	98.4866	1528.82	98.8854	1528.82	99.1069	1528.82	99.3765
1529.3	98.1117	1529.3	98.3353	1529.3	98.4802	1529.3	98.8817	1529.3	99.1047	1529.3	99.3773
1529.78	98.1071	1529.78	98.3322	1529.78	98.4737	1529.78	98.878	1529.78	99.1028	1529.78	99.3782
1530.26	98.1016	1530.26	98.3281	1530.26	98.467	1530.26	98.8742	1530.26	99.1007	1530.26	99.3785
1530.74	98.0953	1530.74	98.3228	1530.74	98.4601	1530.74	98.87	1530.74	99.0982	1530.74	99.3777
1531.23	98.0887	1531.23	98.3162	1531.23	98.4534	1531.23	98.8655	1531.23	99.0951	1531.23	99.3754
1531.71	98.0821	1531.71	98.3084	1531.71	98.4469	1531.71	98.8607	1531.71	99.0914	1531.71	99.3715
1532.19	98.0761	1532.19	98.3001	1532.19	98.4411	1532.19	98.8556	1532.19	99.0871	1532.19	99.3664
1532.67	98.0708	1532.67	98.2916	1532.67	98.436	1532.67	98.8503	1532.67	99.0823	1532.67	99.3605
1533.15	98.066	1533.15	98.2833	1533.15	98.4318	1533.15	98.845	1533.15	99.0771	1533.15	99.3543
1533.64	98.0613	1533.64	98.2758	1533.64	98.4282	1533.64	98.8398	1533.64	99.0715	1533.64	99.3484
1534.12	98.0562	1534.12	98.2693	1534.12	98.425	1534.12	98.8349	1534.12	99.0657	1534.12	99.3432
1534.6	98.0503	1534.6	98.2638	1534.6	98.4217	1534.6	98.8305	1534.6	99.0597	1534.6	99.3386
1535.08	98.0436	1535.08	98.2593	1535.08	98.4182	1535.08	98.8263	1535.08	99.0535	1535.08	99.3346
1535.57	98.0361	1535.57	98.2556	1535.57	98.4142	1535.57	98.8222	1535.57	99.0471	1535.57	99.3304
1536.05	98.0279	1536.05	98.2521	1536.05	98.4099	1536.05	98.8178	1536.05	99.0403	1536.05	99.3256
1536.53	98.0192	1536.53	98.2485	1536.53	98.4051	1536.53	98.8124	1536.53	99.0332	1536.53	99.3196
1537.01	98.0103	1537.01	98.244	1537.01	98.4001	1537.01	98.8059	1537.01	99.0256	1537.01	99.3121
1537.49	98.0014	1537.49	98.2385	1537.49	98.3948	1537.49	98.7982	1537.49	99.0176	1537.49	99.3033
1537.98	97.9927	1537.98	98.2317	1537.98	98.3893	1537.98	98.7896	1537.98	99.0094	1537.98	99.2938
1538.46	97.9845	1538.46	98.2241	1538.46	98.3836	1538.46	98.7807	1538.46	99.0013	1538.46	99.2845
1538.94	97.9772	1538.94	98.216	1538.94	98.3778	1538.94	98.7723	1538.94	98.9939	1538.94	99.2762
1539.42	97.9712	1539.42	98.2084	1539.42	98.3716	1539.42	98.7652	1539.42	98.9877	1539.42	99.2699
1539.9	97.9666	1539.9	98.2016	1539.9	98.3654	1539.9	98.76	1539.9	98.9832	1539.9	99.266
1540.39	97.9631	1540.39	98.196	1540.39	98.359	1540.39	98.7567	1540.39	98.9804	1540.39	99.2645
1540.87	97.9605	1540.87	98.1914	1540.87	98.3528	1540.87	98.7549	1540.87	98.9792	1540.87	99.2649
1541.35	97.9578	1541.35	98.1875	1541.35	98.3467	1541.35	98.7542	1541.35	98.9789	1541.35	99.2665
1541.83	97.9547	1541.83	98.1839	1541.83	98.341	1541.83	98.7538	1541.83	98.979	1541.83	99.2684
1542.32	97.9506	1542.32	98.18	1542.32	98.3359	1542.32	98.7532	1542.32	98.9785	1542.32	99.2696
1542.8	97.9454	1542.8	98.1758	1542.8	98.3314	1542.8	98.7521	1542.8	98.977	1542.8	99.2698
1543.28	97.9394	1543.28	98.1714	1543.28	98.3274	1543.28	98.7505	1543.28	98.9742	1543.28	99.2686
1543.76	97.9327	1543.76	98.1669	1543.76	98.3241	1543.76	98.7485	1543.76	98.9702	1543.76	99.2661
1544.24	97.9259	1544.24	98.1625	1544.24	98.3211	1544.24	98.7464	1544.24	98.9655	1544.24	99.2627
1544.73	97.9191	1544.73	98.1582	1544.73	98.3184	1544.73	98.7445	1544.73	98.9607	1544.73	99.2588
1545.21	97.9125	1545.21	98.1541	1545.21	98.3156	1545.21	98.7427	1545.21	98.9563	1545.21	99.2547
1545.69	97.906	1545.69	98.1499	1545.69	98.3125	1545.69	98.7406	1545.69	98.9527	1545.69	99.2507
1546.17	97.8996	1546.17	98.1453	1546.17	98.3088	1546.17	98.7379	1546.17	98.9496	1546.17	99.2467
1546.65	97.893	1546.65	98.1401	1546.65	98.3042	1546.65	98.7338	1546.65	98.9468	1546.65	99.2425
1547.14	97.8863	1547.14	98.1341	1547.14	98.2987	1547.14	98.7282	1547.14	98.9437	1547.14	99.238
1547.62	97.8798	1547.62	98.1274	1547.62	98.2924	1547.62	98.7208	1547.62	98.9399	1547.62	99.233
1548.1	97.8735	1548.1	98.12	1548.1	98.2852	1548.1	98.7119	1548.1	98.9353	1548.1	99.2273
1548.58	97.8676	1548.58	98.1122	1548.58	98.2776	1548.58	98.7021	1548.58	98.9298	1548.58	99.2211
1549.07	97.8624	1549.07	98.1042	1549.07	98.2697	1549.07	98.6921	1549.07	98.9238	1549.07	99.2147
1549.55	97.8575	1549.55	98.0962	1549.55	98.2617	1549.55	98.6826	1549.55	98.9178	1549.55	99.2084
1550.03	97.8529	1550.03	98.0884	1550.03	98.254	1550.03	98.6739	1550.03	98.912	1550.03	99.2025
1550.51	97.8479	1550.51	98.0807	1550.51	98.2464	1550.51	98.6662	1550.51	98.9064	1550.51	99.197
1550.99	97.8424	1550.99	98.0734	1550.99	98.2388	1550.99	98.6592	1550.99	98.9008	1550.99	99.1917
1551.48	97.836	1551.48	98.0662	1551.48	98.2314	1551.48	98.6524	1551.48	98.8946	1551.48	99.1866
1551.96	97.8287	1551.96	98.0592	1551.96	98.2239	1551.96	98.6453	1551.96	98.8876	1551.96	99.1812
1552.44	97.8208	1552.44	98.0524	1552.44	98.2164	1552.44	98.6378	1552.44	98.8794	1552.44	99.1754
1552.92	97.8124	1552.92	98.0458	1552.92	98.2089	1552.92	98.6296	1552.92	98.8703	1552.92	99.1692
1553.4	97.804	1553.4	98.0395	1553.4	98.2015	1553.4	98.6211	1553.4	98.8604	1553.4	99.1625
1553.89	97.7959	1553.89	98.0335	1553.89	98.1944	1553.89	98.6123	1553.89	98.8502	1553.89	99.1555
1554.37	97.7879	1554.37	98.0276	1554.37	98.1873	1554.37	98.6033	1554.37	98.8398	1554.37	99.1478
1554.85	97.7799	1554.85	98.0217	1554.85	98.1801	1554.85	98.5939	1554.85	98.8292	1554.85	99.1393
1555.33	97.7714	1555.33	98.0151	1555.33	98.1726	1555.33	98.5837	1555.33	98.8181	1555.33	99.1293
1555.82	97.7619	1555.82	98.0076	1555.82	98.1643	1555.82	98.5725	1555.82	98.8058	1555.82	99.1173
1556.3	97.7512	1556.3	97.9985	1556.3	98.1552	1556.3	98.56	1556.3	98.792	1556.3	99.1033
1556.78	97.7392	1556.78	97.9879	1556.78	98.1452	1556.78	98.5465	1556.78	98.7768	1556.78	99.0873
1557.26	97.7262	1557.26	97.9756	1557.26	98.1346	1557.26	98.5326	1557.26	98.7604	1557.26	99.0702
1557.74	97.7128	1557.74	97.9621	1557.74	98.124	1557.74	98.5191	1557.74	98.744	1557.74	99.0534
1558.23	97.6998	1558.23	97.9482	1558.23	98.1137	1558.23	98.507	1558.23	98.7288	1558.23	99.0383
1558.71	97.6878	1558.71	97.9348	1558.71	98.1041	1558.71	98.497	1558.71	98.716	1558.71	99.0262
1559.19	97.6771	1559.19	97.9228	1559.19	98.0955	1559.19	98.4895	1559.19	98.7066	1559.19	99.0179
1559.67	97.6677	1559.67	97.9127	1559.67	98.0877	1559.67	98.4842	1559.67	98.7007	1559.67	99.0135
1560.15	97.6595	1560.15	97.9048	1560.15	98.0805	1560.15	98.4808	1560.15	98.6981	1560.15	99.0124
1560.64	97.6519	1560.64	97.899	1560.64	98.0735	1560.64	98.4785	1560.64	98.698	1560.64	99.0132
1561.12	97.6448	1561.12	97.8948	1561.12	98.0665	1561.12	98.4765	1561.12	98.6992	1561.12	99.0148
1561.6	97.6377	1561.6	97.8914	1561.6	98.0593	1561.6	98.4743	1561.6	98.7007	1561.6	99.016
1562.08	97.6307	1562.08	97.8879	1562.08	98.052	1562.08	98.4712	1562.08	98.7016	1562.08	99.0158
1562.57	97.6235	1562.57	97.8836	1562.57	98.0445	1562.57	98.4671	1562.57	98.7012	1562.57	99.0141
[truncated: 5,056 more rows]

## Sheet: Fig. SI5
Days	Events	Group
1	0	control
2	0	control
3	0	control
4	0	control
5	0	control
6	0	control
7	0	control
8	0	control
9	0	control
10	0	control
11	1	control
11	1	control
12	1	control
13	2	control
14	1	control
15	0	control
16	1	control
17	1	control
17	1	control
1	0	PEG
2	0	PEG
3	0	PEG
4	0	PEG
5	0	PEG
6	0	PEG
7	0	PEG
8	0	PEG
9	2	PEG
10	0	PEG
11	0	PEG
12	1	PEG
13	0	PEG
14	1	PEG
14	1	PEG
14	1	PEG
15	0	PEG
16	1	PEG
16	1	PEG
17	1	PEG
